# Supplementary material for: Construction of spirocyclic oxindole derivatives by copper-catalyzed enantioselective Michael/hemiketalization in aqueous media
Source: Royal Society of Chemistry journal article supplement (doi:10.1039/d2cc04370j), 2022-01-01
Supplement: d2cc04370j1.pdf [file d2cc04370j1.pdf]

Electronic Supplementary Material (ESI) for ChemComm.  
This journal is © The Royal Society of Chemistry 2022

## Supplementary information

### Table of Contents

|                                                                                                  |    |
|--------------------------------------------------------------------------------------------------|----|
| Part I Experiment Section.....                                                                   | 2  |
| 1.1 General Information.....                                                                     | 2  |
| 1.2 General working procedure of the Michael/hemiketalization reaction (3aa as an example) ..... | 2  |
| 1.3 Optimization of reaction conditions .....                                                    | 3  |
| 1.4.1 Procedure of the Michael/hemiketalization reaction on gram scale .....                     | 4  |
| 1.4.2 Procedure for the Ligand L <sub>6</sub> .....                                              | 4  |
| 1.5 Experimental date of products .....                                                          | 5  |
| 1.6 Control experiments and DFT calculations .....                                               | 18 |
| References: .....                                                                                | 31 |
| <br>                                                                                             |    |
| Part II <sup>1</sup> H NMR & <sup>19</sup> F NMR & <sup>13</sup> C NMR.....                      | 32 |
| <br>                                                                                             |    |
| Part III HPLC data.....                                                                          | 64 |
| <br>                                                                                             |    |
| Part IV X-ray data of chiral 3aa.....                                                            | 83 |

## Part I Experiment Section

### 1.1 General Information

$^1\text{H}$  NMR and  $^{13}\text{C}$  NMR were recorded on Bruker-400 MHz Spectrometer ( $^1\text{H}$  NMR: 400 MHz,  $^{13}\text{C}$  NMR: 100 MHz,  $^{19}\text{F}$  NMR: 376 MHz) and Bruker-500 MHz Spectr-ometer ( $^1\text{H}$  NMR: 500 MHz,  $^{13}\text{C}$  NMR: 125 MHz,  $^{19}\text{F}$  NMR: 470 MHz) using TMS as internal reference. The chemical shifts ( $\delta$ ) and coupling constants ( $J$ ) were expressed in ppm and Hz respectively. UV-Vis Spectrophotometry was carried out on infrared spectrometer. HPLC analysis was carried out on Agilent 1260 series HPLC with a multiple wavelength detector by commercial chiral columns. Chiralpak IC-H, OD-H, AD-H were purchased from Daicel Chemical Industries, LTD. Optical rotations were measured on a PerKinElmer<sup>TM</sup> Polarimeter (Model 343). HRMS (ESI) were recorded on a Q-TOF Premier. Commercially available compounds were used without further purification. All solvents were purified according to the standard procedures unless otherwise noted. Ligands  $\text{L}^{[1]}$  and isatin-derived  $\beta,\gamma$ -unsaturated  $\alpha$ -ketoesters<sup>[2]</sup> were prepared according to the literature procedures.

### 1.2 General working procedure of the Michael/hemiketalization reaction (3aa as an example)

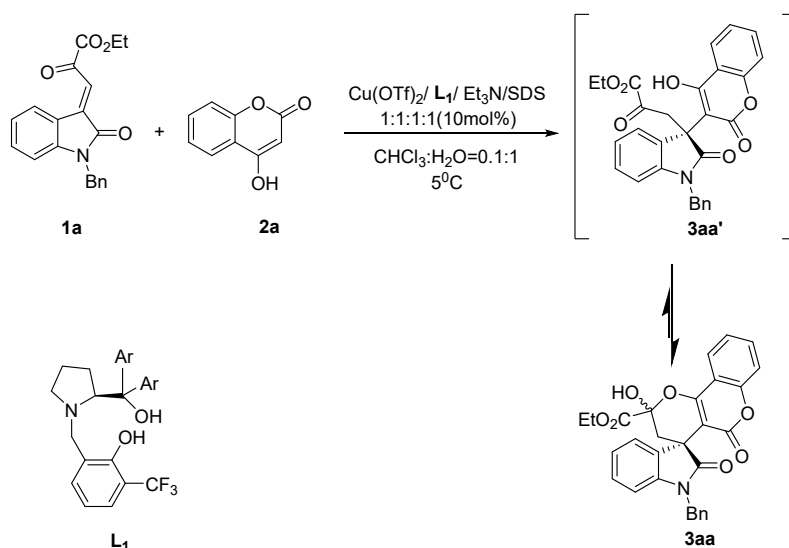

A mixture of Ligand ( $\text{L}_1$ , 4.4 mg, 0.01 mmol),  $\text{Cu}(\text{OTf})_2$  (3.6 mg, 0.01 mmol), SDS (3.0 mg, 0.01 mmol),  $\text{Et}_3\text{N}$  (1.40  $\mu\text{L}$ , 0.01 mmol) in  $\text{CHCl}_3/\text{H}_2\text{O}$  (0.1/1) was stirred for 2h at ambient atmosphere. Then *N*-benzyl isatin-derived  $\beta,\gamma$ -unsaturated  $\alpha$ -ketoester **1a** (33.5 mg, 0.1 mmol) was added and the resulting mixture was cooled to  $5^\circ\text{C}$ . After 10 min, 4-hydroxycoumarin **2a** (20 mg, 0.12 mmol) was added slowly and carried out at  $5^\circ\text{C}$ . After reactions were finished (monitored by TLC), the reaction mixture was extracted with ethyl acetate ( $3 \times 3$  mL). The organic phase was dried with  $\text{Na}_2\text{SO}_4$  and evaporated in vacuum. Purification by flash column chromatograph (petroleum ether:ethyl acetate = 5:1 v/v) afforded **3aa** as a white solid: 93% yield, 46.3 mg, 98% ee.

The Michael addition product was found to exist in rapid equilibrium with a pseudo-diastereomeric hemiketal form in solution. These anomers equilibrate slowly enough that they show up as separate compounds by  $^1\text{H}$ ,  $^{19}\text{F}$  and  $^{13}\text{C}$  NMR but quickly enough that they do not resolve by chromatography.<sup>[3]</sup>

### 1.3 Optimization of reaction conditions

**Table S1** Optimization of the reaction conditions

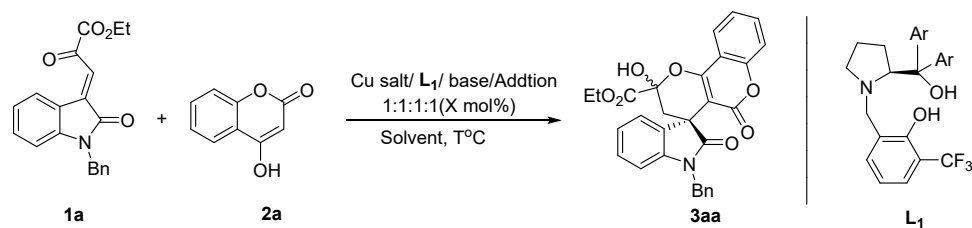

| Entry | Solvent                                         | Cu Salt                                              | Addition                          | base              | T (°C) | X  | Yield (%) <sup>b</sup> | ee (%) <sup>c</sup> |
|-------|-------------------------------------------------|------------------------------------------------------|-----------------------------------|-------------------|--------|----|------------------------|---------------------|
| 1     | DCM:H <sub>2</sub> O<br>=(0.1:1)                | Cu(OTf) <sub>2</sub>                                 | SDS                               | N-ethylmorpholine | 15     | 10 | 86                     | 87                  |
| 2     | DCE :H <sub>2</sub> O<br>=(0.1:1)               | Cu(OTf) <sub>2</sub>                                 | SDS                               | N-ethylmorpholine | 15     | 10 | 84                     | 90                  |
| 3     | CHCl <sub>3</sub> :H <sub>2</sub> O<br>=(0.1:1) | Cu(OTf) <sub>2</sub>                                 | SDS                               | N-ethylmorpholine | 15     | 10 | 93                     | 92                  |
| 4     | CHCl <sub>3</sub> :H <sub>2</sub> O<br>=(0.1:1) | Cu(OTf) <sub>2</sub>                                 | SDS                               | N-ethylmorpholine | 10     | 10 | 92                     | 94                  |
| 5     | CHCl <sub>3</sub> :H <sub>2</sub> O<br>=(0.1:1) | Cu(OTf) <sub>2</sub>                                 | SDS                               | N-ethylmorpholine | 5      | 10 | 92                     | 94                  |
| 6     | CHCl <sub>3</sub> :H <sub>2</sub> O<br>=(0.1:1) | Cu(OTf) <sub>2</sub>                                 | SDS                               | N-ethylmorpholine | 0      | 10 | 89                     | 94                  |
| 7     | CHCl <sub>3</sub> :H <sub>2</sub> O<br>=(0.1:1) | CuBr <sub>2</sub>                                    | SDS                               | N-ethylmorpholine | 5      | 10 | 90                     | 95                  |
| 8     | CHCl <sub>3</sub> :H <sub>2</sub> O<br>=(0.1:1) | Cu(NO <sub>3</sub> ) <sub>2</sub> ·5H <sub>2</sub> O | SDS                               | N-ethylmorpholine | 5      | 10 | 65                     | 95                  |
| 9     | CHCl <sub>3</sub> :H <sub>2</sub> O<br>=(0.1:1) | CuSO <sub>4</sub> ·5H <sub>2</sub> O                 | SDS                               | N-ethylmorpholine | 5      | 10 | 93                     | 90                  |
| 10    | CHCl <sub>3</sub> :H <sub>2</sub> O<br>=(0.1:1) | Cu(OAc) <sub>2</sub> ·H <sub>2</sub> O               | SDS                               | N-ethylmorpholine | 5      | 10 | 85                     | 95                  |
| 11    | CHCl <sub>3</sub> :H <sub>2</sub> O<br>=(0.1:1) | CuCl <sub>2</sub> ·2H <sub>2</sub> O                 | SDS                               | N-ethylmorpholine | 5      | 10 | 61                     | 98                  |
| 12    | CHCl <sub>3</sub> :H <sub>2</sub> O<br>=(0.1:1) | Cu(OTf) <sub>2</sub>                                 | SDS                               | N-ethylmorpholine | 5      | 10 | 93                     | 98                  |
| 13    | CHCl <sub>3</sub> :H <sub>2</sub> O<br>=(0.1:1) | Cu(OTf) <sub>2</sub>                                 | PVP                               | N-ethylmorpholine | 5      | 10 | 93                     | 93                  |
| 14    | CHCl <sub>3</sub> :H <sub>2</sub> O<br>=(0.1:1) | Cu(OTf) <sub>2</sub>                                 | Bu <sub>4</sub> NPF <sub>6</sub>  | N-ethylmorpholine | 5      | 10 | 92                     | 90                  |
| 15    | CHCl <sub>3</sub> :H <sub>2</sub> O<br>=(0.1:1) | Cu(OTf) <sub>2</sub>                                 | Bu <sub>4</sub> NHSO <sub>4</sub> | N-ethylmorpholine | 5      | 10 | 92                     | 90                  |
| 16    | CHCl <sub>3</sub> :H <sub>2</sub> O<br>=(0.1:1) | Cu(OTf) <sub>2</sub>                                 | SDS                               | N-ethylmorpholine | 5      | 5  | 87                     | 90                  |
| 17    | CHCl <sub>3</sub>                               | Cu(OTf) <sub>2</sub>                                 | SDS                               | Et <sub>3</sub> N | 5      | 10 | 90                     | 91                  |

<sup>a</sup>Unless otherwise noted, the reaction of **1a** (0.1 mmol) and **2a** (0.12 mmol) was performed in the presence of **L**, base, Addition and Cu salt in solvent (1.1 mL). <sup>b</sup>Isolated yield. <sup>c</sup>Determined by chiral HPLC analysis.

### 1.4.1 Procedure of the Michael/hemiketalization reaction on gram scale

A mixture of Ligand (**L**<sub>1</sub>, 105.6 mg, 0.24 mmol), Cu(OTf)<sub>2</sub> (84 mg, 0.24 mmol), SDS (72 mg, 0.24 mmol), Et<sub>3</sub>N (33.4 μL, 0.24 mmol) in CHCl<sub>3</sub>/H<sub>2</sub>O (2.4/24) was stirred for 5h at ambient atmosphere. Then *N*-benzyl isatin-derived β,γ-unsaturated α-ketoester **1a** (804.3 mg, 2.4 mmol) was added and the resulting mixture was cooled to 5 °C. After 10 min, 4-hydroxycoumarin **2a** (467.0 mg, 2.88 mmol) was added slowly and carried out at 5 °C. After reactions were finished (monitored by TLC), the reaction mixture was extracted with ethyl acetate (3 × 10 mL). The organic phase was dried with Na<sub>2</sub>SO<sub>4</sub> and evaporated in vacuum. Purification by flash column chromatograph (petroleum ether:ethyl acetate = 5:1 v/v) afforded **3aa** as a white solid: 90% yield, 1.07g, 94% ee.

### 1.4.2 Procedure for the Ligand **L**<sub>6</sub>

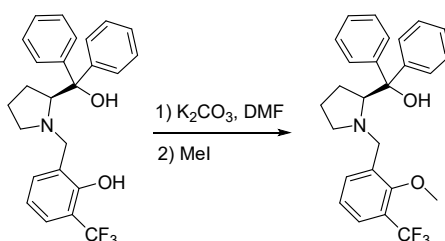

A mixture of **L**<sub>1</sub> (22 mg, 0.05 mmol) and K<sub>2</sub>CO<sub>3</sub> (7.6 mg, 0.055 mmol) in DMF (1.0 mL) was stirred for 4 h at room temperature. MeI (10.6 mg, 0.075 mmol) was added to the mixture and stirred overnight. The mixture was quenched with saturated ammonium chloride solution (1.0 mL), and then extracted with ethyl acetate (3 × 1.0 mL). The organic phase was dried with anhydrous sodium sulfate and evaporated in vacuo. Purification of the residue by column chromatograph (petroleum ether : ethyl acetate = 10:1 v/v) to afford **L**<sub>6</sub> ( 21.8 mg, 0.0494 mmol) in 99% yield.

## 1.5 Experimental date of products

### (3R)-ethyl 1-benzyl-2'-hydroxy-2,5'-dioxo-2',3'-dihydro-5'H-spiro[indoline-3,4'-pyrano[3,2-c]chromene]-2'-carboxylate (3aa)

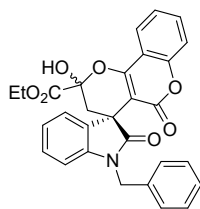

The title compound was prepared according to general working procedure and purified by column chromatography (ethyl acetate:petroleum ether = 1:5 v/v) to give the product as white solid (46.3 mg, 93% yield); m.p. 168 - 170 °C;  $[\alpha]_D^{20} = -22.3$  ( $c = 1.02$ ,  $\text{CHCl}_3$ , 98% ee); HPLC: Daicel Chiralpak AD-H, hexane: 2-propanol = 70:30, flow rate = 1.0 mL/min,  $T = 10$  °C, UV = 254 nm,  $t_R = 9.13$  min (minor),  $t_R = 17.0$  min (major);  $^1\text{H NMR}$  (500 MHz,  $\text{CDCl}_3$ )  $\delta$  9.37 (s, 1H), 8.00 (dd,  $J = 7.9, 1.4$  Hz, 0.8H), 7.85 - 7.79 (m, 0.2H), 7.67 - 7.56 (m, 1H), 7.54 - 7.42 (m, 2H), 7.41 - 7.33 (m, 3H), 7.31 - 7.28 (m, 2H), 7.24 - 7.13 (m, 1H), 7.11 - 6.92 (m, 2H), 6.79 (d,  $J = 7.9$  Hz, 0.8H), 6.71 (d,  $J = 7.8$  Hz, 0.2H), 5.18 - 5.07 (m, 1H), 5.03 - 4.92 (m, 1H), 4.51 - 4.35 (m, 2H), 3.18 (d,  $J = 14.0$  Hz, 0.2H), 2.89 (d,  $J = 15.0$  Hz, 0.8H), 2.66 (d,  $J = 15.0$  Hz, 0.8H), 2.30 (d,  $J = 14.0$  Hz, 0.2H), 1.41 (dt,  $J = 17.5, 7.1$  Hz, 3H);  $^{13}\text{C NMR}$  (125 MHz,  $\text{CDCl}_3$ )  $\delta$  179.8, 178.1, 168.5, 166.9, 160.6, 160.0, 159.6, 159.2, 153.0, 152.8, 143.3, 143.2, 135.7, 134.7, 133.0, 132.5, 131.0, 130.4, 129.1, 129.0, 128.8, 128.3, 127.9, 127.5, 127.2, 127.2, 125.8, 124.3, 124.1, 124.1, 123.8, 123.0, 122.3, 122.1, 116.7, 116.6, 115.2, 115.1, 110.4, 109.5, 102.5, 101.4, 97.1, 95.2, 64.1, 62.9, 46.6, 45.5, 44.8, 44.6, 37.5, 36.9, 14.2, 14.1; HRMS (ESI)  $m/z$  calcd for  $\text{C}_{29}\text{H}_{23}\text{NO}_7$   $[\text{M}+\text{H}]^+$  498.1547, found 498.1552.

### (3R)-ethyl 1-benzyl-5-fluoro-2'-hydroxy-2,5'-dioxo-2',3'-dihydro-5'H-spiro[indolin-e-3,4'-pyrano[3,2-c]chromene]-2'-carboxylate (3ba)

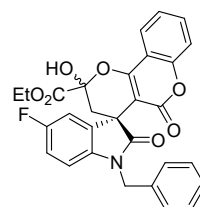

The title compound was prepared according to general working procedure and purified by column chromatography (ethyl acetate:petroleum ether = 1:5 v/v) to give the product as white solid (47.9 mg, 93% yield); m.p. 200 - 202 °C;  $[\alpha]_D^{20} = -41.0$  ( $c = 0.53$ ,  $\text{CHCl}_3$ , 94% ee); HPLC: Daicel Chiralpak AD-H, hexane: 2-propanol = 70:30, flow rate = 0.8 mL/min,  $T = 10$  °C, UV = 254 nm,  $t_R = 12.8$  min (minor),  $t_R = 29.2$  min (major);  $^1\text{H NMR}$  (500 MHz,  $\text{CDCl}_3$ )  $\delta$  9.17 (s, 0.4H), 7.99 (d,  $J = 7.9$  Hz, 0.4H), 7.81 (d,  $J = 7.9$  Hz, 0.6H), 7.63 - 7.52 (m, 1.7H), 7.49 - 7.27 (m, 7H), 7.04 - 6.97 (m, 0.4H), 6.81 - 6.56 (m, 1H), 6.55 - 6.38 (m, 1H), 5.19 (s, 0.6H), 5.15 - 5.02 (m, 1H), 5.02 - 4.86 (m, 1H), 4.54 - 4.33 (m, 2H), 3.15 (d,  $J = 14.0$  Hz, 0.6H), 2.86 (d,  $J = 15.0$  Hz, 0.4H), 2.65 (d,  $J = 15.0$  Hz, 0.4H), 2.27 (d,  $J = 14.0$  Hz, 0.6H), 1.41 (dt,  $J = 14.5, 7.1$  Hz, 3H);  $^{13}\text{C NMR}$  (125 MHz,  $\text{CDCl}_3$ )  $\delta$  180.2, 178.5, 168.4, 166.8, 163.2 ( $^1J_{\text{CF}} = 246.4$  Hz), 163.0 ( $^1J_{\text{CF}} = 245.2$  Hz), 160.7, 160.0, 159.6, 159.2, 153.0, 152.7, 144.8 ( $^3J_{\text{CF}} = 11.9$  Hz), 144.7 ( $^3J_{\text{CF}} = 11.6$  Hz), 135.2, 134.1, 133.1, 132.7, 129.1, 128.9, 128.1, 127.8 ( $^3J_{\text{CF}} = 9.4$  Hz), 127.7, 127.2, 127.2, 126.2 ( $^4J_{\text{CF}} = 2.7$  Hz), 125.8 ( $^4J_{\text{CF}} = 2.7$  Hz), 124.4, 124.2, 123.9, 123.1 ( $^3J_{\text{CF}} = 9.9$  Hz), 123.0, 116.7, 116.6, 115.1, 115.0, 110.3 ( $^2J_{\text{CF}} = 22.9$  Hz), 108.4 ( $^2J_{\text{CF}} = 21.9$  Hz), 102.3, 101.1, 99.4 ( $^2J_{\text{CF}} = 28.3$  Hz), 98.1 ( $^2J_{\text{CF}} = 27.7$  Hz), 97.0, 95.1, 64.2, 63.0, 46.2, 45.1, 45.0, 44.8, 37.4, 36.9, 14.2, 14.1;  $^{19}\text{F NMR}$  (470 MHz,  $\text{CDCl}_3$ )  $\delta$  -110.2, -111.7; HRMS (ESI)  $m/z$  calcd for  $\text{C}_{29}\text{H}_{22}\text{FNO}_7$   $[\text{M}+\text{H}]^+$  516.1453, found 516.1456.

**(3R)-ethyl 1-benzyl-2'-hydroxy-5-methyl-2,5'-dioxo-2',3'-dihydro-5'H-spiro[indoline-3,4'-pyrano[3,2-c]chromene]-2'-carboxylate (3ca)**

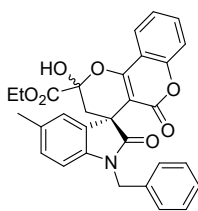

The title compound was prepared according to general working procedure and purified by column chromatography (ethyl acetate:petroleum ether = 1:5 v/v) to give the product as white solid (46.0 mg, 90% yield); m.p. 116 - 118 °C;  $[\alpha]_D^{20} = -32.8$  ( $c = 1.01$ ,  $\text{CHCl}_3$ , 99% ee); HPLC: Daicel Chiralpak AD-H, hexane: 2-propanol = 65:35, flow rate = 1.0 mL/min,  $T = 10$  °C, UV = 254 nm,  $t_R = 7.79$  min (minor),  $t_R = 21.5$  min (major);  $^1\text{H NMR}$  (400 MHz,  $\text{CDCl}_3$ )  $\delta$  9.43 (s, 1H), 7.99 (dd,  $J = 8.0$ , 1.4 Hz, 0.9H), 7.92 – 7.79 (m, 0.1H), 7.58 (ddd,  $J = 8.4$ , 7.4, 1.6 Hz, 1H), 7.50 – 7.40 (m, 2H), 7.40 – 7.26 (m, 5H), 7.16 – 6.77 (m, 2H), 6.66 (d,  $J = 8.0$  Hz, 0.9H), 6.59 (d,  $J = 8.0$  Hz, 0.1H), 5.17 – 5.07 (m, 1H), 5.00 – 4.88 (m, 1H), 4.49 – 4.22 (m, 2H), 3.18 (d,  $J = 14.0$  Hz, 0.1H), 2.87 (d,  $J = 14.9$  Hz, 0.9H), 2.65 (d,  $J = 15.0$  Hz, 0.9H), 2.28 (d,  $J = 14.0$  Hz, 0.1H), 2.24 (s, 2.5H), 2.22 (s, 0.4H), 1.41 (q,  $J = 7.0$  Hz, 3H);  $^{13}\text{C NMR}$  (100 MHz,  $\text{CDCl}_3$ )  $\delta$  179.6, 178.0, 168.6, 167.0, 160.5, 160.0, 159.6, 159.1, 153.0, 152.8, 140.9, 140.8, 135.8, 134.8, 133.9, 132.9, 132.5, 131.7, 130.9, 130.4, 129.4, 128.9, 128.9, 128.8, 127.8, 127.4, 127.2, 127.2, 124.3, 124.1, 123.8, 123.7, 123.0, 122.9, 116.7, 116.6, 115.3, 115.1, 110.1, 109.2, 102.7, 101.5, 97.1, 95.2, 64.1, 62.9, 46.6, 45.5, 44.8, 44.6, 37.6, 37.0, 21.2, 21.2, 14.2, 14.1; HRMS (ESI)  $m/z$  calcd for  $\text{C}_{30}\text{H}_{25}\text{NO}_7$   $[\text{M}+\text{H}]^+$  512.1704, found 512.1704.

**(3R)-ethyl 1-benzyl-2'-hydroxy-5-methoxy-2,5'-dioxo-2',3'-dihydro-5'H-spiro[indoline-3,4'-pyrano[3,2-c]chromene]-2'-carboxylate (3da)**

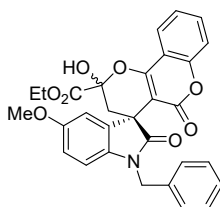

The title compound was prepared according to general working procedure and purified by column chromatography (ethyl acetate:petroleum ether = 1:5 v/v) to give the product as white solid (45.3 mg, 86% yield); m.p. 186 - 189 °C;  $[\alpha]_D^{20} = -49.3$  ( $c = 1.06$ ,  $\text{CHCl}_3$ , 99% ee); HPLC: Daicel Chiralpak AD-H, hexane: 2-propanol = 65:35, flow rate = 1.0 mL/min,  $T = 10$  °C, UV = 254 nm,  $t_R = 10.8$  min (minor),  $t_R = 27.7$  min (major);  $^1\text{H NMR}$  (500 MHz,  $\text{CDCl}_3$ )  $\delta$  9.49 (s, 1H), 8.00 (dd,  $J = 8.0$ , 1.5 Hz, 0.8H), 7.82 (dd,  $J = 8.2$ , 1.3 Hz, 0.2H), 7.65 – 7.52 (m, 1H), 7.44 (dd,  $J = 12.8$ , 7.5 Hz, 2H), 7.39 – 7.31 (m, 3H), 7.32 – 7.27 (m, 2H), 6.81 – 6.55 (m, 3H), 5.19 – 5.06 (m, 1H), 5.01 – 4.88 (m, 1H), 4.62 – 4.28 (m, 2H), 3.69 (s, 2.6H), 3.67 (s, 0.4H), 3.18 (d,  $J = 14.0$  Hz, 0.1H), 2.86 (d,  $J = 14.9$  Hz, 0.9H), 2.66 (d,  $J = 14.9$  Hz, 0.9H), 2.30 (d,  $J = 14.0$  Hz, 0.1H), 1.41 (dt,  $J = 18.7$ , 7.1 Hz, 3H);  $^{13}\text{C NMR}$  (125 MHz,  $\text{CDCl}_3$ )  $\delta$  179.3, 177.7, 168.5, 167.0, 160.6, 160.0, 159.6, 159.1, 157.1, 155.6, 153.0, 152.8, 136.8, 136.4, 135.8, 134.7, 133.0, 132.5, 132.3, 131.8, 129.0, 128.8, 127.8, 127.5, 127.2, 125.9, 124.3, 124.1, 123.8, 123.0, 116.7, 116.6, 115.2, 115.1, 114.2, 113.2, 112.9, 110.8, 109.7, 109.5, 102.6, 101.3, 97.1, 95.2, 64.1, 62.9, 55.7, 55.6, 46.9, 45.9, 44.9, 44.7, 37.6, 36.9, 14.2, 14.1; HRMS (ESI)  $m/z$  calcd for  $\text{C}_{30}\text{H}_{25}\text{NO}_8$   $[\text{M}+\text{H}]^+$  528.1653, found 528.1650.

**(3R)-ethyl 1-benzyl-2'-hydroxy-5,7-dimethyl-2,5'-dioxo-2',3'-dihydro-5'H-spiro[indoline-3,4'-pyrano[3,2-c]chromene]-2'-carboxylate (3ea)**

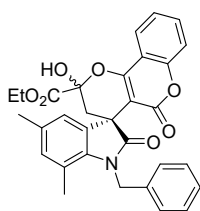

The title compound was prepared according to general working procedure and purified by column chromatography (ethyl acetate:petroleum ether= 1:5 v/v) to give the product as white solid (44.1 mg, 84% yield); m.p. 121 - 127 °C;  $[\alpha]_D^{20} = -24.6$  ( $c = 1.00$ ,  $\text{CHCl}_3$ , 90% ee); HPLC: Daicel Chiralpak AD-H, hexane: 2-propanol = 65:35, flow rate = 1.0 mL/min,  $T = 10$  °C, UV = 254 nm,  $t_R = 6.43$  min (minor),  $t_R = 14.2$  min (major);  $^1\text{H NMR}$  (400 MHz,  $\text{CDCl}_3$ )  $\delta$  9.46 (s, 1H), 8.00 (dd,  $J = 7.9, 1.5$  Hz, 0.9H), 7.83 (dd,  $J = 8.2, 1.5$  Hz, 0.1H), 7.63 – 7.53 (m, 1H), 7.45 – 7.24 (m, 7H), 6.95 – 6.65 (m, 2H), 5.58 – 5.29 (m, 1H), 5.27 – 5.08 (m, 1H), 4.68 – 4.18 (m, 2H), 3.17 (d,  $J = 14.0$  Hz, 0.1H), 2.87 (d,  $J = 14.9$  Hz, 0.9H), 2.67 (d,  $J = 14.9$  Hz, 0.9H), 2.39 (d,  $J = 11.2$  Hz, 0.1H), 2.25 (s, 3H), 2.22 (s, 3H), 1.43 (t,  $J = 7.1$  Hz, 3H);  $^{13}\text{C NMR}$  (100 MHz,  $\text{CDCl}_3$ )  $\delta$  180.6, 167.0, 160.5, 159.7, 153.0, 138.8, 136.7, 133.8, 133.6, 132.9, 131.9, 129.0, 127.4, 125.8, 124.2, 123.8, 120.8, 120.6, 116.6, 115.3, 101.7, 97.1, 62.8, 46.1, 46.1, 38.1, 20.8, 18.4, 14.2; HRMS (ESI)  $m/z$  calcd for  $\text{C}_{31}\text{H}_{27}\text{NO}_7$   $[\text{M}+\text{H}]^+$  526.1860, found 526.1864.

**(3R)-ethyl 1-benzyl-6-fluoro-2'-hydroxy-2,5'-dioxo-2',3'-dihydro-5'H-spiro[indoline-3,4'-pyrano[3,2-c]chromene]-2'-carboxylate (3fa)**

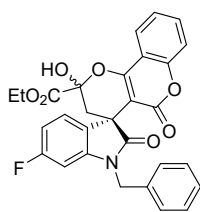

The title compound was prepared according to general working procedure and purified by column chromatography (ethyl acetate:petroleum ether = 1:5 v/v) to give the product as white solid (46.9 mg, 91% yield); m.p. 199 - 201 °C;  $[\alpha]_D^{20} = -3.9$  ( $c = 1.00$ ,  $\text{CHCl}_3$ , 90% ee); HPLC: Daicel Chiralpak AD-H, hexane: 2-propanol = 65:35, flow rate = 1.0 mL/min,  $T = 10$  °C, UV = 254 nm,  $t_R = 7.24$  min (minor),  $t_R = 11.7$  min (major);  $^1\text{H NMR}$  (500 MHz,  $\text{CDCl}_3$ )  $\delta$  9.18 (s, 1H), 7.99 (dd,  $J = 7.9, 1.4$  Hz, 0.7H), 7.81 (dd,  $J = 7.9, 1.2$  Hz, 0.3H), 7.64 – 7.56 (m, 1H), 7.53 – 7.27 (m, 7H), 7.01 (dd,  $J = 8.2, 5.1$  Hz, 1H), 6.79 – 6.59 (m, 1H), 6.57 – 6.40 (m, 1H), 5.16 – 5.04 (m, 1H), 5.04 – 4.88 (m, 1H), 4.60 – 4.17 (m, 2H), 3.15 (d,  $J = 14.0$  Hz, 0.3H), 2.86 (d,  $J = 15.0$  Hz, 0.7H), 2.65 (d,  $J = 15.0$  Hz, 0.7H), 2.27 (d,  $J = 14.0$  Hz, 0.3H), 1.41 (dt,  $J = 16.8, 7.1$  Hz, 3H);  $^{13}\text{C NMR}$  (125 MHz,  $\text{CDCl}_3$ )  $\delta$  180.2, 178.5, 168.4, 166.8, 163.2 ( $^1J_{\text{CF}} = 246.7$  Hz), 163.0 ( $^1J_{\text{CF}} = 245.2$  Hz), 160.7, 160.0, 159.6, 159.2, 153.0, 152.8, 144.8 ( $^3J_{\text{CF}} = 11.9$  Hz), 144.7 ( $^3J_{\text{CF}} = 11.8$  Hz), 135.2, 134.2, 133.1, 132.7, 129.1, 128.9, 128.1, 127.7, 127.2, 127.2, 126.2 ( $^4J_{\text{CF}} = 3.1$  Hz), 125.8 ( $^4J_{\text{CF}} = 2.8$  Hz), 124.4, 124.2, 123.9, 123.2, 123.1, 123.0, 116.7, 116.7, 115.1, 115.0, 110.3 ( $^2J_{\text{CF}} = 22.8$  Hz), 108.4 ( $^2J_{\text{CF}} = 22.0$  Hz), 102.3, 101.1, 99.4 ( $^2J_{\text{CF}} = 28.1$  Hz), 98.1 ( $^2J_{\text{CF}} = 27.6$  Hz), 97.0, 95.1, 64.2, 63.0, 46.2, 45.1, 45.0, 44.8, 37.4, 37.0, 14.2, 14.1;  $^{19}\text{F NMR}$  (470 MHz,  $\text{CDCl}_3$ )  $\delta$  -110.2, -111.7; HRMS (ESI)  $m/z$  calcd for  $\text{C}_{29}\text{H}_{22}\text{FNO}_7$   $[\text{M}+\text{H}]^+$  516.1453, found 516.1461.

**(3R)-ethyl 1-benzyl-2'-hydroxy-6-methoxy-2,5'-dioxo-2',3'-dihydro-5'H-spiro[indoline-3,4'-pyrano[3,2-c]chromene]-2'-carboxylate (3ga)**

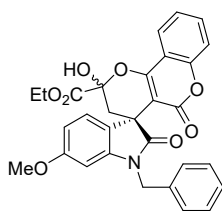

The title compound was prepared according to general working procedure and purified by column chromatography (ethyl acetate:petroleum ether = 1:5 v/v) to give the product as white solid (49.0 mg, 85% yield); m.p. 187 - 191 °C;  $[\alpha]_D^{20} = -8.3$  ( $c = 1.05$ ,  $\text{CHCl}_3$ , 93% ee); HPLC: Daicel Chiralpak AD-H, hexane: 2-propanol = 70:30, flow rate = 1.0 mL/min,  $T = 10$  °C, UV = 210

nm,  $t_R = 9.89$  min (minor),  $t_R = 17.7$  min (major);  $^1\text{H NMR}$  (500 MHz,  $\text{CDCl}_3$ )  $\delta$  9.33 (s, 0.7H), 7.98 (dd,  $J = 8.0, 1.4$  Hz, 0.7H), 7.80 (dd,  $J = 8.1, 1.5$  Hz, 0.3H), 7.62 – 7.50 (m, 1H), 7.49 – 7.40 (m, 2H), 7.40 – 7.27 (m, 5H), 6.96 (d,  $J = 8.3$  Hz, 1H), 6.63 – 6.21 (m, 2H), 5.22 (s, 0.3H), 5.17 – 5.02 (m, 1H), 5.01 – 4.78 (m, 1H), 4.61 – 4.22 (m, 2H), 3.70 (s, 2.2H), 3.68 (s, 0.7H), 3.14 (d,  $J = 13.9$  Hz, 0.3H), 2.86 (d,  $J = 14.9$  Hz, 0.7H), 2.64 (d,  $J = 15.0$  Hz, 0.7H), 2.26 (d,  $J = 13.9$  Hz, 0.3H), 1.49 – 1.35 (m, 3H);  $^{13}\text{C NMR}$  (125 MHz,  $\text{CDCl}_3$ )  $\delta$  180.3, 178.6, 168.5, 166.9, 160.6, 160.4, 160.1, 159.9, 159.6, 158.9, 152.9, 152.7, 144.5, 144.4, 135.6, 134.6, 132.8, 132.4, 128.9, 128.7, 127.8, 127.5, 127.2, 127.2, 124.2, 124.0, 123.8, 122.9, 122.6, 122.5, 122.4, 116.6, 116.5, 115.2, 115.0, 107.6, 105.9, 102.7, 101.6, 98.6, 97.4, 97.0, 95.2, 64.0, 62.8, 55.4, 55.3, 46.0, 45.0, 44.8, 44.6, 37.6, 37.1, 14.1, 14.0; HRMS (ESI)  $m/z$  calcd for  $\text{C}_{30}\text{H}_{25}\text{NO}_8$   $[\text{M}+\text{H}]^+$  528.1653, found 528.1661.

**(3R)-ethyl 1-benzyl-7-fluoro-2'-hydroxy-2,5'-dioxo-2',3'-dihydro-5'H-spiro[indoline-3,4'-pyrano[3,2-c]chromene]-2'-carboxylate (3ha)**

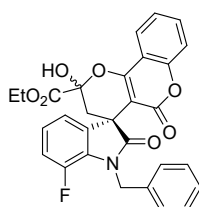

The title compound was prepared according to general working procedure and purified by column chromatography (ethyl acetate:petroleum ether = 1:5 v/v) to give the product as white solid (43.8 mg, 85% yield); m.p. 62 - 65 °C;  $[\alpha]_D^{20} = -8.9$  ( $c = 0.98$ ,  $\text{CHCl}_3$ , 93% ee); HPLC: Daicel Chiralpak AD-H, hexane: 2-propanol = 70:30, flow rate = 1.0 mL/min,  $T = 10$  °C, UV = 254 nm,  $t_R = 5.64$  min (minor),  $t_R = 9.45$  min (major);  $^1\text{H NMR}$  (400 MHz,  $\text{CDCl}_3$ )  $\delta$  9.20 (s, 1H), 7.99 (dd,  $J = 7.9, 1.5$  Hz, 0.8H), 7.82 (dd,  $J = 8.2, 1.4$  Hz, 0.2H), 7.64 – 7.53 (m, 1H), 7.44 (d,  $J = 7.4$  Hz, 2H), 7.41 – 7.26 (m, 5H), 7.01 (dd,  $J = 8.8, 3.3$  Hz, 2H), 6.92 – 6.79 (m, 1H), 5.28 – 5.07 (m, 2H), 4.59 – 4.20 (m, 2H), 3.14 (d,  $J = 14.1$  Hz, 0.2H), 2.84 (d,  $J = 15.0$  Hz, 0.8H), 2.64 (d,  $J = 15.0$  Hz, 0.8H), 2.28 (d,  $J = 14.1$  Hz, 0.2H), 1.50 – 1.39 (m, 3H);  $^{13}\text{C NMR}$  (125 MHz,  $\text{CDCl}_3$ )  $\delta$  179.5, 177.8, 168.4, 166.7, 160.6, 159.9, 159.5, 159.2, 153.0, 152.8, 147.6 ( $^1J_{\text{CF}} = 246.2$  Hz), 147.5 ( $^1J_{\text{CF}} = 243.7$  Hz), 137.1, 135.9, 133.9 ( $^4J_{\text{CF}} = 3.1$  Hz), 133.3 ( $^4J_{\text{CF}} = 2.7$  Hz), 133.1, 132.6, 131.0 ( $^2J_{\text{CF}} = 26.2$  Hz), 130.1 ( $^3J_{\text{CF}} = 8.5$  Hz), 129.8 ( $^3J_{\text{CF}} = 9.0$  Hz), 128.7, 128.5, 127.8, 127.3, 127.2, 124.9 ( $^3J_{\text{CF}} = 6.4$  Hz), 124.3, 124.1, 123.8, 123.0, 122.7 ( $^3J_{\text{CF}} = 6.5$  Hz), 122.5 ( $^4J_{\text{CF}} = 2.6$  Hz), 117.9 ( $^4J_{\text{CF}} = 3.1$  Hz), 117.4 ( $^2J_{\text{CF}} = 19.6$  Hz), 116.7, 116.6, 115.0 ( $^2J_{\text{CF}} = 18.4$  Hz), 102.2, 101.0, 97.0, 95.0, 64.2, 62.9, 46.8, 46.4 ( $^4J_{\text{CF}} = 4.7$  Hz), 46.1 ( $^4J_{\text{CF}} = 4.7$  Hz), 45.6, 37.4, 37.0, 30.6, 29.7, 14.1, 14.0;  $^{19}\text{F NMR}$  (470 MHz,  $\text{CDCl}_3$ )  $\delta$  -133.1, -134.4; HRMS (ESI)  $m/z$  calcd for  $\text{C}_{29}\text{H}_{22}\text{FNO}_7$   $[\text{M}+\text{H}]^+$  516.1453, found 516.1450.

**(3R)-ethyl 1-benzyl-7-chloro-2'-hydroxy-2,5'-dioxo-2',3'-dihydro-5'H-spiro[indoline-3,4'-pyrano[3,2-c]chromene]-2'-carboxylate (3ia)**

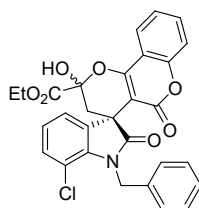

The title compound was prepared according to general working procedure and purified by column chromatography (ethyl acetate:petroleum ether = 1:5 v/v) to give the product as white solid (42.6 mg, 80% yield); m.p. 234 - 235 °C;  $[\alpha]_D^{20} = -4.2$  ( $c = 1.00$ ,  $\text{CHCl}_3$ , 90% ee); HPLC: Daicel Chiralpak AD-H, hexane: 2-propanol = 70:30, flow rate = 1.0 mL/min,  $T = 10$  °C, UV = 254 nm,  $t_R = 8.66$  min (minor),  $t_R = 12.3$  min (major);  $^1\text{H NMR}$  (500 MHz,  $\text{CDCl}_3$ )  $\delta$  9.13 (s, 0.8H), 7.99 (dd,  $J = 7.9, 1.4$  Hz, 0.8H), 7.81 (dd,  $J = 8.1, 1.5$  Hz, 0.2H), 7.72 (dt,  $J =$



8.7, 4.3 Hz, 0.2H), 7.64 – 7.57 (m, 1H), 7.57 – 7.27 (m, 7H), 7.24 – 7.17 (m, 0.8H), 7.17 – 6.78 (m, 2H), 5.60 – 5.33 (m, 2H), 4.54 – 4.34 (m, 2H), 3.91 (s, 0.4H), 3.14 (d,  $J = 14.1$  Hz, 0.2H), 2.84 (d,  $J = 14.9$  Hz, 0.8H), 2.67 (d,  $J = 15.0$  Hz, 0.8H), 2.30 (d,  $J = 14.0$  Hz, 0.2H), 1.40 (dt,  $J = 18.6, 7.1$  Hz, 3H);  $^{13}\text{C}$  NMR (125 MHz,  $\text{CDCl}_3$ )  $\delta$  180.5, 178.7, 168.2, 166.7, 160.7, 159.9, 159.5, 159.3, 153.0, 152.7, 139.4, 139.3, 137.8, 136.5, 134.0, 133.3, 133.1, 132.7, 132.6, 131.7, 131.1, 128.7, 128.5, 127.3, 126.9, 126.3, 126.3, 125.2, 124.9, 124.3, 124.1, 123.8, 123.0, 120.7, 116.7, 116.6, 116.4, 115.0, 114.9, 102.1, 101.0, 97.0, 95.1, 64.2, 62.9, 52.6, 46.2, 46.1, 45.8, 45.2, 37.6, 37.3, 14.1, 14.0; HRMS (ESI)  $m/z$  calcd for  $\text{C}_{29}\text{H}_{22}\text{ClNO}_7$   $[\text{M}+\text{H}]^+$  532.1158, found 532.1165.

**(3R)-ethyl 1-benzyl-7-bromo-2'-hydroxy-2,5'-dioxo-2',3'-dihydro-5'H-spiro[indoline-3,4'-pyrano[3,2-c]chromene]-2'-carboxylate (3ja)**

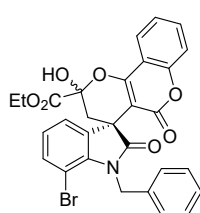

The title compound was prepared according to general working procedure and purified by column chromatography (ethyl acetate:petroleum ether = 1:5 v/v) to give the product as white solid (34.6 mg, 60% yield); m.p. 86 - 91 °C;  $[\alpha]_D^{20} = +13.4$  ( $c = 0.33$ ,  $\text{CHCl}_3$ , 91% ee); HPLC: Daicel Chiralpak IC-H, hexane: 2-propanol = 70:30, flow rate = 1.0 mL/min,  $T = 10$  °C, UV = 210 nm,  $t_R = 13.7$  min (minor),  $t_R = 23.3$  min (major);  $^1\text{H}$  NMR (500 MHz,  $\text{CDCl}_3$ )  $\delta$  9.12 (s, 0.6H), 7.98 (dd,  $J = 7.9, 1.2$  Hz, 0.6H), 7.81 (dd,  $J = 8.1, 1.4$  Hz, 0.4H), 7.77 – 7.43 (m, 2H), 7.42 – 7.29 (m, 7H), 7.04 (d,  $J = 7.1$  Hz, 1H), 6.95 (t,  $J = 7.8$  Hz, 0.6H), 6.83 (t,  $J = 7.8$  Hz, 0.4H), 5.58 – 5.43 (m, 2H), 5.13 (s, 0.4H), 4.50 – 4.35 (m, 2H), 3.15 (d,  $J = 14.0$ , 0.4H), 2.84 (d,  $J = 14.9$  Hz, 0.6H), 2.67 (d,  $J = 15.0$  Hz, 0.6H), 2.30 (d,  $J = 14.0$  Hz, 0.4H), 1.41 (dt,  $J = 17.3, 7.1$  Hz, 3H);  $^{13}\text{C}$  NMR (125 MHz,  $\text{CDCl}_3$ )  $\delta$  181.4, 179.5, 168.3, 166.6, 161.0, 159.9, 159.6, 159.6, 153.0, 152.8, 141.6, 141.5, 135.4, 134.1, 133.3, 132.8, 130.3, 128.5, 128.3, 127.4, 127.3, 127.1, 126.7, 125.9, 125.8, 125.7, 125.7, 124.4, 124.2, 123.9, 123.8, 123.0, 122.0, 121.7, 116.8, 116.7, 115.0, 114.9, 114.1, 113.8, 102.0, 100.7, 96.9, 95.1, 64.3, 63.0, 47.0, 47.0, 45.1, 44.0, 37.5, 37.4, 14.1, 14.1; HRMS (ESI)  $m/z$  calcd for  $\text{C}_{29}\text{H}_{22}\text{BrNO}_7$   $[\text{M}+\text{H}]^+$  576.0652, found 576.0665.

**(3R)-ethyl 1-benzyl-2'-hydroxy-7-methyl-2,5'-dioxo-2',3'-dihydro-5'H-spiro[indoline-3,4'-pyrano[3,2-c]chromene]-2'-carboxylate (3ka)**

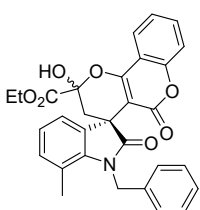

The title compound was prepared according to general working procedure and purified by column chromatography (ethyl acetate:petroleum ether = 1:5 v/v) to give the product as white solid (46.5 mg, 91% yield); m.p. 110 - 113 °C;  $[\alpha]_D^{20} = -15.9$  ( $c = 1.03$ ,  $\text{CHCl}_3$ , 91% ee); HPLC: Daicel Chiralpak AD-H, hexane: 2-propanol = 65:35, flow rate = 1.0 mL/min,  $T = 10$  °C, UV = 254 nm,  $t_R = 7.49$  min (minor),  $t_R = 15.4$  min (major);  $^1\text{H}$  NMR (500 MHz,  $\text{CDCl}_3$ )  $\delta$  9.40 (s, 1H), 7.99 (dd,  $J = 7.9, 1.4$  Hz, 0.8H), 7.82 (dd,  $J = 8.2, 1.5$  Hz, 0.3H), 7.64 – 7.54 (m, 1H), 7.53 – 7.27 (m, 7H), 7.12 – 6.80 (m, 3H), 5.45 – 5.32 (m, 1H), 5.27 – 5.16 (m, 1H), 4.49 – 4.34 (m, 2H), 3.17 (d,  $J = 14.0$  Hz, 0.2H), 2.87 (d,  $J = 14.9$  Hz, 0.8H), 2.68 (d,  $J = 15.0$  Hz, 0.8H), 2.41 (d,  $J = 14.1$  Hz, 0.2H), 2.30 (s, 2.5H), 2.28 (s, 0.5H), 1.40 (dt,  $J = 21.0, 7.1$  Hz, 3H);  $^{13}\text{C}$  NMR (125 MHz,  $\text{CDCl}_3$ )  $\delta$  180.7, 179.1, 168.5, 166.9, 160.5, 159.9, 159.6, 159.1, 152.9, 152.7, 141.3, 141.3, 137.9, 136.6, 133.1,

132.9, 132.6, 132.4, 131.8, 131.3, 129.0, 128.8, 127.4, 127.0, 125.8, 125.7, 124.4, 124.2, 124.1, 124.0, 123.8, 123.0, 122.2, 120.9, 120.0, 119.6, 116.6, 116.5, 115.2, 115.1, 102.7, 101.6, 97.1, 95.2, 64.0, 62.8, 46.1, 46.0, 45.9, 44.9, 38.0, 37.5, 18.9, 18.5, 14.1, 14.0; HRMS (ESI)  $m/z$  calcd for  $C_{30}H_{25}NO_7$   $[M+H]^+$  512.1704, found 512.1707.

**(3R)-ethyl 1-benzyl-2'-hydroxy-7-trifluoromethyl-2,5'-dioxo-2',3'-dihydro-5'H-spiro[indoline-3,4'-pyrano[3,2-c]chromene]-2'-carboxylate (3la)**

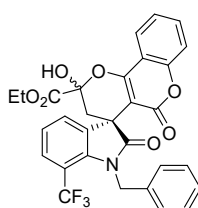

The title compound was prepared according to general working procedure and purified by column chromatography (ethyl acetate:petroleum ether = 1:5 v/v) to give the product as white solid (41.8 mg, 74% yield); m.p. 84 - 86 °C;  $[\alpha]_D^{20} = -20.6$  ( $c = 0.99$ ,  $CHCl_3$ , 90% ee); HPLC: Daicel Chiralpak AD-H, hexane: 2-propanol = 90:10, flow rate = 1.0 mL/min, T = 10 °C, UV = 254 nm,  $t_R = 18.5$  min (minor),  $t_R = 22.5$  min (major);  $^1H$  NMR (500 MHz,  $CDCl_3$ )  $\delta$  8.94 (s, 0.5H), 7.99 (dd,  $J = 8.0, 1.5$  Hz, 0.5H), 7.89 (d,  $J = 6.7$  Hz, 0.5H), 7.85 - 7.70 (m, 0.6H), 7.68 - 7.52 (m, 2H), 7.42 - 7.28 (m, 6.4H), 7.25 - 7.14 (m, 1.4H), 7.14 - 6.95 (m, 0.6H), 5.41 - 5.22 (m, 2H), 5.18 (s, 0.4H), 4.60 - 4.36 (m, 2H), 3.14 (d,  $J = 14.0$  Hz, 0.5H), 2.87 (d,  $J = 14.9$  Hz, 0.5H), 2.68 (d,  $J = 15.0$  Hz, 0.5H), 2.31 (d,  $J = 14.0$  Hz, 0.5H), 1.41 (dt,  $J = 16.6, 7.1$  Hz, 3H);  $^{13}C$  NMR (125 MHz,  $CDCl_3$ )  $\delta$  181.3, 180.7, 168.3, 166.7, 161.0, 160.7, 159.9, 159.5, 152.9, 152.7, 140.8, 140.7, 137.7, 136.4, 135.1, 134.3, 133.1, 132.7, 128.7, 128.5, 127.2, 127.1, 126.2, 125.3, 124.8 ( $^1J_{CF} = 261.9$  Hz), 124.4, 124.3, 123.8, 121.2, 116.7, 116.6, 115.0, 114.9, 114.9 ( $^3J_{CF} = 7.2$  Hz), 103.3, 102.3, 100.9, 100.7, 96.9, 96.9, 95.0, 95.0, 64.2, 62.9, 46.1, 45.8, 45.5, 45.1, 37.6, 37.4 ( $^2J_{CF} = 21.4$  Hz), 37.3, 14.1, 14.0;  $^{19}F$  NMR (470 MHz,  $CDCl_3$ )  $\delta$  -54.2, -54.6; HRMS (ESI)  $m/z$  calcd for  $C_{30}H_{22}F_3NO_7$   $[M+H]^+$  566.1421, found 566.1423.

**(3R)-ethyl 2'-hydroxy-1-methyl-2,5'-dioxo-2',3'-dihydro-5'H-spiro[indoline-3,4'-pyrano[3,2-c]chromene]-2'-carboxylate (3ma)**

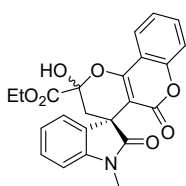

The title compound was prepared according to general working procedure and purified by column chromatography (ethyl acetate:petroleum ether = 1:5 v/v) to give the product as white solid (39.2 mg, 93% yield); m.p. 189 - 191 °C;  $[\alpha]_D^{20} = -20.3$  ( $c = 0.98$ ,  $CHCl_3$ , 94% ee); HPLC: Daicel Chiralpak AD-H, hexane: 2-propanol = 70:30, flow rate = 1.0 mL/min, T = 10 °C, UV = 254 nm,  $t_R = 9.39$  min (minor),  $t_R = 13.7$  min (major);  $^1H$  NMR (500 MHz,  $CDCl_3$ )  $\delta$  9.40 (s, 1H), 7.98 (dd,  $J = 8.0, 1.4$  Hz, 0.8H), 7.79 (dt,  $J = 7.5, 3.8$  Hz, 0.2H), 7.63 - 7.52 (m, 1H), 7.52 - 7.26 (m, 3H), 7.25 - 6.98 (m, 2H), 6.98 - 6.87 (m, 1H), 4.51 - 4.31 (m, 2H), 3.36 (s, 2.5H), 3.34 (s, 0.5H), 3.11 (d,  $J = 14.1$  Hz, 0.2H), 2.84 (d,  $J = 14.9$  Hz, 0.8H), 2.62 (d,  $J = 14.9$  Hz, 0.8H), 2.23 (d,  $J = 14.1$  Hz, 0.2H), 1.39 (dt,  $J = 19.6, 7.1$  Hz, 3H);  $^1H$  NMR (500 MHz, Acetone)  $\delta$  9.26 (s, 0.2H), 7.97 (d,  $J = 7.6$  Hz, 0.5H), 7.87 (d,  $J = 7.7$  Hz, 0.5H), 7.71 - 7.60 (m, 1.7H), 7.47 - 7.33 (m, 1.6H), 7.33 - 7.21 (m, 2H), 7.18 - 7.04 (m, 1H), 7.01 (d,  $J = 7.7$  Hz, 0.5H), 6.95 (t,  $J = 7.4$  Hz, 0.5H), 4.44 - 4.26 (m, 2H), 3.84 (s, 0.3H), 3.34 (s, 1.5H), 3.26 (s, 1.5H), 2.87 (t,  $J = 13.1$  Hz, 1H), 2.76 (d,  $J = 15.0$  Hz, 0.5H), 2.36 (d,  $J = 14.3$  Hz, 0.5H), 1.35 - 1.31 (m, 3H);  $^{13}C$  NMR (125 MHz,  $CDCl_3$ )  $\delta$  179.4, 178.1, 168.5, 167.0, 160.5, 159.9, 159.5, 159.0, 152.9, 152.7,

144.3, 144.2, 132.9, 132.5, 130.9, 130.5, 129.2, 129.0, 128.7, 126.6, 124.2, 124.1, 123.8, 123.0, 122.3, 122.1, 116.6, 116.6, 115.3, 115.1, 109.2, 108.3, 102.7, 101.5, 97.1, 95.1, 64.0, 62.8, 46.5, 45.3, 37.1, 36.5, 27.1, 27.0, 14.1, 14.0; <sup>13</sup>C NMR (125 MHz, Acetone)  $\delta$  209.8, 180.0, 178.1, 168.1, 167.2, 160.7, 159.8, 159.5, 159.4, 153.5, 153.2, 145.3, 145.1, 133.6, 133.2, 132.0, 131.8, 130.3, 129.5, 128.9, 126.9, 124.9, 124.8, 124.1, 123.9, 123.6, 123.0, 122.3, 117.0, 116.9, 115.8, 115.6, 109.8, 108.6, 103.4, 102.3, 97.8, 96.8, 63.1, 62.6, 47.4, 46.1, 38.2, 37.6, 27.0, 26.7, 14.1, 14.0; HRMS (ESI)  $m/z$  calcd for C<sub>23</sub>H<sub>19</sub>NO<sub>7</sub> [M+H]<sup>+</sup> 422.1234, found 422.1239.

**(3R)-ethyl 1-allyl-2'-hydroxy -2,5'-dioxo-2',3'-dihydro-5'H-spiro[indoline-3,4'-pyrano[3,2-c]chromene]-2'-carboxylate (3na)**

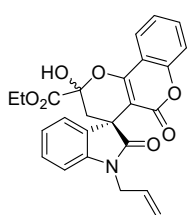

The title compound was prepared according to general working procedure and purified by column chromatography (ethyl acetate:petroleum ether = 1:5 v/v) to give the product as white solid (39.8 mg, 89% yield); m.p. 203 - 209 °C;  $[\alpha]_D^{20} = -10.4$  ( $c = 0.48$ , CHCl<sub>3</sub>, 94% ee); HPLC: Daicel Chiralpak AD-H, hexane: 2-propanol = 70:30, flow rate = 0.9 mL/min, T = 10 °C, UV = 254 nm,  $t_R = 6.15$  min (minor),  $t_R = 10.6$  min (major); <sup>1</sup>H NMR (400 MHz, CDCl<sub>3</sub>)  $\delta$  9.34 (s, 1H), 7.98 (dd,  $J = 8.0, 1.5$  Hz, 0.9H), 7.81 (d,  $J = 7.9$  Hz, 0.1H), 7.68-7.51 (m, 1H), 7.49 - 7.26 (m, 3H), 7.23 - 7.00 (m, 2H), 7.00 - 6.87 (m, 1H), 6.06 - 5.71 (m, 1H), 5.59 - 5.35 (m, 1H), 5.32 - 5.13 (m, 1H), 4.63 - 4.48 (m, 1H), 4.46 - 4.38 (m, 2H), 4.38 - 4.31 (m, 1H), 3.13 (d,  $J = 14.1$  Hz, 0.2H), 2.86 (d,  $J = 14.9$  Hz, 0.8H), 2.63 (d,  $J = 14.9$  Hz, 0.8H), 2.25 (d,  $J = 14.0$  Hz, 0.2H), 1.47 - 1.35 (m, 3H); <sup>13</sup>C NMR (125 MHz, CDCl<sub>3</sub>)  $\delta$  179.4, 177.8, 168.5, 166.9, 160.5, 159.9, 159.5, 159.0, 152.9, 152.7, 143.4, 143.3, 132.9, 132.5, 131.4, 130.9, 130.5, 130.2, 129.1, 129.0, 127.2, 126.6, 124.2, 124.0, 123.8, 123.0, 122.2, 122.1, 118.3, 117.6, 116.6, 116.6, 115.2, 115.0, 110.1, 109.2, 102.7, 101.4, 97.0, 95.2, 64.0, 62.8, 46.5, 45.4, 43.2, 43.1, 37.3, 36.7, 14.1, 14.0; HRMS (ESI)  $m/z$  calcd for C<sub>25</sub>H<sub>21</sub>NO<sub>7</sub> [M+H]<sup>+</sup> 448.1391, found 448.1403.

**(3R)-ethyl 1-(4-bromobenzyl)-2'-hydroxy -2,5'-dioxo-2',3'-dihydro-5'H-spiro[indoline-3,4'-pyrano[3,2-c]chromene]-2'-carboxylate (3oa)**

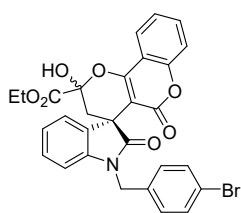

The title compound was prepared according to general working procedure and purified by column chromatography (ethyl acetate:petroleum ether = 1:5 v/v) to give the product as white solid (53.6 mg, 93% yield); m.p. 100 - 103 °C;  $[\alpha]_D^{20} = -80.2$  ( $c = 1.01$ , CHCl<sub>3</sub>, 94% ee); HPLC: Daicel Chiralpak AD-H, hexane: 2-propanol = 70:30, flow rate = 1.0 mL/min, T = 10 °C, UV = 254 nm,  $t_R = 9.63$  min (minor),  $t_R = 18.0$  min (major); <sup>1</sup>H NMR (500 MHz, CDCl<sub>3</sub>)  $\delta$  9.27 (s, 1H), 8.00 (dd,  $J = 8.0, 1.4$  Hz, 0.8H), 7.82 (dd,  $J = 7.9, 1.3$  Hz, 0.2H), 7.61 - 7.55 (m, 1H), 7.49 (t,  $J = 7.7$  Hz, 2H), 7.38 - 7.28 (m, 4H), 7.25 - 7.20 (m, 1H), 7.13 - 6.87 (m, 2H), 6.80 - 6.59 (m, 1H), 5.16 (dd,  $J = 15.9, 11.0$  Hz, 1H), 4.83 (dd,  $J = 15.9, 12.2$  Hz, 1H), 4.51 - 4.27 (m, 2H), 3.15 (d,  $J = 14.0$  Hz, 0.2H), 2.88 (d,  $J = 15.0$  Hz, 0.8H), 2.65 (d,  $J = 15.0$  Hz, 0.8H), 2.28 (d,  $J = 14.0$  Hz, 0.2H), 1.41 (dt,  $J = 16.6, 7.1$  Hz, 3H); <sup>13</sup>C NMR (125 MHz, CDCl<sub>3</sub>)  $\delta$  179.8, 178.1, 168.4, 166.9, 160.7, 160.0, 159.7, 159.2, 153.0, 152.7, 142.9, 142.9, 133.6, 133.0, 132.6, 132.1, 131.9, 130.9, 129.2, 129.1, 129.0, 128.6, 128.5, 128.3, 127.0, 126.8, 126.0,

125.8, 124.3, 124.1, 123.9, 122.5, 122.2, 121.9, 116.7, 116.6, 115.2, 115.0, 110.2, 109.3, 102.4, 101.3, 97.0, 95.2, 64.1, 62.9, 46.6, 45.5, 44.2, 44.0, 37.5, 36.9, 14.2, 14.1; HRMS (ESI)  $m/z$  calcd for  $C_{29}H_{22}BrNO_7$   $[M+H]^+$  576.0652, found 576.0665.

**(3R)-ethyl 2'-hydroxy-1-(4-methylbenzyl)-2,5'-dioxo-2',3'-dihydro-5'H-spiro[indoline-3,4'-pyrano[3,2-c]chromene]-2'-carboxylate (3pa)**

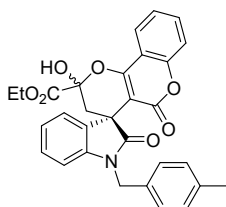

The title compound was prepared according to general working procedure and purified by column chromatography (ethyl acetate:petroleum ether = 1:5 v/v) to give the product as white solid (47.0 mg, 92% yield); m.p. 229 - 231 °C;  $[\alpha]_D^{20} = -5.2$  ( $c = 1.00$ ,  $CHCl_3$ , 93% ee); HPLC: Daicel Chiralpak AD-H, hexane: 2-propanol = 70:30, flow rate = 1.0 mL/min,  $T = 10$  °C, UV = 254 nm,  $t_R = 8.51$  min (minor),  $t_R = 17.0$  min (major);  $^1H$  NMR (500 MHz,  $CDCl_3$ )  $\delta$  9.40 (s, 1H), 8.00 (dd,  $J = 8.0, 1.5$  Hz, 0.8H), 7.82 (dd,  $J = 7.9, 1.3$  Hz, 0.2H), 7.61 – 7.50 (m, 1H), 7.37 – 7.27 (m, 4H), 7.24 – 7.14 (m, 3H), 7.11 – 6.91 (m, 2H), 6.85 – 6.65 (m, 1H), 5.18 – 5.02 (m, 1H), 5.01 – 4.88 (m, 1H), 4.58 – 4.31 (m, 2H), 3.17 (d,  $J = 14.0$  Hz, 0.2H), 2.88 (d,  $J = 14.9$  Hz, 0.8H), 2.65 (d,  $J = 15.0$  Hz, 0.8H), 2.33 (s, 3H), 2.28 (d,  $J = 14.0$  Hz, 0.2H), 1.41 (dt,  $J = 17.3, 7.1$  Hz, 3H);  $^{13}C$  NMR (125 MHz,  $CDCl_3$ )  $\delta$  179.7, 178.0, 168.6, 167.0, 160.6, 159.9, 159.6, 159.1, 153.0, 152.8, 143.4, 143.3, 137.6, 137.1, 132.9, 132.7, 132.5, 131.6, 131.0, 130.5, 129.6, 129.5, 129.1, 128.5, 128.5, 128.3, 127.3, 127.3, 126.0, 125.8, 124.3, 124.1, 123.8, 123.0, 122.2, 122.1, 116.7, 116.6, 115.2, 115.1, 110.4, 109.5, 102.6, 101.4, 97.1, 95.2, 64.1, 62.9, 46.6, 45.6, 44.6, 44.4, 37.5, 21.2, 14.2, 14.1; HRMS (ESI)  $m/z$  calcd for  $C_{30}H_{25}NO_7$   $[M+H]^+$  512.1704, found 512.1704.

**(3R)-ethyl 2'-hydroxy-1-(4-trifluoromethylbenzyl)-2,5'-dioxo-2',3'-dihydro-5'H-spiro[indoline-3,4'-pyrano[3,2-c]chromene]-2'-carboxylate (3qa)**

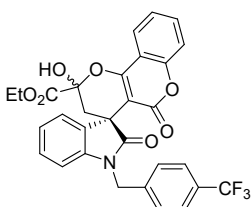

The title compound was prepared according to general working procedure and purified by column chromatography (ethyl acetate:petroleum ether = 1:5 v/v) to give the product as white solid (52.0 mg, 92% yield); m.p. 118 - 121 °C;  $[\alpha]_D^{20} = -39.6$  ( $c = 1.03$ ,  $CHCl_3$ , 95% ee); HPLC: Daicel Chiralpak AD-H, hexane: 2-propanol = 70:30, flow rate = 1.0 mL/min,  $T = 10$  °C, UV = 254 nm,  $t_R = 7.65$  min (minor),  $t_R = 15.1$  min (major);  $^1H$  NMR (500 MHz,  $CDCl_3$ )  $\delta$  9.22 (s, 1H), 8.00 (dd,  $J = 8.0, 1.5$  Hz, 0.8H), 7.83 (dd,  $J = 7.9, 1.4$  Hz, 0.2H), 7.70 – 7.54 (m, 5H), 7.39 – 7.28 (m, 2H), 7.25 – 7.13 (m, 1H), 7.12 – 6.92 (m, 2H), 6.85 – 6.61 (m, 1H), 5.42 – 5.15 (m, 1H), 5.03 – 4.78 (m, 1H), 4.56 – 4.20 (m, 2H), 3.16 (d,  $J = 14.0$  Hz, 0.2H), 2.90 (d,  $J = 15.0$  Hz, 0.8H), 2.68 (d,  $J = 15.0$  Hz, 0.8H), 2.30 (d,  $J = 14.0$  Hz, 0.2H), 1.41 (dt,  $J = 17.1, 7.1$  Hz, 3H);  $^{13}C$  NMR (125 MHz,  $CDCl_3$ )  $\delta$  179.9, 178.2, 168.4, 166.8, 160.7, 160.1, 159.7, 159.3, 153.0, 152.7, 142.8, 139.8, 138.7, 138.1, 133.1, 132.7, 130.9, 130.4, 130.1 ( $^2J_{CF} = 32.5$  Hz), 129.2, 128.6, 127.5, 127.5, 126.8, 126.0 ( $^4J_{CF} = 3.6$  Hz), 124.4, 124.4, 124.2, 124.0 ( $^1J_{CF} = 272.1$  Hz), 123.9, 123.0, 122.6, 122.3, 116.7, 116.7, 115.2, 115.0, 110.0, 109.2, 102.3, 101.2, 97.0, 95.2, 64.1, 62.9, 46.6, 45.5, 44.3, 44.1, 37.5, 36.9, 14.1, 14.1;  $^{19}F$  NMR (470 MHz,  $CDCl_3$ )  $\delta$  -62.5, -62.6; HRMS (ESI)  $m/z$  calcd for  $C_{30}H_{22}F_3NO_7$   $[M+H]^+$  566.1421, found 566.1423.

**(3R)-ethyl 1-benzyl-2'-hydroxy-9'-methyl-2,5'-dioxo-2',3'-dihydro-5'H-spiro[indoline-3,4'-pyrano[3,2-c]chromene]-2'-carboxylate (3ab)**

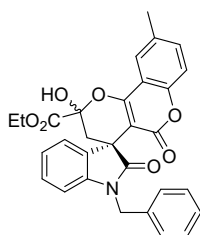

The title compound was prepared according to general working procedure and purified by column chromatography (ethyl acetate:petroleum ether = 1:5 v/v) to give the product as white solid (46.0 mg, 90% yield); m.p. 115 - 122 °C;  $[\alpha]_D^{20} = -125.5$  ( $c = 0.93$ ,  $\text{CHCl}_3$ , 94% ee); HPLC: Daicel Chiralpak AD-H, hexane: 2-propanol = 80:20, flow rate = 1.0 mL/min,  $T = 10$  °C, UV = 254 nm,  $t_R = 15.2$  min (minor),  $t_R = 37.7$  min (major);  $^1\text{H NMR}$  (500 MHz,  $\text{CDCl}_3$ )  $\delta$  9.34 (s, 1H), 7.80 – 7.75 (m, 0.8H), 7.67 – 7.61 (m, 0.2H), 7.50 – 7.42 (m, 2H), 7.41 – 7.33 (m, 3H), 7.32 – 7.28 (m, 1H), 7.24 – 7.13 (m, 2H), 7.12 – 7.01 (m, 1.7H), 6.98 – 6.84 (m, 0.3H), 6.81 – 6.75 (m, 0.8H), 6.73 – 6.68 (m, 0.2H), 5.19 – 5.06 (m, 1H), 5.05 – 4.92 (m, 1H), 4.60 – 4.34 (m, 2H), 3.18 (d,  $J = 14.0$  Hz, 0.2H), 2.87 (d,  $J = 14.9$  Hz, 0.8H), 2.65 (d,  $J = 14.9$  Hz, 0.8H), 2.44 (s, 2.4H), 2.43 (s, 0.4H), 2.28 (d,  $J = 14.0$  Hz, 0.2H), 1.50 – 1.35 (m, 3H);  $^{13}\text{C NMR}$  (125 MHz,  $\text{CDCl}_3$ )  $\delta$  179.8, 178.1, 168.7, 167.0, 160.6, 160.1, 159.1, 159.8, 151.1, 150.9, 143.3, 143.2, 135.7, 134.7, 134.1, 134.0, 133.9, 133.6, 131.1, 130.5, 129.1, 129.0, 128.4, 127.9, 127.5, 127.2, 127.2, 126.6, 125.9, 124.1, 123.4, 122.6, 122.1, 116.5, 116.4, 114.9, 114.7, 110.3, 109.4, 102.4, 101.2, 97.0, 95.1, 64.1, 62.9, 53.5, 46.6, 45.5, 44.8, 44.6, 37.5, 37.0, 21.1, 21.0, 14.2, 14.1; HRMS (ESI)  $m/z$  calcd for  $\text{C}_{30}\text{H}_{25}\text{NO}_7$   $[\text{M}+\text{H}]^+$  512.1704, found 512.1701.

**(3R)-ethyl 1-benzyl-9'-chloro-2'-hydroxy-2,5'-dioxo-2',3'-dihydro-5'H-spiro[indoline-3,4'-pyrano[3,2-c]chromene]-2'-carboxylate (3ac)**

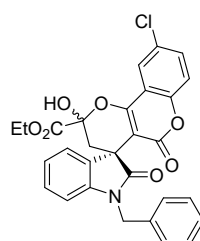

The title compound was prepared according to general working procedure and purified by column chromatography (ethyl acetate:petroleum ether = 1:5 v/v) to give the product as white solid (47.9 mg, 90% yield); m.p. 255 - 257 °C;  $[\alpha]_D^{20} = +62.6$  ( $c = 1.02$ ,  $\text{CHCl}_3$ , 90% ee); HPLC: Daicel Chiralpak AD-H, hexane: 2-propanol = 80:20, flow rate = 1.0 mL/min,  $T = 10$  °C, UV = 254 nm,  $t_R = 14.3$  min (minor),  $t_R = 25.2$  min (major);  $^1\text{H NMR}$  (500 MHz,  $\text{CDCl}_3$ )  $\delta$  9.37 (s, 1H), 7.96 (d,  $J = 2.5$  Hz, 0.8H), 7.78 (d,  $J = 2.5$  Hz, 0.2H), 7.59 – 7.50 (m, 1H), 7.47 – 7.33 (m, 4H), 7.33 – 7.27 (m, 1H), 7.25 – 7.13 (m, 2H), 7.10 – 6.91 (m, 2H), 6.85 – 6.68 (m, 1H), 5.18 – 5.06 (m, 1H), 5.04 – 4.92 (m, 1H), 4.56 – 4.31 (m, 2H), 3.17 (d,  $J = 14.0$  Hz, 0.2H), 2.88 (d,  $J = 15.0$  Hz, 0.8H), 2.66 (d,  $J = 15.0$  Hz, 0.8H), 2.30 (d,  $J = 14.0$  Hz, 0.2H), 1.46 – 1.35 (m, 3H);  $^{13}\text{C NMR}$  (125 MHz,  $\text{CDCl}_3$ )  $\delta$  179.5, 177.8, 168.3, 166.7, 159.6, 159.4, 159.0, 158.1, 151.3, 151.1, 143.3, 143.2, 135.6, 134.6, 132.9, 132.5, 130.7, 130.2, 129.9, 129.7, 129.2, 129.0, 128.8, 128.7, 127.9, 127.5, 127.2, 127.2, 126.6, 124.2, 123.4, 122.6, 122.3, 122.1, 118.2, 118.1, 116.4, 116.2, 110.4, 109.5, 103.5, 102.3, 97.3, 95.4, 64.3, 63.0, 46.6, 45.5, 44.8, 44.6, 37.4, 36.9, 14.1, 14.1; HRMS (ESI)  $m/z$  calcd for  $\text{C}_{29}\text{H}_{22}\text{ClNO}_7$   $[\text{M}+\text{H}]^+$  532.1158, found 532.1161.

**(3R)-ethyl 1-benzyl-9'-bromo-2'-hydroxy-2,5'-dioxo-2',3'-dihydro-5'H-spiro[indoline-3,4'-pyrano[3,2-c]chromene]-2'-carboxylate (3ad)**

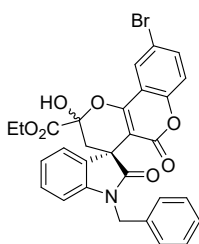

The title compound was prepared according to general working procedure and purified by column chromatography (ethyl acetate:petroleum ether = 1:5 v/v) to give the product as white solid (51.3 mg, 89% yield); m.p. 243 - 246 °C;  $[\alpha]_D^{20} = +3.9$  ( $c = 1.03$ ,  $\text{CHCl}_3$ , 95% ee); HPLC: Daicel Chiralpak OD-H, hexane: 2-propanol = 65:35, flow rate = 0.9 mL/min,  $T = 10$  °C, UV = 254 nm,  $t_R = 10.7$  min (minor),  $t_R = 22.0$  min (major);  $^1\text{H NMR}$  (500 MHz,  $\text{CDCl}_3$ )  $\delta$  9.39 (s, 0.5H), 8.10 (d,  $J = 2.3$  Hz, 0.6H), 7.93 (d,  $J = 2.3$  Hz, 0.4H), 7.65 (ddd,  $J = 17.0, 8.6, 2.3$  Hz, 1.4H), 7.51 – 7.33 (m, 4H), 7.29 (dd,  $J = 11.8, 7.3$  Hz, 1H), 7.25 – 7.11 (m, 2H), 7.06 (dd,  $J = 7.8, 5.3$  Hz, 1H), 6.94 (t,  $J = 7.6$  Hz, 0.4H), 6.84 – 6.67 (m, 1H), 5.25 (s, 0.4H), 5.20 – 5.05 (m, 1H), 5.04 – 4.90 (m, 1H), 4.58 – 4.29 (m, 2H), 3.17 (dd,  $J = 14.0, 1.5$  Hz, 0.4H), 2.88 (d,  $J = 15.0$  Hz, 0.6H), 2.66 (d,  $J = 15.0$  Hz, 0.6H), 2.30 (d,  $J = 14.0$  Hz, 0.4H), 1.41 (dt,  $J = 14.2, 7.1$  Hz, 3H);  $^{13}\text{C NMR}$  (125 MHz,  $\text{CDCl}_3$ )  $\delta$  179.5, 177.8, 168.2, 166.7, 159.5, 159.3, 158.9, 158.0, 151.7, 151.5, 143.2, 143.2, 135.7, 135.6, 135.3, 134.5, 130.6, 130.1, 129.2, 128.9, 128.7, 128.6, 127.9, 127.5, 127.2, 127.1, 126.6, 126.3, 125.5, 124.2, 122.3, 122.0, 118.4, 118.3, 117.1, 116.9, 116.7, 116.6, 110.4, 109.5, 103.4, 102.2, 97.3, 95.3, 77.3, 77.2, 77.0, 76.8, 64.2, 63.0, 46.5, 45.4, 44.8, 44.6, 37.3, 36.8, 14.1, 14.0; HRMS (ESI)  $m/z$  calcd for  $\text{C}_{29}\text{H}_{22}\text{BrNO}_7$   $[\text{M}+\text{H}]^+$  576.0652, found 576.0670.

**(3R)-ethyl 1-benzyl-9'-fluoro-2'-hydroxy-2,5'-dioxo-2',3'-dihydro-5'H-spiro[indoline-3,4'-pyrano[3,2-c]chromene]-2'-carboxylate (3ae)**

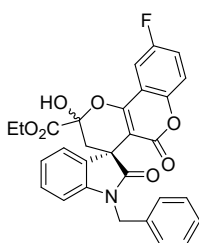

The title compound was prepared according to general working procedure and purified by column chromatography (ethyl acetate:petroleum ether = 1:5 v/v) to give the product as white solid (46.9 mg, 91% yield); m.p. 97 - 100 °C;  $[\alpha]_D^{20} = -15.9$  ( $c = 1.03$ ,  $\text{CHCl}_3$ , 93% ee); HPLC: Daicel Chiralpak AD-H, hexane: 2-propanol = 80:20, flow rate = 1.0 mL/min,  $T = 10$  °C, UV = 254 nm,  $t_R = 14.6$  min (minor),  $t_R = 17.7$  min (major);  $^1\text{H NMR}$  (500 MHz,  $\text{CDCl}_3$ )  $\delta$  9.38 (s, 1H), 7.65 (td,  $J = 8.6, 1.7$  Hz, 1H), 7.44 (dd,  $J = 9.5, 8.2$  Hz, 2H), 7.37 (t,  $J = 7.5$  Hz, 2H), 7.33 – 7.26 (m, 3H), 7.24 – 7.17 (m, 1H), 7.10 – 6.89 (m, 2H), 6.84 – 6.65 (m, 1H), 5.18 – 5.07 (m, 1H), 5.04 – 4.91 (m, 1H), 4.50 – 4.35 (m, 2H), 3.17 (d,  $J = 14.0$  Hz, 0.2H), 2.89 (d,  $J = 15.0$  Hz, 0.8H), 2.67 (d,  $J = 15.0$  Hz, 0.8H), 2.30 (d,  $J = 14.0$  Hz, 0.2H), 1.41 (dt,  $J = 16.1, 7.1$  Hz, 3H);  $^{13}\text{C NMR}$  (125 MHz,  $\text{CDCl}_3$ )  $\delta$  179.6, 177.9, 168.3, 166.8, 159.8 ( $^4J_{\text{CF}} = 2.3$  Hz), 159.3, 159.2, 158.8 ( $^1J_{\text{CF}} = 244.6$  Hz), 158.7 ( $^1J_{\text{CF}} = 235.9$  Hz), 158.4 ( $^4J_{\text{CF}} = 2.5$  Hz), 149.1 ( $^4J_{\text{CF}} = 1.6$  Hz), 148.9 ( $^4J_{\text{CF}} = 1.3$  Hz), 143.3, 143.2, 135.6, 134.6, 130.7, 130.2, 129.2, 129.0, 128.8, 128.6, 127.9, 127.5, 127.2, 127.2, 126.6, 126.0, 125.8, 124.2, 122.3, 122.1, 120.5 ( $^2J_{\text{CF}} = 24.6$  Hz), 120.0 ( $^2J_{\text{CF}} = 24.6$  Hz), 118.4 ( $^3J_{\text{CF}} = 7.9$  Hz), 118.3 ( $^3J_{\text{CF}} = 8.2$  Hz), 116.2 ( $^3J_{\text{CF}} = 9.1$  Hz), 116.0 ( $^3J_{\text{CF}} = 9.2$  Hz), 110.4, 109.6 ( $^2J_{\text{CF}} = 25.6$  Hz), 108.9 ( $^2J_{\text{CF}} = 25.7$  Hz), 103.4, 102.2, 97.3, 95.4, 64.2, 63.0, 46.6, 45.5, 44.8, 44.6, 37.4, 36.9, 14.2, 14.1;  $^{19}\text{F NMR}$  (470 MHz,  $\text{CDCl}_3$ )  $\delta$  -116.6, -116.9; HRMS (ESI)  $m/z$  calcd for  $\text{C}_{29}\text{H}_{22}\text{FNO}_7$   $[\text{M}+\text{H}]^+$  516.1453, found 516.1458.

**(3R)-ethyl 1-benzyl-2'-hydroxy-9'-methoxy-2,5'-dioxo-2',3'-dihydro-5'H-spiro[indoline-3,4'-pyrano[3,2-c]chromene]-2'-carboxylate (3af)**

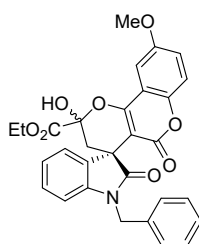

The title compound was prepared according to general working procedure and purified by column chromatography (ethyl acetate:petroleum ether = 1:5 v/v) to give the product as white solid (44.3 mg, 84% yield); m.p. 101 - 104 °C;  $[\alpha]_D^{20} = -37.1$  ( $c = 0.97$ ,  $\text{CHCl}_3$ , 92% ee); HPLC: Daicel Chiralpak OD-H, hexane: 2-propanol = 65:35, flow rate = 0.9 mL/min,  $T = 10$  °C, UV = 254 nm,  $t_R = 11.4$  min (minor),  $t_R = 31.5$  min (major);  $^1\text{H NMR}$  (500 MHz,  $\text{CDCl}_3$ )  $\delta$  9.33 (s, 1H), 7.88 (d,  $J = 8.9$  Hz, 0.8H), 7.70 (d,  $J = 8.8$  Hz, 0.2H), 7.51 - 7.40 (m, 2H), 7.37 (t,  $J = 7.5$  Hz, 2H), 7.31 - 7.27 (m, 1H), 7.21 (td,  $J = 7.7$ , 1.6 Hz, 1H), 7.16 - 7.01 (m, 2H), 6.92 - 6.84 (m, 1H), 6.81 - 6.67 (m, 2H), 5.17 - 5.07 (m, 1H), 5.04 - 4.93 (m, 1H), 4.50 - 4.35 (m, 2H), 3.87 (s, 2.5H), 3.86 (s, 0.4H), 3.15 (d,  $J = 14.0$  Hz, 0.2H), 2.85 (d,  $J = 13.2$  Hz, 0.8H), 2.63 (d,  $J = 14.9$  Hz, 0.8H), 2.27 (d,  $J = 14.0$  Hz, 0.2H), 1.42 (t,  $J = 7.1$  Hz, 3H);  $^{13}\text{C NMR}$  (125 MHz,  $\text{CDCl}_3$ )  $\delta$  180.0, 178.3, 168.5, 167.0, 163.7, 163.4, 160.9, 160.4, 160.0, 159.4, 154.9, 154.6, 143.3, 143.2, 135.8, 134.7, 131.3, 130.9, 129.0, 129.0, 128.8, 128.5, 128.4, 128.4, 127.8, 127.4, 127.2, 126.6, 126.0, 125.9, 125.0, 124.1, 122.2, 122.1, 112.6, 112.5, 110.3, 109.4, 108.5, 108.3, 100.3, 98.6, 97.0, 95.1, 64.0, 62.8, 55.8, 55.8, 46.5, 45.4, 44.8, 44.6, 37.5, 37.0, 14.1, 14.1; HRMS (ESI)  $m/z$  calcd for  $\text{C}_{30}\text{H}_{25}\text{NO}_8$   $[\text{M}+\text{H}]^+ 528.1653$ , found 528.1653.

**(3R)-ethyl 1-benzyl-2'-hydroxy-8'-methyl-2,5'-dioxo-2',3'-dihydro-5'H-spiro[indoline-3,4'-pyrano[3,2-c]chromene]-2'-carboxylate (3ag)**

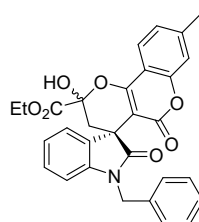

The title compound was prepared according to general working procedure and purified by column chromatography (ethyl acetate:petroleum ether = 1:5 v/v) to give the product as white solid (47.1 mg, 92% yield); m.p. 93 - 97 °C;  $[\alpha]_D^{20} = -24.2$  ( $c = 0.99$ ,  $\text{CHCl}_3$ , 92% ee); HPLC: Daicel Chiralpak AD-H, hexane: 2-propanol = 70:30, flow rate = 0.8 mL/min,  $T = 10$  °C, UV = 254 nm,  $t_R = 22.1$  min (minor),  $t_R = 74.8$  min (major);  $^1\text{H NMR}$  (500 MHz,  $\text{CDCl}_3$ )  $\delta$  9.34 (s, 1H), 7.86 (d,  $J = 8.1$  Hz, 0.8H), 7.69 (d,  $J = 8.1$  Hz, 0.2H), 7.44 (d,  $J = 7.5$  Hz, 2H), 7.37 (t,  $J = 7.5$  Hz, 2H), 7.31 - 7.28 (m, 1H), 7.24 - 7.18 (m, 1H), 7.15 (d,  $J = 8.0$  Hz, 1H), 7.11 - 6.90 (m, 3H), 6.80 - 6.69 (m, 1H), 5.20 - 5.05 (m, 1H), 5.04 - 4.92 (m, 1H), 4.47 - 4.35 (m, 2H), 3.16 (d,  $J = 14.0$  Hz, 0.2H), 2.87 (d,  $J = 14.9$  Hz, 0.8H), 2.65 (d,  $J = 14.9$  Hz, 0.8H), 2.46 (s, 2.5H), 2.44 (s, 0.5H), 2.28 (d,  $J = 14.0$  Hz, 0.2H), 1.42 (dd,  $J = 9.2$ , 5.0 Hz, 3H);  $^{13}\text{C NMR}$  (125 MHz,  $\text{CDCl}_3$ )  $\delta$  179.9, 178.2, 168.6, 167.0, 160.8, 160.2, 159.9, 159.3, 153.1, 152.9, 144.3, 143.8, 143.3, 143.2, 135.8, 134.7, 131.2, 130.6, 129.0, 129.0, 128.8, 128.4, 127.8, 127.5, 127.2, 127.2, 125.9, 125.5, 125.3, 124.1, 123.5, 122.7, 122.2, 122.1, 116.8, 116.7, 112.7, 112.6, 110.3, 109.4, 101.5, 100.4, 97.0, 95.0, 64.0, 62.8, 46.6, 45.4, 44.8, 44.6, 37.5, 37.0, 21.9, 21.8, 14.1, 14.1; HRMS (ESI)  $m/z$  calcd for  $\text{C}_{30}\text{H}_{25}\text{NO}_7$   $[\text{M}+\text{H}]^+ 512.1704$ , found 512.1713.

**(3R)-ethyl 1-benzyl-2'-hydroxy-7'-methyl-2,5'-dioxo-2',3'-dihydro-5'H-spiro[indoline-3,4'-pyrano[4,3-b]pyran]-2'-carboxylate (3ah)**

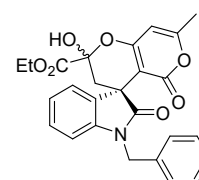

The title compound was prepared according to general working procedure and purified by column chromatography (ethyl acetate:petroleum ether = 1:5 v/v) to give the product as white solid

(41.1 mg, 89% yield); m.p. 183 - 186 °C;  $[\alpha]_D^{20} = -38.4$  ( $c = 0.99$ ,  $\text{CHCl}_3$ , 90% ee); HPLC: Daicel Chiralpak OD-H, hexane: 2-propanol = 70:30, flow rate = 1.0 mL/min,  $T = 10$  °C, UV = 260 nm,  $t_R = 10.8$  min (minor),  $t_R = 17.7$  min (major);  $^1\text{H}$  NMR (400 MHz,  $\text{CDCl}_3$ )  $\delta$  9.26 (s, 1H), 7.44 – 7.39 (m, 2H), 7.35 (t,  $J = 7.4$  Hz, 2H), 7.28 (d,  $J = 7.2$  Hz, 1H), 7.24 – 7.16 (m, 1H), 7.12 – 6.96 (m, 2H), 6.81 – 6.64 (m, 1H), 6.00 (s, 0.9H), 5.87 (s, 0.1H), 5.12 (d,  $J = 15.9$  Hz, 1H), 4.92 (d,  $J = 15.9$  Hz, 1H), 4.38 – 4.30 (m, 2H), 3.04 (d,  $J = 14.0$  Hz, 0.1H), 2.77 (d,  $J = 15.0$  Hz, 0.9H), 2.56 (d,  $J = 15.0$  Hz, 0.9H), 2.30 (d,  $J = 14.0$  Hz, 0.1H), 2.21 (s, 2.6H), 2.19 (s, 0.4H), 1.41 – 1.32 (m, 3H);  $^{13}\text{C}$  NMR (100 MHz,  $\text{CDCl}_3$ )  $\delta$  179.8, 178.1, 168.5, 166.9, 164.9, 162.8, 162.0, 161.1, 143.2, 143.1, 135.7, 134.6, 130.8, 130.3, 128.9, 128.9, 128.7, 128.3, 127.8, 127.4, 127.1, 126.5, 126.0, 125.7, 124.0, 123.8, 122.2, 122.0, 110.2, 109.3, 100.7, 100.1, 98.6, 97.0, 96.7, 94.8, 63.9, 62.8, 45.9, 44.8, 44.7, 44.5, 37.2, 36.8, 19.9, 19.9, 14.0, 14.0; HRMS (ESI)  $m/z$  calcd for  $\text{C}_{26}\text{H}_{23}\text{NO}_7$   $[\text{M}+\text{H}]^+$  462.1547, found 462.1554.

**(3R)-ethyl 1-benzyl-2'-hydroxy-6'-methyl-2,5'-dioxo-2',3',5',6'-tetrahydrospiro[indoline-3,4'-pyrano[3,2-c]quinoline]-2'-carboxylate (3ai)**

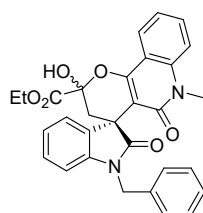

The title compound was prepared according to general working procedure and purified by column chromatography (ethyl acetate:petroleum ether = 1:5 v/v) to give the product as white solid (30.6 mg, 60% yield); m.p. 114 - 117 °C;  $[\alpha]_D^{20} = +2.3$  ( $c = 1.02$ ,  $\text{CHCl}_3$ , 90% ee); HPLC: Daicel Chiralpak AD-H, hexane: 2-propanol = 70:30, flow rate = 1.0 mL/min,  $T = 10$  °C, UV = 260 nm,  $t_R = 6.74$  min (minor),  $t_R = 15.9$  min (major);  $^1\text{H}$  NMR (500 MHz,  $\text{CDCl}_3$ )  $\delta$  9.10 (s, 0.7H), 8.16 (dd,  $J = 8.0, 1.3$  Hz, 0.7H), 8.00 (dd,  $J = 8.0, 1.3$  Hz, 0.3H), 7.66 – 7.55 (m, 1H), 7.52 – 7.27 (m, 7H), 7.23 – 7.16 (m, 1H), 7.16 – 6.89 (m, 2H), 6.85 – 6.69 (m, 1H), 5.29 – 5.07 (m, 1H), 5.05 – 4.98 (m, 1H), 4.95 (s, 0.3H), 4.55 – 4.32 (m, 2H), 3.58 (s, 1H), 3.55 (s, 2H), 3.16 (d,  $J = 13.8$  Hz, 0.3H), 2.88 (d,  $J = 14.8$  Hz, 0.7H), 2.63 (d,  $J = 14.9$  Hz, 0.7H), 2.28 (d,  $J = 13.8$  Hz, 0.3H), 1.41 (dt,  $J = 21.2, 7.1$  Hz, 3H);  $^{13}\text{C}$  NMR (125 MHz,  $\text{CDCl}_3$ )  $\delta$  180.7, 179.5, 169.2, 167.5, 160.7, 160.5, 156.9, 155.5, 143.4, 143.3, 139.5, 139.3, 136.2, 135.2, 132.5, 131.8, 131.5, 131.4, 128.9, 128.8, 128.6, 128.2, 127.8, 127.4, 127.3, 127.2, 126.4, 124.1, 123.9, 123.4, 122.1, 122.0, 121.9, 121.8, 115.8, 115.5, 113.9, 113.9, 109.9, 109.2, 107.6, 106.9, 96.3, 94.7, 63.8, 62.7, 47.3, 46.1, 44.7, 44.5, 38.2, 37.1, 29.7, 29.5, 14.2, 14.1; HRMS (ESI)  $m/z$  calcd for  $\text{C}_{30}\text{H}_{26}\text{N}_2\text{O}_6$   $[\text{M}+\text{H}]^+$  511.1864, found 511.1866.

**(3R)-ethyl 1-benzyl-2',8'-dihydroxy-2,5'-dioxo-2',3'-dihydro-5'H-spiro[indoline-3,4'-pyrano[3,2-c]chromene]-2'-carboxylate (3aj)**

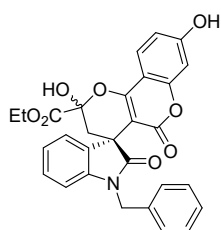

The title compound was prepared according to general working procedure and purified by column chromatography (ethyl acetate:petroleum ether = 1:2 v/v) to give the product as light yellow solid (25.7 mg, 50% yield); m.p. 150 - 153 °C;  $[\alpha]_D^{20} = -8.6$  ( $c = 0.50$ ,  $\text{CHCl}_3$ , 91% ee); HPLC: Daicel Chiralpak AD-H, hexane: 2-propanol = 70:30, flow rate = 1.0 mL/min,  $T = 10$  °C, UV = 254 nm,  $t_R = 4.86$  min (minor),  $t_R = 6.98$  min (major);  $^1\text{H}$  NMR (500 MHz,  $\text{CDCl}_3$ )  $\delta$  9.39 (s, 0.6H), 8.96 (s, 0.3H), 8.39 (s, 0.6H), 7.77 – 7.59 (m, 1H), 7.58 – 7.26 (m, 5H), 7.25 – 6.89 (m, 3H), 6.86 – 6.45 (m, 3H), 5.27 (s, 0.3H), 5.21 – 4.89 (m,



2H), 4.62 – 4.33 (m, 2H), 3.19 (d, J = 13.9, 1.8 Hz, 0.3H), 2.89 (d, J = 15.2 Hz, 0.7H), 2.63 (d, J = 14.6, 0.7H), 2.26 (d, J = 13.9 Hz, 0.3H), 1.47 – 1.37 (m, 3H); <sup>13</sup>C NMR (125 MHz, CDCl<sub>3</sub>) δ 180.3, 180.1, 168.4, 167.3, 161.5, 161.5, 161.2, 161.1, 161.1, 160.1, 154.5, 154.0, 143.1, 142.6, 135.2, 134.6, 131.2, 131.0, 129.1, 129.0, 128.9, 128.6, 127.9, 127.7, 127.3, 126.7, 125.1, 125.1, 124.3, 124.2, 122.9, 122.1, 113.5, 113.2, 110.4, 109.8, 107.6, 106.9, 102.7, 102.4, 98.2, 97.8, 97.0, 95.1, 64.0, 63.1, 46.4, 45.7, 44.8, 44.8, 37.4, 36.4, 14.2, 14.1; HRMS (ESI) m/z calcd for C<sub>29</sub>H<sub>23</sub>NO<sub>8</sub>[M+H]<sup>+</sup> 514.1496, found 514.1502.

**(S)-(1-(2-methoxy-3-(trifluoromethyl)benzyl)pyrrolidin-2-yl)diphenylmethanol**  
**(L<sub>6</sub>)**

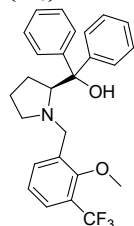

The title compound was prepared according to the general working procedure and purified by column chromatography (petroleum ether: ethyl acetate = 10:1 v/v) to give the product as a colorless oil (21.8 mg, 99% yield). <sup>1</sup>H NMR (500 MHz, CDCl<sub>3</sub>) δ 7.69 (d, J = 7.5 Hz, 2H), 7.66 – 7.57 (m, 2H), 7.52 (d, J = 7.6 Hz, 1H), 7.43 (d, J = 7.6 Hz, 1H), 7.31 (t, J = 7.7 Hz, 2H), 7.26 – 7.11 (m, 4H), 7.06 (t, J = 7.3 Hz, 1H), 4.85 (s, 1H), 4.05 (dd, J = 9.2, 5.2 Hz, 1H), 3.57 – 3.40 (m, 4H), 3.11 (d, J = 14.2 Hz, 1H), 3.03 – 2.88 (m, 1H), 2.33 (dd, J = 16.8, 9.2 Hz, 1H), 2.05 – 1.93 (m, 1H), 1.85 – 1.74 (m, 1H), 1.74 – 1.62 (m, 2H); <sup>13</sup>C NMR (125 MHz, CDCl<sub>3</sub>) δ 156.0, 147.9, 146.4, 134.8, 133.3, 128.20, 128.1, 126.5, 126.4, 125.6, 125.5, 123.9, 77.9, 71.3, 62.5, 55.6, 53.6, 29.6, 24.2; <sup>19</sup>F NMR (470 MHz, CDCl<sub>3</sub>) δ -60.9; HRMS (ESI) m/z calcd for C<sub>26</sub>H<sub>27</sub>F<sub>3</sub>NO<sub>2</sub>[M+H]<sup>+</sup> 442.1988, found 442.1996.

## 1.6 Control experiments and DFT calculations

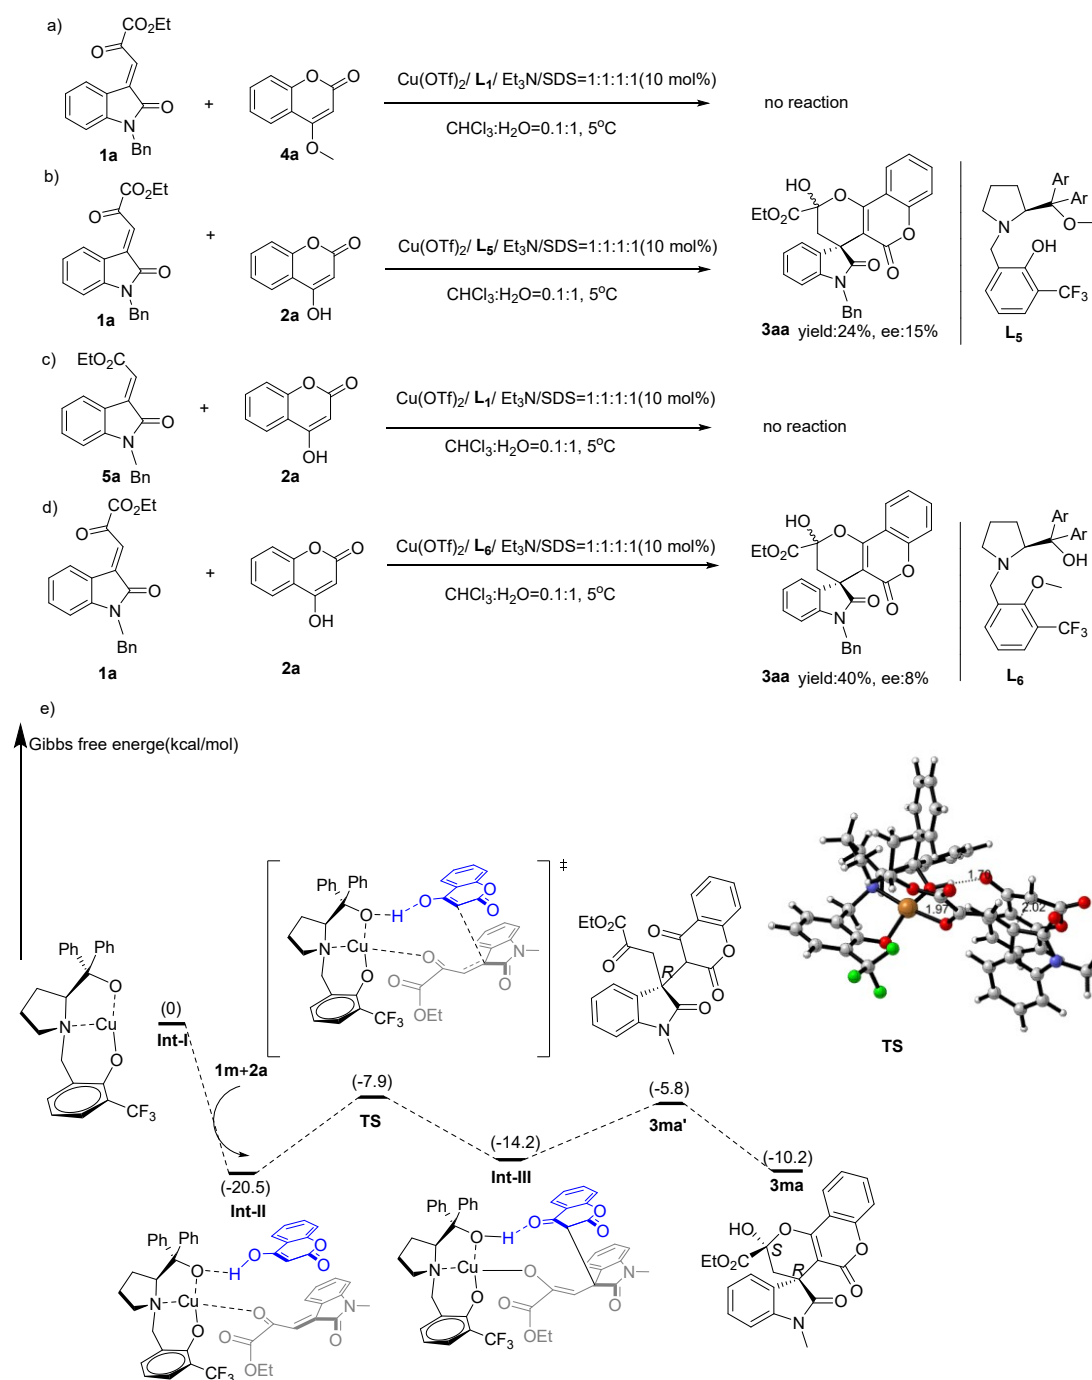

**Scheme S1.** Control experiments; Gibbs free energy profiles for the Cu-catalyzed Michael/hemiketalization of **1m** with **2a**; 3D structures were generated by CYLview,<sup>[4]</sup> key bond distances shown in units of Å.

In order to further understand the reaction mechanism and the coordination with the metal copper in the reaction, several control experiments were carried out. Firstly, when nucleophile 4-hydroxycoumarin was replaced by 4-methoxycoumarin, no desired product was obtained. When the aliphatic hydroxyl group of **L<sub>1</sub>** was replaced by a methoxy group, both the yield and the enantioselectivity were decreased largely, as shown in scheme S1a-b. This indicated that there might be a hydrogen bond

between the aliphatic hydroxyl group in **L<sub>1</sub>** and phenolic hydroxyl of 4-hydroxycoumarin in the reaction. Next, when electrophilic isatin-derived  $\beta,\gamma$ -unsaturated  $\alpha$ -ketoester was replaced by ethyl 2-(1-benzyl-2-oxindolin-3-ylidene)acetate, the reaction couldn't occur. When the phenol hydroxyl group of **L<sub>1</sub>** was replaced by a methoxy group, the corresponding product with low yield and poor enantioselectivity was obtained, as shown in scheme S1c-d. According to our previous report, the copper complex developed in our group generally was a four coordination structure.<sup>[5]</sup> Therefore a plausible reaction mechanism was proposed in Scheme S1e. First, the carbonyl of isatin-derived  $\beta,\gamma$ -unsaturated  $\alpha$ -ketoester coordinates with the copper ions in the catalyst to satisfy the request of square coordination. At the same time, the hydroxyl of 4-hydroxycoumarin binds to the oxygen of the prolinol in the ligand via a hydrogen bond to afford the **Int-II**. Then nucleophilic attack of 4-hydroxycoumarin to the  $\beta,\gamma$ -unsaturated  $\alpha$ -ketoester occurs from *Si* face of the nucleophile acceptor, as shown in **TS**. In contrast, the *Re* attack is hard to occur because of the lack of hydrogen bond. The resulting **Int-III** undergoes a chiral L-Cu complex dissociation to give **3ma'** as the major product and regenerates **Int-I** to restart the catalytic cycle. The product **3ma'** is rapidly converted to hemiketal product **3ma**. The transition state of the reaction was supported by DFT calculation and the solvation effect of water was considered in the calculation. Moreover, we found that the Gibbs free energy of **3ma** was lower than that of **3ma'** which was consistent with the experimental results that **3ma'** was easy to transform to **3ma**.

### DFT calculations

All the calculations were performed using Gaussian 16 software packages.<sup>[6]</sup> The geometry of all reactants and transition states were optimized using the (U)B3LYP<sup>[7]</sup>-D3(Becke-Johnson damping function)<sup>[8]</sup> in water (using the SMD solvation model). In these geometry optimizations, a mixed basis set of SDD<sup>[9]</sup> for Cu, while 6-31G(d)<sup>[10]</sup> for all the other atoms was used. Vibrational frequency analysis was calculated at the same level of theory to validate each structure as either a minimum or a transition state and to evaluate its zero-point energy and thermal corrections at 298 K. For each transition state, the intrinsic reaction coordinate (IRC) analysis was conducted to ensure that it connects the right reactant and product.<sup>[11]</sup>

**Table 3. Thermal correction of Gibbs free energy (TCG, Hartree) and single point energies (EE + Thermal Free Energy Correction, hartree) in solvent for all species involved in this study.**

| Compounds      | TCG (water) | EE + Thermal Free Energy Correction (water) |
|----------------|-------------|---------------------------------------------|
| <b>2a</b>      | 0.097003    | -572.180924                                 |
| <b>1m</b>      | 0.202676    | -896.840443                                 |
| <b>Int-I</b>   | 0.365571    | -1667.817675                                |
| <b>Int-II</b>  | 0.718637    | -3136.871662                                |
| <b>TS</b>      | 0.721863    | -3136.851507                                |
| <b>Int-III</b> | 0.719656    | -3136.861607                                |
| <b>3ma'</b>    | 0.327467    | -1469.057367                                |
| <b>3ma</b>     | 0.331856    | -1469.064398                                |

**2a** (water):

|   |             |             |             |
|---|-------------|-------------|-------------|
| C | 2.89613600  | 0.27055500  | -0.00002600 |
| C | 1.78308700  | 1.09816600  | 0.00002300  |
| C | 0.48341600  | 0.56178300  | 0.00003900  |
| C | 0.33642300  | -0.83922800 | 0.00009100  |
| C | 1.45519600  | -1.67660600 | -0.00003700 |
| C | 2.72753300  | -1.12087800 | -0.00009700 |
| H | 3.89216000  | 0.70087300  | 0.00001900  |
| H | 1.93948400  | 2.17507300  | 0.00010500  |
| H | 1.29752400  | -2.74947500 | -0.00011000 |
| H | 3.59638400  | -1.77190400 | -0.00018700 |
| C | -0.73912800 | 1.34672500  | 0.00000400  |
| O | -0.70085600 | 2.69811600  | 0.00002300  |
| H | 0.21648200  | 3.00950600  | -0.00052400 |
| C | -1.94986800 | 0.73071600  | 0.00004500  |
| H | -2.86594400 | 1.30704000  | -0.00010400 |
| C | -2.08331800 | -0.70749300 | 0.00000000  |
| O | -3.11117300 | -1.34037500 | -0.00017700 |
| O | -0.87959000 | -1.43943500 | 0.00022400  |

**1m (water):**

|   |             |             |             |
|---|-------------|-------------|-------------|
| C | -3.91925500 | 2.29740500  | -0.09758000 |
| C | -4.12526800 | 0.91087200  | -0.10353700 |
| C | -3.00599900 | 0.09514100  | -0.05291200 |
| C | -1.68819400 | 0.62422500  | 0.00346000  |
| C | -1.50967700 | 2.01049500  | 0.00774900  |
| C | -2.63370200 | 2.84014200  | -0.04288100 |
| H | -4.78086300 | 2.95789600  | -0.13671700 |
| H | -5.12602100 | 0.49435800  | -0.14633600 |
| H | -0.50902700 | 2.41751600  | 0.04989100  |
| H | -2.50307500 | 3.91758400  | -0.03978700 |
| C | -0.77903200 | -0.51040800 | 0.04582100  |
| N | -2.96818300 | -1.30179600 | -0.04830500 |
| C | -1.65942100 | -1.75344600 | 0.00969600  |
| O | -1.30599900 | -2.91841300 | 0.02773000  |
| C | 0.56134300  | -0.70101600 | 0.10618200  |
| H | 0.90228500  | -1.73160300 | 0.12159500  |
| C | 1.60308000  | 0.32355100  | 0.15549700  |
| C | 3.03735800  | -0.25050700 | 0.22386500  |
| O | 1.43524700  | 1.53411700  | 0.14208000  |
| O | 3.28231400  | -1.43896500 | 0.17329100  |
| O | 3.94090700  | 0.72372200  | 0.34433700  |
| C | 5.32812700  | 0.30559900  | 0.40176800  |
| H | 5.39676300  | -0.59572100 | 1.01589500  |
| H | 5.83262200  | 1.13219300  | 0.90580300  |
| C | 5.88499700  | 0.07067300  | -0.99263800 |
| H | 5.37550400  | -0.76820400 | -1.47409200 |
| H | 5.76464500  | 0.96462300  | -1.61242100 |
| H | 6.95298200  | -0.16572000 | -0.92894900 |
| C | -4.11759000 | -2.17723600 | -0.09639200 |
| H | -3.74519900 | -3.20248900 | -0.07744700 |

|   |             |             |             |
|---|-------------|-------------|-------------|
| H | -4.77083600 | -2.00992300 | 0.76759400  |
| H | -4.69285200 | -2.01456500 | -1.01498800 |

**Int-I (Water):**

|   |             |             |             |
|---|-------------|-------------|-------------|
| C | 0.18820300  | 0.45661500  | 1.82873500  |
| C | -1.36577500 | -1.02249100 | 0.75845600  |
| C | -1.79416500 | -0.94945500 | 2.23531800  |
| C | -0.88352400 | 0.11895100  | 2.88759400  |
| H | 1.20621800  | 0.45658100  | 2.21923600  |
| H | -0.00154000 | 1.42754800  | 1.37493000  |
| H | -1.37659500 | -2.04618400 | 0.38065200  |
| H | -2.85259900 | -0.71499700 | 2.34756300  |
| H | -1.63026900 | -1.92631300 | 2.70014600  |
| H | -1.44522300 | 1.01860700  | 3.15046700  |
| H | -0.42543600 | -0.26718200 | 3.80232800  |
| N | 0.07305500  | -0.59145900 | 0.77137600  |
| C | 1.00200700  | -1.73757300 | 1.01307000  |
| H | 0.76183900  | -2.21435600 | 1.97092400  |
| H | 0.80165500  | -2.46741100 | 0.22036400  |
| C | 2.45312600  | -1.32452300 | 1.01032700  |
| C | 3.00283700  | -0.56821500 | -0.06340500 |
| C | 3.27526700  | -1.71082800 | 2.07002700  |
| C | 4.38482400  | -0.24763800 | -0.00665800 |
| C | 4.63578400  | -1.39752000 | 2.10567300  |
| H | 2.83346500  | -2.27626900 | 2.88734400  |
| C | 5.18523800  | -0.66213900 | 1.05940100  |
| H | 5.25345600  | -1.71552900 | 2.93945500  |
| H | 6.23777800  | -0.40068700 | 1.06889300  |
| O | 2.29789900  | -0.15535300 | -1.10434500 |
| C | 4.97184700  | 0.55929200  | -1.12094800 |
| F | 4.38262400  | 1.77818800  | -1.25469100 |
| F | 4.86050900  | -0.04729300 | -2.33157200 |
| F | 6.29466600  | 0.79938000  | -0.94050400 |
| C | -2.15341900 | -0.17477700 | -0.30324900 |
| C | -2.44352800 | 1.26214200  | 0.18647200  |
| C | -3.49111800 | 1.53367900  | 1.07918600  |
| C | -1.66717300 | 2.33655100  | -0.26494300 |
| C | -3.72448500 | 2.82908100  | 1.54288700  |
| H | -4.14453500 | 0.73046700  | 1.40376300  |
| C | -1.89766100 | 3.63539500  | 0.19428600  |
| H | -0.87198500 | 2.15333100  | -0.97979000 |
| C | -2.92254400 | 3.88698100  | 1.10778700  |
| H | -4.54021000 | 3.01165200  | 2.23759300  |
| H | -1.27688900 | 4.45104400  | -0.16785900 |
| H | -3.10420600 | 4.89688000  | 1.46548600  |
| C | -3.49320800 | -0.84516300 | -0.65436700 |
| C | -4.24382700 | -0.27103800 | -1.69332500 |
| C | -4.00269800 | -1.98300300 | -0.01964000 |
| C | -5.46114400 | -0.81820600 | -2.08965800 |
| H | -3.86361600 | 0.61676200  | -2.18975000 |

|    |             |             |             |
|----|-------------|-------------|-------------|
| C  | -5.22869900 | -2.53323600 | -0.41259400 |
| H  | -3.46227900 | -2.45997500 | 0.78994400  |
| C  | -5.96200500 | -1.95563300 | -1.44699600 |
| H  | -6.02286300 | -0.35618300 | -2.89741200 |
| H  | -5.60516200 | -3.41601500 | 0.09766000  |
| H  | -6.91401300 | -2.38270500 | -1.75053300 |
| O  | -1.37949000 | -0.15151100 | -1.48362000 |
| Cu | 0.43307500  | -0.09654900 | -1.13955200 |

**Int-II (Water):**

|   |             |             |             |
|---|-------------|-------------|-------------|
| C | -3.83769200 | 1.52421500  | 0.61157600  |
| C | -2.32776900 | 2.70566400  | -0.80888200 |
| C | -3.37214300 | 3.74142300  | -0.35897200 |
| C | -4.25384400 | 3.00912200  | 0.68204100  |
| H | -4.67996500 | 0.83607000  | 0.55898300  |
| H | -3.22778200 | 1.24451700  | 1.46493200  |
| H | -2.09422700 | 2.78010300  | -1.87072300 |
| H | -2.90994600 | 4.64237400  | 0.04432500  |
| H | -3.96618800 | 4.04297400  | -1.22528200 |
| H | -4.08715200 | 3.39513300  | 1.69023400  |
| H | -5.31368400 | 3.13255500  | 0.44615400  |
| N | -3.01004400 | 1.38131200  | -0.62878600 |
| C | -3.88752300 | 1.08653300  | -1.81651700 |
| H | -4.60760500 | 1.89974600  | -1.95266400 |
| H | -3.22725600 | 1.06479200  | -2.68880300 |
| C | -4.61606300 | -0.21697400 | -1.65290700 |
| C | -3.85802400 | -1.40742100 | -1.51260900 |
| C | -6.00777300 | -0.27132100 | -1.60710900 |
| C | -4.55414700 | -2.62585300 | -1.31808700 |
| C | -6.68456600 | -1.48289600 | -1.43424200 |
| H | -6.56990900 | 0.65402600  | -1.70636500 |
| C | -5.95080300 | -2.65740800 | -1.28633700 |
| H | -7.76879200 | -1.50783100 | -1.40563700 |
| H | -6.45963800 | -3.60334200 | -1.13695300 |
| O | -2.53431900 | -1.39505700 | -1.56379500 |
| C | -3.75976600 | -3.87718400 | -1.12771000 |
| F | -2.94453600 | -3.82386900 | -0.03369700 |
| F | -2.94617500 | -4.15468100 | -2.17870600 |
| F | -4.54502500 | -4.96601900 | -0.95400400 |
| C | -0.96206000 | 2.76061200  | -0.05809900 |
| C | -1.08363100 | 2.84588700  | 1.46806700  |
| C | -1.26623200 | 4.08815100  | 2.09220600  |
| C | -1.01195600 | 1.70003300  | 2.26787900  |
| C | -1.40448600 | 4.17724900  | 3.47738500  |
| H | -1.28525500 | 4.99432300  | 1.49700300  |
| C | -1.13543900 | 1.78834600  | 3.65531900  |
| H | -0.87334900 | 0.73003200  | 1.81052700  |
| C | -1.33957800 | 3.02628600  | 4.26600500  |
| H | -1.55019800 | 5.14927700  | 3.93940300  |
| H | -1.07410000 | 0.88488300  | 4.25426300  |

|    |             |             |             |
|----|-------------|-------------|-------------|
| H  | -1.43727800 | 3.09571400  | 5.34538100  |
| C  | -0.07713000 | 3.90364600  | -0.57759700 |
| C  | 1.19615000  | 4.05060200  | -0.00365900 |
| C  | -0.44813500 | 4.77286900  | -1.60902500 |
| C  | 2.08381800  | 5.01811200  | -0.46580200 |
| H  | 1.50049200  | 3.38416000  | 0.79587800  |
| C  | 0.43768300  | 5.75527100  | -2.06440900 |
| H  | -1.42582900 | 4.71127800  | -2.07140600 |
| C  | 1.70649900  | 5.87844700  | -1.50088300 |
| H  | 3.06958100  | 5.09967300  | -0.01747700 |
| H  | 0.12749300  | 6.42157500  | -2.86400000 |
| H  | 2.39476500  | 6.63733400  | -1.86117700 |
| O  | -0.31865100 | 1.51834100  | -0.44360100 |
| Cu | -1.56429000 | -0.04735200 | -0.60658200 |
| C  | 4.46080700  | -1.97664500 | -2.97825900 |
| C  | 5.09935700  | -2.49978100 | -1.84386100 |
| C  | 4.33930400  | -2.65189100 | -0.69873700 |
| C  | 2.96133800  | -2.29959300 | -0.64532000 |
| C  | 2.34839900  | -1.78404200 | -1.79622000 |
| C  | 3.10563100  | -1.63192400 | -2.95859500 |
| H  | 5.03670000  | -1.83597000 | -3.88754300 |
| H  | 6.15086800  | -2.76206600 | -1.86307000 |
| H  | 1.30794000  | -1.49720800 | -1.77521600 |
| H  | 2.64148500  | -1.22067400 | -3.84849200 |
| C  | 2.51313400  | -2.57441300 | 0.70059000  |
| N  | 4.76472200  | -3.14521100 | 0.54134000  |
| C  | 3.73923200  | -3.09228800 | 1.44871600  |
| O  | 3.79662400  | -3.40854900 | 2.63352600  |
| C  | 1.33639600  | -2.52743700 | 1.39104100  |
| H  | 1.35568600  | -2.90395600 | 2.40766200  |
| C  | 0.08643400  | -1.99581800 | 0.93800000  |
| C  | -1.11149700 | -2.23121100 | 1.87378400  |
| O  | -0.07631700 | -1.40680200 | -0.14614600 |
| O  | -1.08585300 | -3.07183600 | 2.75524400  |
| O  | -2.14668900 | -1.46878000 | 1.56027700  |
| C  | -3.42138900 | -1.72219000 | 2.23329900  |
| H  | -3.52963400 | -2.80158000 | 2.34465700  |
| H  | -4.15881500 | -1.35506300 | 1.52033400  |
| C  | -3.49675600 | -0.99634600 | 3.55964000  |
| H  | -2.72237300 | -1.34808400 | 4.24745500  |
| H  | -3.38953800 | 0.08305600  | 3.42573400  |
| H  | -4.47524600 | -1.19401400 | 4.01125300  |
| C  | 6.13852700  | -3.48729900 | 0.86246000  |
| H  | 6.17490700  | -3.78743100 | 1.90940400  |
| H  | 6.47814200  | -4.31547900 | 0.23403900  |
| H  | 6.78865400  | -2.62205500 | 0.70944000  |
| C  | 3.58235800  | 1.97188600  | -2.71742400 |
| C  | 2.91934600  | 1.63008400  | -1.54621900 |
| C  | 3.60828300  | 1.04575600  | -0.46950200 |
| C  | 4.98188300  | 0.79886700  | -0.61930600 |

|   |            |             |             |
|---|------------|-------------|-------------|
| C | 5.65827700 | 1.13021300  | -1.79535000 |
| C | 4.95582600 | 1.71994300  | -2.84100800 |
| H | 3.03525000 | 2.42741500  | -3.53673600 |
| H | 1.85720300 | 1.80964000  | -1.45532800 |
| H | 6.71908400 | 0.91637300  | -1.87139800 |
| H | 5.47851500 | 1.97949400  | -3.75659400 |
| C | 2.95630000 | 0.66916700  | 0.79611300  |
| O | 1.70736400 | 0.86163900  | 0.99687800  |
| H | 0.53239200 | 1.32524700  | 0.08986000  |
| C | 3.77682200 | 0.08363900  | 1.76899200  |
| H | 3.34553400 | -0.21733400 | 2.71634600  |
| C | 5.15847100 | -0.14936600 | 1.59693400  |
| O | 5.94484100 | -0.65421400 | 2.40751800  |
| O | 5.73188400 | 0.21471100  | 0.37108200  |

**TS (Water):**

|   |             |             |             |
|---|-------------|-------------|-------------|
| C | -4.05395700 | 1.05181300  | 0.49127300  |
| C | -2.67972000 | 2.39852400  | -0.91114500 |
| C | -3.90924900 | 3.26320300  | -0.58166200 |
| C | -4.73691700 | 2.43393100  | 0.43083900  |
| H | -4.75043000 | 0.21571600  | 0.44998400  |
| H | -3.45721200 | 0.94970600  | 1.39253700  |
| H | -2.39330500 | 2.46489100  | -1.96055500 |
| H | -3.62941600 | 4.24139000  | -0.19115300 |
| H | -4.47779100 | 3.43421100  | -1.49909000 |
| H | -4.73730200 | 2.89407400  | 1.42170200  |
| H | -5.77511000 | 2.34629300  | 0.10106100  |
| N | -3.13682500 | 0.98535300  | -0.69133600 |
| C | -3.88672800 | 0.50389100  | -1.90777800 |
| H | -4.71402500 | 1.18777800  | -2.12294300 |
| H | -3.17921600 | 0.55005600  | -2.74112000 |
| C | -4.41152200 | -0.89043200 | -1.72225300 |
| C | -3.47638000 | -1.94013600 | -1.52518700 |
| C | -5.77759500 | -1.16293900 | -1.71475800 |
| C | -3.97886800 | -3.24867800 | -1.30952000 |
| C | -6.25968100 | -2.46205400 | -1.52226200 |
| H | -6.47564100 | -0.34188900 | -1.85952800 |
| C | -5.35381400 | -3.49977600 | -1.31599200 |
| H | -7.32656400 | -2.65907100 | -1.52389700 |
| H | -5.71167900 | -4.51008000 | -1.15030300 |
| O | -2.17560500 | -1.70718300 | -1.53513800 |
| C | -3.00569700 | -4.35306700 | -1.05430900 |
| F | -2.23191900 | -4.13386400 | 0.04896700  |
| F | -2.13659000 | -4.54273300 | -2.08088700 |
| F | -3.61766300 | -5.54379100 | -0.84853500 |
| C | -1.39303100 | 2.72438800  | -0.09601900 |
| C | -1.60250600 | 2.83245600  | 1.41894300  |
| C | -2.05129100 | 4.03519500  | 1.98322800  |
| C | -1.34277000 | 1.75119400  | 2.26891100  |
| C | -2.26286700 | 4.14314500  | 3.35756200  |



|    |             |             |             |
|----|-------------|-------------|-------------|
| H  | -2.22009400 | 4.90002800  | 1.35133700  |
| C  | -1.53799000 | 1.86278300  | 3.64664900  |
| H  | -1.00462300 | 0.80877300  | 1.86039400  |
| C  | -2.00552900 | 3.05655000  | 4.19668300  |
| H  | -2.61579300 | 5.08274300  | 3.77228800  |
| H  | -1.32633100 | 1.01030700  | 4.28475300  |
| H  | -2.15970700 | 3.14344300  | 5.26814400  |
| C  | -0.69105200 | 3.98510500  | -0.62152300 |
| C  | 0.50075800  | 4.37841200  | 0.00946600  |
| C  | -1.14281500 | 4.72868200  | -1.71677600 |
| C  | 1.23414300  | 5.46572700  | -0.45713100 |
| H  | 0.86612900  | 3.81511100  | 0.86188700  |
| C  | -0.41465900 | 5.83085500  | -2.17706200 |
| H  | -2.06438300 | 4.47385800  | -2.22560100 |
| C  | 0.77681800  | 6.19992900  | -1.55532900 |
| H  | 2.16048700  | 5.74084700  | 0.03845600  |
| H  | -0.78608900 | 6.39659300  | -3.02643800 |
| H  | 1.34343100  | 7.05212800  | -1.91874200 |
| O  | -0.52984100 | 1.59781400  | -0.40348500 |
| Cu | -1.50208300 | -0.19925300 | -0.47985700 |
| C  | 4.65188900  | -2.02009200 | -2.95587100 |
| C  | 5.29239000  | -2.49813900 | -1.80443300 |
| C  | 4.62164000  | -2.36287700 | -0.59779900 |
| C  | 3.34919000  | -1.76071900 | -0.50071400 |
| C  | 2.72581500  | -1.30119800 | -1.65919500 |
| C  | 3.38336500  | -1.43921600 | -2.88750800 |
| H  | 5.15420700  | -2.10828100 | -3.91442900 |
| H  | 6.27396400  | -2.95598800 | -1.85596300 |
| H  | 1.75628600  | -0.82946600 | -1.59912000 |
| H  | 2.90691600  | -1.07209200 | -3.79077600 |
| C  | 2.99894600  | -1.70024800 | 0.94265400  |
| N  | 5.05834400  | -2.77948000 | 0.67201400  |
| C  | 4.13908600  | -2.46109700 | 1.63410400  |
| O  | 4.22443400  | -2.71409400 | 2.83285500  |
| C  | 1.71560100  | -1.91985200 | 1.55323500  |
| H  | 1.75595900  | -2.32280500 | 2.55828800  |
| C  | 0.46153700  | -1.67005700 | 1.04208100  |
| C  | -0.69295600 | -2.10362400 | 1.94063100  |
| O  | 0.18553500  | -1.15566300 | -0.10908900 |
| O  | -0.58326000 | -2.86939800 | 2.88551600  |
| O  | -1.85297000 | -1.56606400 | 1.55138800  |
| C  | -3.07837700 | -2.02724800 | 2.19654300  |
| H  | -2.98857500 | -3.10307400 | 2.35100400  |
| H  | -3.84842300 | -1.83328700 | 1.45029400  |
| C  | -3.34206900 | -1.28518200 | 3.49019400  |
| H  | -2.54111000 | -1.45716600 | 4.21470900  |
| H  | -3.43805100 | -0.21038600 | 3.31717800  |
| H  | -4.28122400 | -1.65112700 | 3.92016500  |
| C  | 6.38562500  | -3.29505000 | 0.95543000  |
| H  | 6.43923800  | -3.52146700 | 2.02014900  |

|   |            |             |             |
|---|------------|-------------|-------------|
| H | 6.57244800 | -4.20565100 | 0.38004900  |
| H | 7.14063300 | -2.54414200 | 0.70226700  |
| C | 3.23204400 | 2.42251900  | -2.70638100 |
| C | 2.64444500 | 2.09636400  | -1.49281000 |
| C | 3.38708300 | 1.45666400  | -0.48409800 |
| C | 4.74000200 | 1.17390600  | -0.73417600 |
| C | 5.34188600 | 1.49525800  | -1.94659100 |
| C | 4.58089300 | 2.11572200  | -2.93351600 |
| H | 2.64498100 | 2.90723900  | -3.47929700 |
| H | 1.59773800 | 2.30554700  | -1.32319100 |
| H | 6.38759300 | 1.25351200  | -2.09987100 |
| H | 5.04219300 | 2.36179200  | -3.88470000 |
| C | 2.79511000 | 1.01596200  | 0.78107600  |
| O | 1.63959700 | 1.30992400  | 1.15378400  |
| H | 0.28428800 | 1.58345900  | 0.17247600  |
| C | 3.61719400 | 0.11420400  | 1.58493000  |
| H | 3.31219000 | 0.00080700  | 2.61912400  |
| C | 5.07178700 | 0.17897800  | 1.43062400  |
| O | 5.89174800 | -0.14817300 | 2.27285800  |
| O | 5.56205100 | 0.58337800  | 0.20807900  |

**Int-III (Water):**

|   |             |             |             |
|---|-------------|-------------|-------------|
| C | -4.13716000 | 0.22734800  | 0.46524900  |
| C | -3.12900800 | 1.88427500  | -0.90655000 |
| C | -4.53965400 | 2.41333400  | -0.59111400 |
| C | -5.14708400 | 1.39203600  | 0.40182100  |
| H | -4.59963900 | -0.75728500 | 0.41804300  |
| H | -3.54013600 | 0.27670800  | 1.37038100  |
| H | -2.85017900 | 2.03301700  | -1.95010600 |
| H | -4.51850500 | 3.42609800  | -0.18912600 |
| H | -5.12044100 | 2.44722600  | -1.51617300 |
| H | -5.27952800 | 1.82687300  | 1.39535500  |
| H | -6.12409500 | 1.04812300  | 0.05313700  |
| N | -3.22347200 | 0.40006500  | -0.70789500 |
| C | -3.82133100 | -0.23782700 | -1.93430200 |
| H | -4.79094700 | 0.22051300  | -2.15472000 |
| H | -3.14075000 | -0.01135600 | -2.76042400 |
| C | -3.98513100 | -1.71957900 | -1.75676000 |
| C | -2.82014100 | -2.50405300 | -1.55034900 |
| C | -5.24111700 | -2.32183500 | -1.75636300 |
| C | -2.98498600 | -3.89550800 | -1.33044500 |
| C | -5.38806500 | -3.69914700 | -1.56019600 |
| H | -6.11973700 | -1.69951600 | -1.90841100 |
| C | -4.25502600 | -4.47916400 | -1.34204600 |
| H | -6.37301400 | -4.15402500 | -1.56673500 |
| H | -4.35288000 | -5.54569800 | -1.17136400 |
| O | -1.61717800 | -1.95677000 | -1.56039000 |
| C | -1.77202100 | -4.72451900 | -1.05972200 |
| F | -1.09358600 | -4.32237700 | 0.05457000  |
| F | -0.86750700 | -4.69186300 | -2.07234800 |

|    |             |             |             |
|----|-------------|-------------|-------------|
| F  | -2.07304800 | -6.03025600 | -0.86042200 |
| C  | -1.97881000 | 2.51077200  | -0.06173700 |
| C  | -2.23153700 | 2.56209300  | 1.44854100  |
| C  | -2.97416400 | 3.61374300  | 2.00389900  |
| C  | -1.71666700 | 1.58070400  | 2.30382100  |
| C  | -3.22460500 | 3.66274700  | 3.37502300  |
| H  | -3.34585700 | 4.40876100  | 1.36683700  |
| C  | -1.95427100 | 1.63657400  | 3.67839000  |
| H  | -1.14671900 | 0.75342500  | 1.90307300  |
| C  | -2.71515200 | 2.67330400  | 4.21932100  |
| H  | -3.80711800 | 4.48321900  | 3.78359500  |
| H  | -1.54495800 | 0.86289700  | 4.32089300  |
| H  | -2.90227000 | 2.71618100  | 5.28818000  |
| C  | -1.58954800 | 3.90320100  | -0.57913000 |
| C  | -0.50454000 | 4.54801600  | 0.03750500  |
| C  | -2.22245300 | 4.53940800  | -1.65191600 |
| C  | -0.04735100 | 5.77957000  | -0.42336300 |
| H  | -0.00332900 | 4.07560400  | 0.87631500  |
| C  | -1.77352100 | 5.78412400  | -2.10567600 |
| H  | -3.07339600 | 4.08854600  | -2.14763800 |
| C  | -0.68302400 | 6.40528500  | -1.49983200 |
| H  | 0.80227600  | 6.25220600  | 0.06048500  |
| H  | -2.28214200 | 6.26201300  | -2.93773600 |
| H  | -0.33206500 | 7.36838900  | -1.85838700 |
| O  | -0.86506600 | 1.62748500  | -0.34504200 |
| Cu | -1.32967100 | -0.35372700 | -0.48875300 |
| C  | 4.85234700  | -2.28575700 | -2.61221000 |
| C  | 5.45374800  | -2.55070100 | -1.37505000 |
| C  | 4.85980900  | -2.00387600 | -0.24512400 |
| C  | 3.69901800  | -1.21418700 | -0.30449900 |
| C  | 3.11088700  | -0.96939500 | -1.53994200 |
| C  | 3.69676800  | -1.50728100 | -2.69541600 |
| H  | 5.29509500  | -2.69554300 | -3.51507900 |
| H  | 6.35022800  | -3.15674300 | -1.30338100 |
| H  | 2.21261600  | -0.37411800 | -1.61187000 |
| H  | 3.24281900  | -1.31152200 | -3.66187600 |
| C  | 3.36498300  | -0.75608200 | 1.10794100  |
| N  | 5.29257300  | -2.13730600 | 1.08712300  |
| C  | 4.49350100  | -1.43899300 | 1.94087100  |
| O  | 4.61814300  | -1.36777400 | 3.16119800  |
| C  | 2.07506200  | -1.24130900 | 1.70944400  |
| H  | 2.16377400  | -1.62154900 | 2.71917000  |
| C  | 0.84124600  | -1.30143600 | 1.14149000  |
| C  | -0.20739400 | -1.98396800 | 2.00480100  |
| O  | 0.50380600  | -0.87420900 | -0.05197000 |
| O  | 0.03600700  | -2.67635000 | 2.98395600  |
| O  | -1.45260100 | -1.76996900 | 1.55811300  |
| C  | -2.53969400 | -2.51767100 | 2.17692300  |
| H  | -2.19127100 | -3.53810600 | 2.34227900  |
| H  | -3.31530500 | -2.52353000 | 1.41138200  |

|   |             |             |             |
|---|-------------|-------------|-------------|
| C | -3.01629000 | -1.86633100 | 3.45958600  |
| H | -2.22220400 | -1.84496000 | 4.21080600  |
| H | -3.36120900 | -0.84446300 | 3.28185300  |
| H | -3.85461300 | -2.44811700 | 3.85929400  |
| C | 6.47280000  | -2.87957100 | 1.49362700  |
| H | 6.55498400  | -2.81581200 | 2.57849400  |
| H | 6.38249000  | -3.92773900 | 1.19449500  |
| H | 7.36731100  | -2.44939200 | 1.03308900  |
| C | 2.34784700  | 2.95146400  | -2.95753900 |
| C | 1.96528100  | 2.59407000  | -1.67328900 |
| C | 2.90870200  | 2.09953600  | -0.75330000 |
| C | 4.24818000  | 2.01039100  | -1.16423000 |
| C | 4.64693300  | 2.36743800  | -2.44691700 |
| C | 3.68922400  | 2.83029300  | -3.34527400 |
| H | 1.60745400  | 3.32004700  | -3.65945200 |
| H | 0.92851300  | 2.66407100  | -1.37969700 |
| H | 5.69230100  | 2.28130800  | -2.72088100 |
| H | 3.99158400  | 3.10295600  | -4.35128700 |
| C | 2.54001900  | 1.63217700  | 0.58322300  |
| O | 1.44007900  | 1.82464300  | 1.11238000  |
| H | -0.08365300 | 1.81109800  | 0.23373500  |
| C | 3.58564000  | 0.83028600  | 1.32380400  |
| H | 3.47186500  | 0.99174400  | 2.39684500  |
| C | 5.00747200  | 1.18224800  | 0.95896200  |
| O | 5.95114500  | 1.04995900  | 1.70702000  |
| O | 5.26545900  | 1.60801000  | -0.31302400 |

**3ma' (Water):**

|   |             |             |             |
|---|-------------|-------------|-------------|
| C | -4.78352400 | -2.22400800 | 0.57739300  |
| C | -4.84124600 | -1.06155000 | -0.20117100 |
| C | -3.65264500 | -0.37762300 | -0.41690900 |
| C | -2.42458300 | -0.80273600 | 0.11628200  |
| C | -2.38458300 | -1.96283200 | 0.87951200  |
| C | -3.57238600 | -2.67333000 | 1.10517200  |
| H | -5.69565200 | -2.78310100 | 0.76340200  |
| H | -5.77665200 | -0.71450000 | -0.62607400 |
| H | -1.44962100 | -2.31896100 | 1.28909700  |
| H | -3.54447700 | -3.58218300 | 1.69803200  |
| C | -1.35604800 | 0.19925900  | -0.29298100 |
| N | -3.47154300 | 0.77716200  | -1.19851800 |
| C | -2.15382100 | 1.11851400  | -1.27280200 |
| O | -1.67146800 | 1.97636700  | -2.00631800 |
| C | -0.17193400 | -0.33741900 | -1.11700600 |
| H | -0.57828300 | -0.94285700 | -1.94177500 |
| C | 0.84384600  | -1.21836000 | -0.45010300 |
| C | 2.19413000  | -1.30974300 | -1.19676600 |
| O | 0.67601200  | -1.85767400 | 0.57034000  |
| O | 2.51472800  | -0.52996400 | -2.07574500 |
| O | 2.90938500  | -2.33648800 | -0.75704300 |
| C | 4.19198100  | -2.58961100 | -1.41476000 |

|   |             |             |             |
|---|-------------|-------------|-------------|
| H | 4.05571000  | -2.44779600 | -2.48887200 |
| H | 4.37853500  | -3.64371800 | -1.20803500 |
| C | 5.28567400  | -1.70292900 | -0.85597400 |
| H | 5.11035300  | -0.65310900 | -1.10189200 |
| H | 5.35368300  | -1.80803800 | 0.23120400  |
| H | 6.24299800  | -2.00648000 | -1.29369400 |
| C | -4.51971700 | 1.40135100  | -1.98730600 |
| H | -4.09016800 | 2.25983200  | -2.50284600 |
| H | -4.91692000 | 0.69400400  | -2.72191300 |
| H | -5.33101400 | 1.73560900  | -1.33517300 |
| C | 3.72311200  | 2.17756900  | -0.05959700 |
| C | 2.39018400  | 2.55612900  | -0.15494500 |
| C | 1.41724400  | 1.90899500  | 0.62038000  |
| C | 1.81360700  | 0.89260100  | 1.49763200  |
| C | 3.14533200  | 0.51208100  | 1.61567100  |
| C | 4.09613000  | 1.16118400  | 0.82970000  |
| H | 4.47391600  | 2.66739500  | -0.67021700 |
| H | 2.07344500  | 3.33857900  | -0.83641100 |
| H | 3.41912000  | -0.27332500 | 2.31074200  |
| H | 5.13718900  | 0.86812600  | 0.91028200  |
| C | -0.00712900 | 2.25180600  | 0.53414000  |
| O | -0.42160200 | 3.33783300  | 0.15137600  |
| C | -0.95967000 | 1.13253600  | 0.94383600  |
| C | -0.44319700 | 0.35883100  | 2.14580900  |
| O | -1.16489600 | -0.14765700 | 2.97283900  |
| O | 0.90807100  | 0.26053700  | 2.34047900  |
| H | 0.34502800  | 0.49231800  | -1.60343400 |
| H | -1.89275600 | 1.59014500  | 1.27852900  |

**3ma (Water):**

|   |             |             |             |
|---|-------------|-------------|-------------|
| C | -4.05008600 | 0.42526400  | -2.35546300 |
| C | -4.30751000 | -0.30151700 | -1.18498100 |
| C | -3.25544300 | -0.47269300 | -0.29525700 |
| C | -1.98459700 | 0.07920200  | -0.51617400 |
| C | -1.72939900 | 0.74386000  | -1.70497700 |
| C | -2.77501100 | 0.92643100  | -2.62309400 |
| H | -4.85174600 | 0.57581000  | -3.07238300 |
| H | -5.28388500 | -0.73376300 | -0.99425900 |
| H | -0.73383300 | 1.10101500  | -1.93075100 |
| H | -2.58416900 | 1.45421200  | -3.55248300 |
| C | -1.08324700 | -0.30596800 | 0.65043500  |
| N | -3.24858300 | -1.24586800 | 0.88022200  |
| C | -1.98926200 | -1.33281600 | 1.40075900  |
| O | -1.64590200 | -2.02847500 | 2.35262800  |
| C | -0.83704300 | 0.79903000  | 1.71865100  |
| H | -1.65629700 | 1.52126600  | 1.71291700  |
| C | 0.48556800  | 1.56308500  | 1.69367100  |
| C | 0.56707400  | 2.82155400  | 0.80578800  |
| O | 0.76669200  | 1.94425100  | 2.99804800  |
| O | 1.02222500  | 3.86684700  | 1.24065500  |

|   |             |             |             |
|---|-------------|-------------|-------------|
| O | 0.14805100  | 2.60454700  | -0.42249300 |
| C | 0.27579700  | 3.69377000  | -1.39353500 |
| H | 0.05075300  | 4.63213600  | -0.88490400 |
| H | -0.50372200 | 3.47908600  | -2.12454900 |
| C | 1.65912600  | 3.68085600  | -2.00842300 |
| H | 2.42656800  | 3.87689500  | -1.25353900 |
| H | 1.86407300  | 2.71489600  | -2.48078700 |
| H | 1.71925100  | 4.46156700  | -2.77423200 |
| C | -4.36521200 | -2.06401300 | 1.31839400  |
| H | -5.24313300 | -1.43671500 | 1.49360600  |
| H | -4.60779100 | -2.81864500 | 0.56301700  |
| H | -4.08004300 | -2.55796200 | 2.24715800  |
| C | 5.06464000  | -1.07408700 | -0.19838900 |
| C | 3.93670400  | -0.43385100 | 0.29318200  |
| C | 2.65985100  | -0.97191000 | 0.05148300  |
| C | 2.55553600  | -2.15599300 | -0.69169200 |
| C | 3.68264200  | -2.80659200 | -1.18917400 |
| C | 4.93605600  | -2.25967500 | -0.93818000 |
| H | 6.04811900  | -0.65598700 | -0.01103600 |
| H | 4.02287900  | 0.48364900  | 0.86314900  |
| H | 3.55998700  | -3.72094000 | -1.75912200 |
| H | 5.82083300  | -2.75783900 | -1.32155500 |
| C | 1.43202700  | -0.36497100 | 0.51608800  |
| O | 1.61186900  | 0.75482700  | 1.23795000  |
| C | 0.21913400  | -0.92412000 | 0.22844400  |
| C | 0.15193800  | -2.15287500 | -0.52206700 |
| O | -0.87992200 | -2.75087300 | -0.80406500 |
| O | 1.33270700  | -2.72393700 | -0.95944400 |
| H | -0.83317500 | 0.30655200  | 2.69444100  |
| H | 1.26394500  | 2.78652500  | 2.94460800  |

## References:

- [1] a) Guo, F. F.; Lai, G.; Xiong, S.; Wang, S.; Wang, Z. *Chem. -Eur. J.*, 2010, **16**, 6438. b) Zhang, S.; Xu, K.; Guo, F. F.; Hu, Y.; Zha, Z. Z.; Wang, Z. Y. *Chem. -Eur. J.*, 2014, **20**, 979.
- [2] a) Gajulapalli, V. P. R.; Lokesh, K.; Vishwanath, M.; Kesavan, V. *RSC Adv.*, 2016, **6**, 12180. b) Muthusamy, S.; Prakash, M.; Ramakrishnan, C.; Gromiha, M.; Kesavan, V. *ChemCatChem.*, 2016, **8**, 1708. c) Li, K. N.; Kong, P. L.; Qi, Z. H.; Yin, S. J.; Zhang, J. Q.; Wu, B.; Wang, X. W. *Advanced Synthesis & Catalysis*, 2016, **358**, 3100. d) Li, K. N.; Zhang, J. Q.; Sun, B. B.; Li, H. Y and Wang, X. W. *Org. Lett.*, 2017, **19**, 1954.
- [3] a) Chen, X-K.; Zheng, C-W.; Zhao, S-L.; Chai, Z.; Yang, Y-Q.; Zhao, G.; Cao, W-G. *Adv. Synth. Catal.*, 2010, **352**, 1648–1652. b) Tukhvatshin, R. S.; Kucherenko, A. S.; Nelyubina, Y.V.; Zlotin, S. G. *J. Org. Chem.*, 2019, **84**, 13824–13831.
- [4] Legault, C. Y. CYLview, 1.0b; Université de Sherbrooke, 2009; <http://www.cylview.org>.
- [5] Li, K. L.; Sun, X.; Li, L. G.; Zha, Z. G.; Zhang, F-L.; Wang, Z. Y. *Chem. Eur. J.*, 2021, **27**, 581 – 584.
- [6] Frisch, M. J.; Trucks, G. W.; Schlegel, H. B.; Scuseria, G. E.; Robb, M. A.; Cheeseman, J. R.; Scalmani, G.; Barone, V.; Petersson, G. A.; Nakatsuji, H.; Li, X.; Caricato, M.; Marenich, A. V.; Bloino, J.; Janesko, B. G.; Gomperts, R.; Mennucci, B.; Hratchian, H. P.; Ortiz, J. V.; Izmaylov, A. F.; Sonnenberg, J. L.; Williams-Young, D.; Ding, F.; Lipparini, F.; Egidi, F.; Goings, J.; Peng, B.; Petrone, A.; Henderson, T.; Ranasinghe, D.; Zakrzewski, V. G.; Gao, J.; Rega, N.; Zheng, G.; Liang, W.; Hada, M.; Ehara, M.; Toyota, K.; Fukuda, R.; Hasegawa, J.; Ishida, M.; Nakajima, T.; Honda, Y.; Kitao, O.; Nakai, H.; Vreven, T.; Throssell, K.; Jr. Montgomery, J. A.; Peralta, J. E.; Ogliaro, F.; Bearpark, M. J.; Heyd, J. J.; Brothers, E. N.; Kudin, K. N.; Staroverov, V. N.; Keith, T. A.; Kobayashi, R.; Normand, J.; Raghavachari, K.; Rendell, A. P.; Burant, J. C.; Iyengar, S. S.; Tomasi, J.; Cossi, M.; Millam, J. M.; Klene, M.; Adamo, C.; Cammi, R.; Ochterski, J. W.; Martin, R. L.; Morokuma, K.; Farkas, O.; Foresman, J. B.; Fox, D. J. Gaussian 16, Revision C.01, Gaussian, Inc., Wallingford CT, 2016.
- [7] (a) Becke, A. D. *J. Chem. Phys.* 1993, **98**, 5648. (b) Lee, C. T.; Yang, W. T.; Parr, R. G. *Phys. Rev. B* 1988, **37**, 785.
- [8] (a) Grimme, S.; Antony, J.; Ehrlich, S.; Krieg, H. *J. Chem. Phys.* 2010, **132**, 154104; (b) S87 Grimme, S.; Ehrlich, S.; Goerigk, L. *J. Comput. Chem.* 2011, **32**, 1456.
- [9] Marenich, A. V.; Cramer, C. J.; Truhlar, D. G. *J. Phys. Chem. B* 2009, **113**, 6378.
- [10] Andrae, D.; Häußermann, U.; Dolg, M.; Stoll, H.; Preuß, H. *Theor. Chim. Acta* 1990, **77**, 123.
- [11] Hehre, W. J.; Radom, L.; Schleyer, P. v. R.; Pople, J. A, *Ab Initio Molecular Orbital Theory*; Wiley: New York, 1986.

## Part II <sup>1</sup>H NMR & <sup>19</sup>F NMR & <sup>13</sup>C NMR

### <sup>1</sup>H NMR of **3aa**

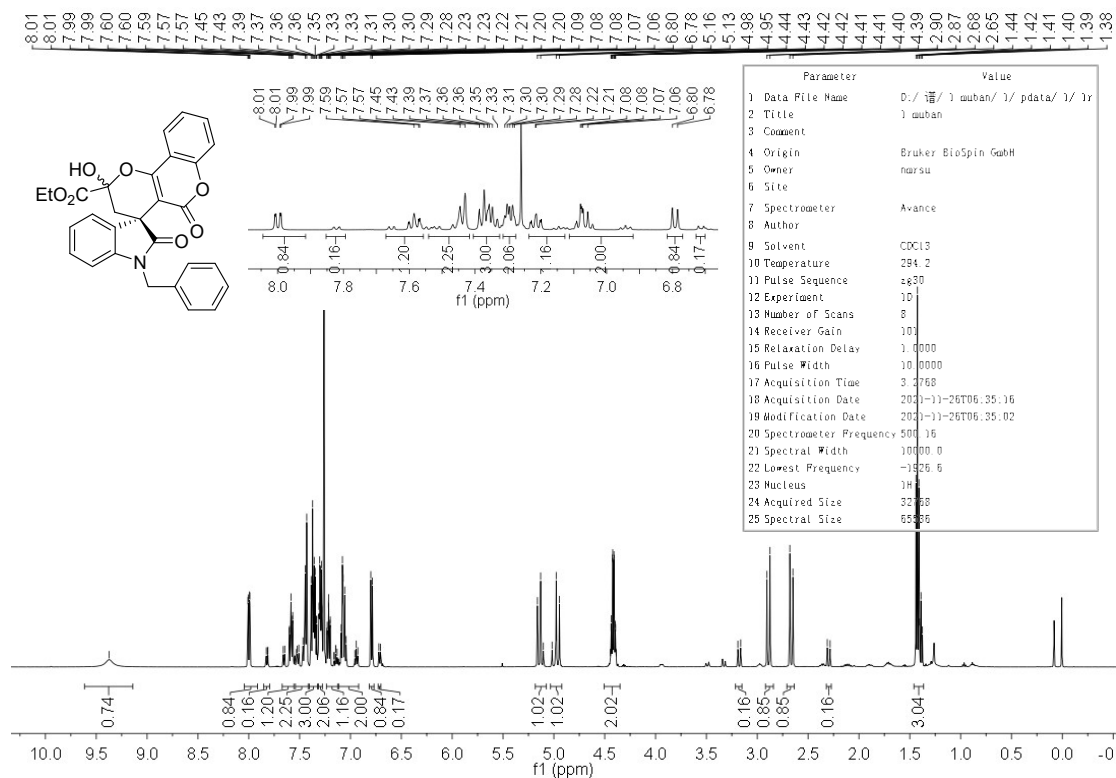

### <sup>13</sup>C NMR of **3aa**

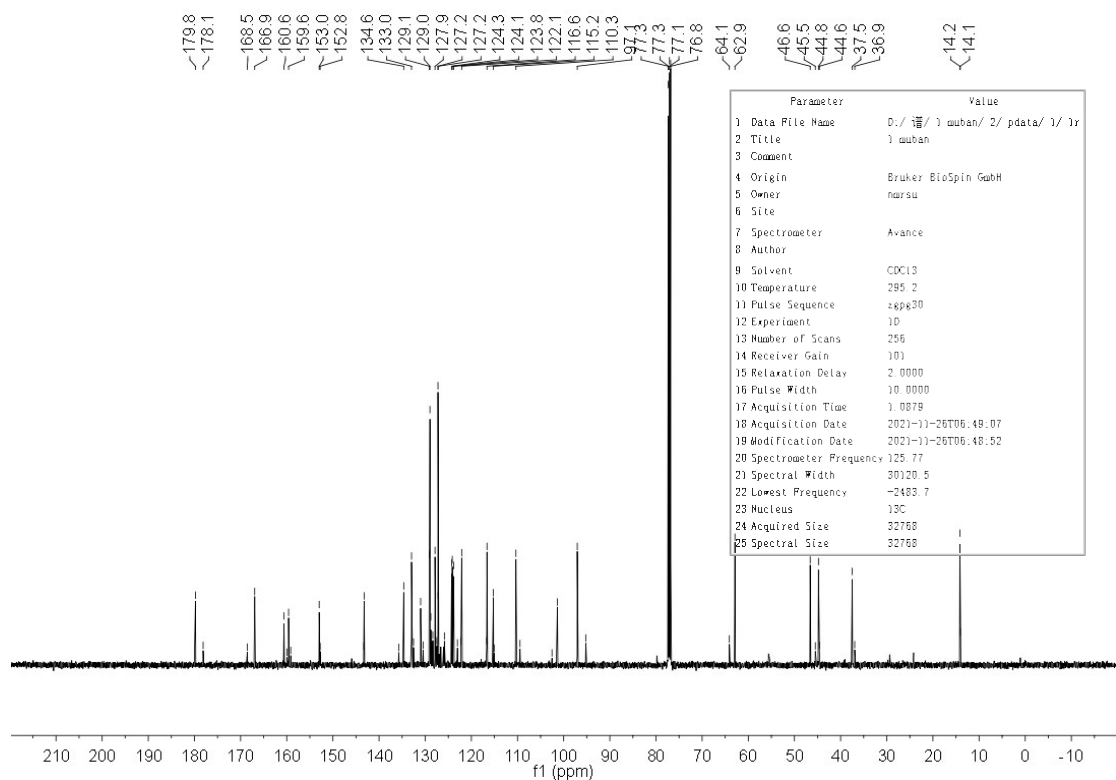



### <sup>1</sup>H NMR of 3ba

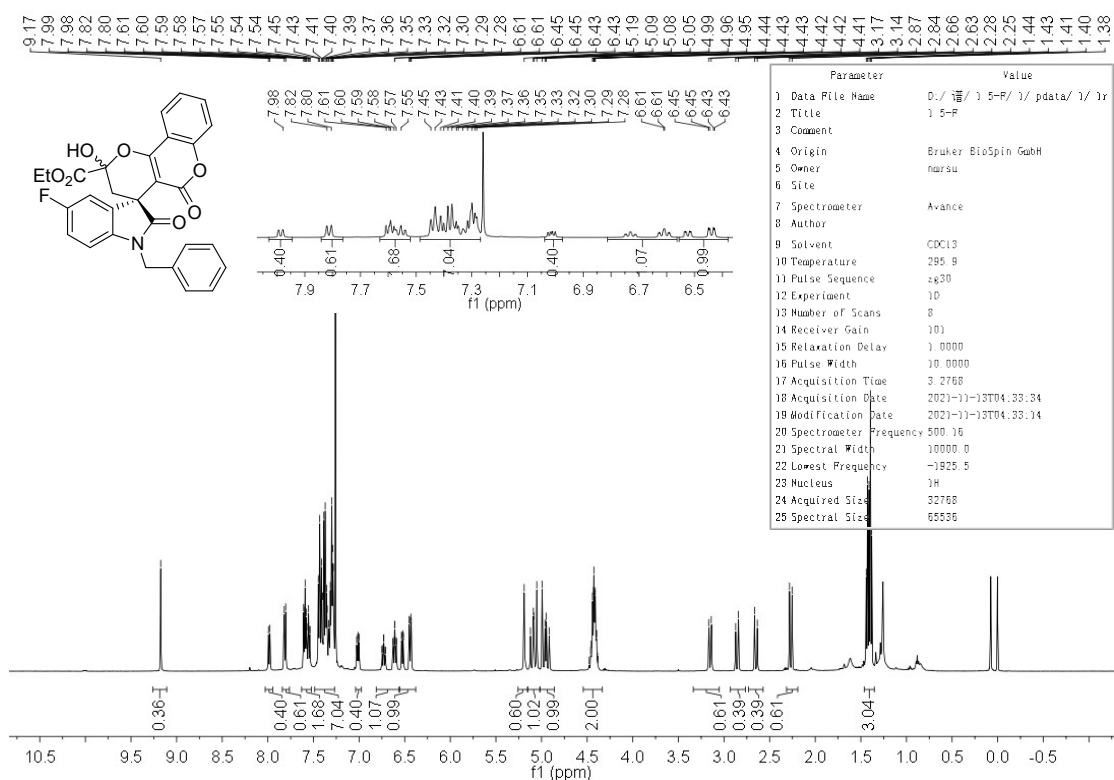

### <sup>13</sup>C NMR of 3ba

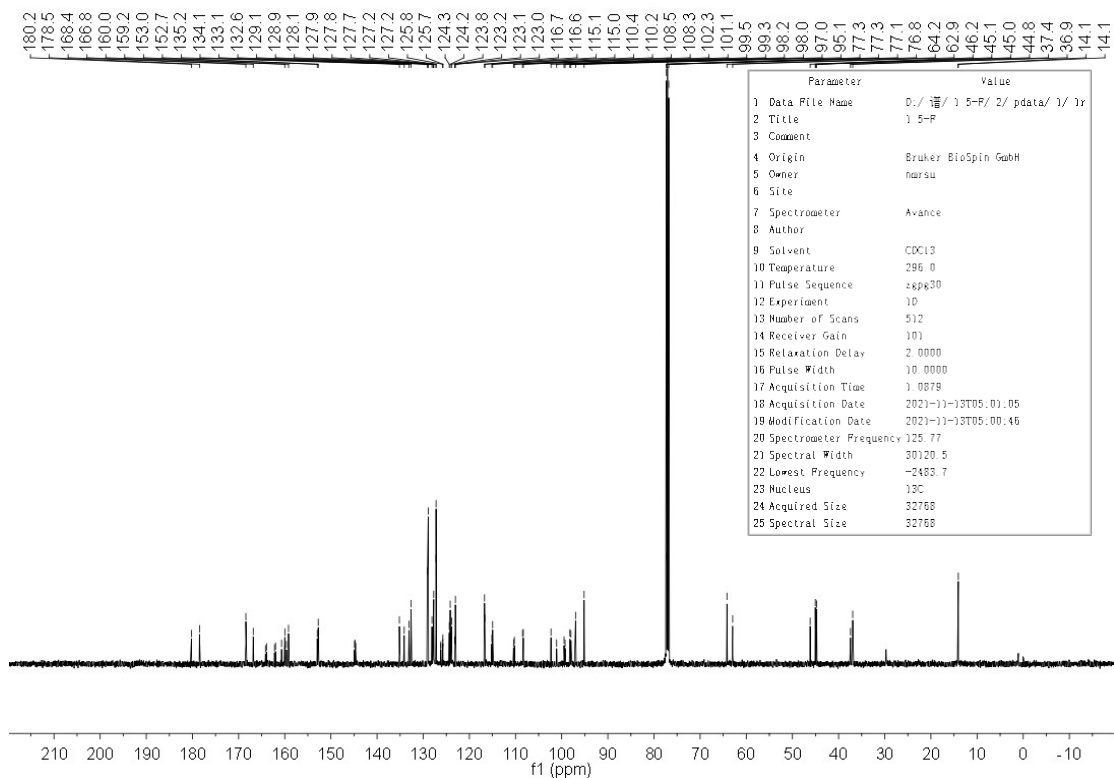

### <sup>19</sup>F NMR of 3ba

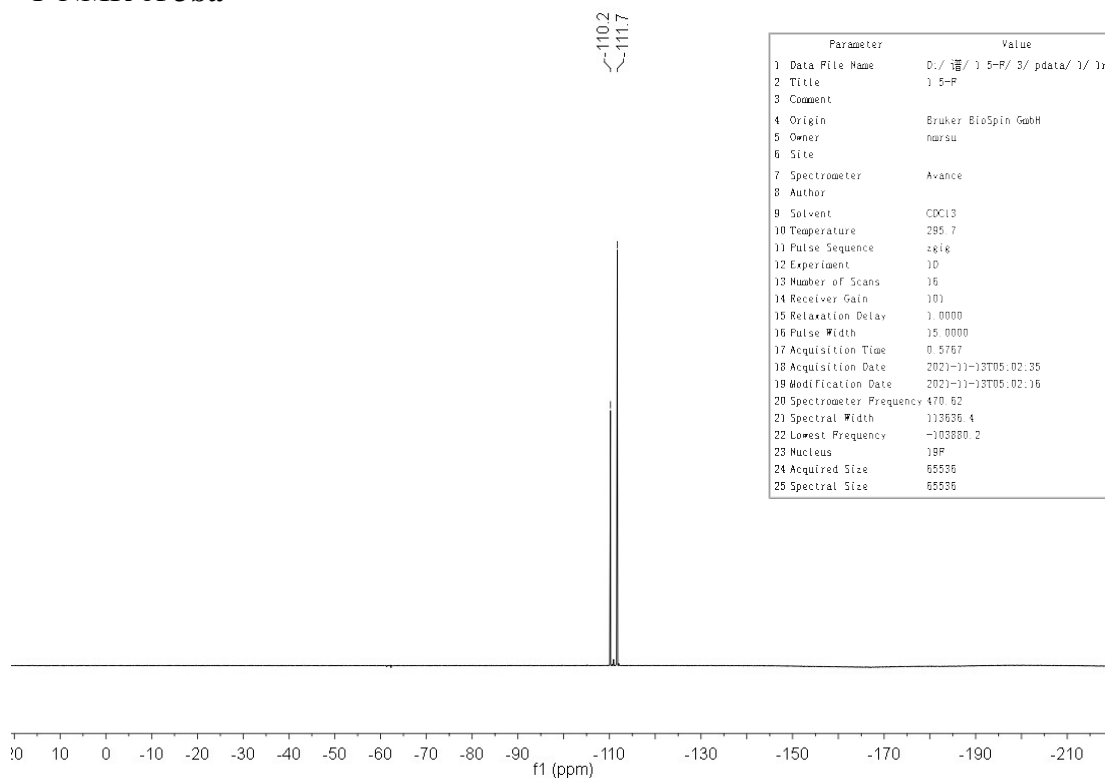

### <sup>1</sup>H NMR of 3ca

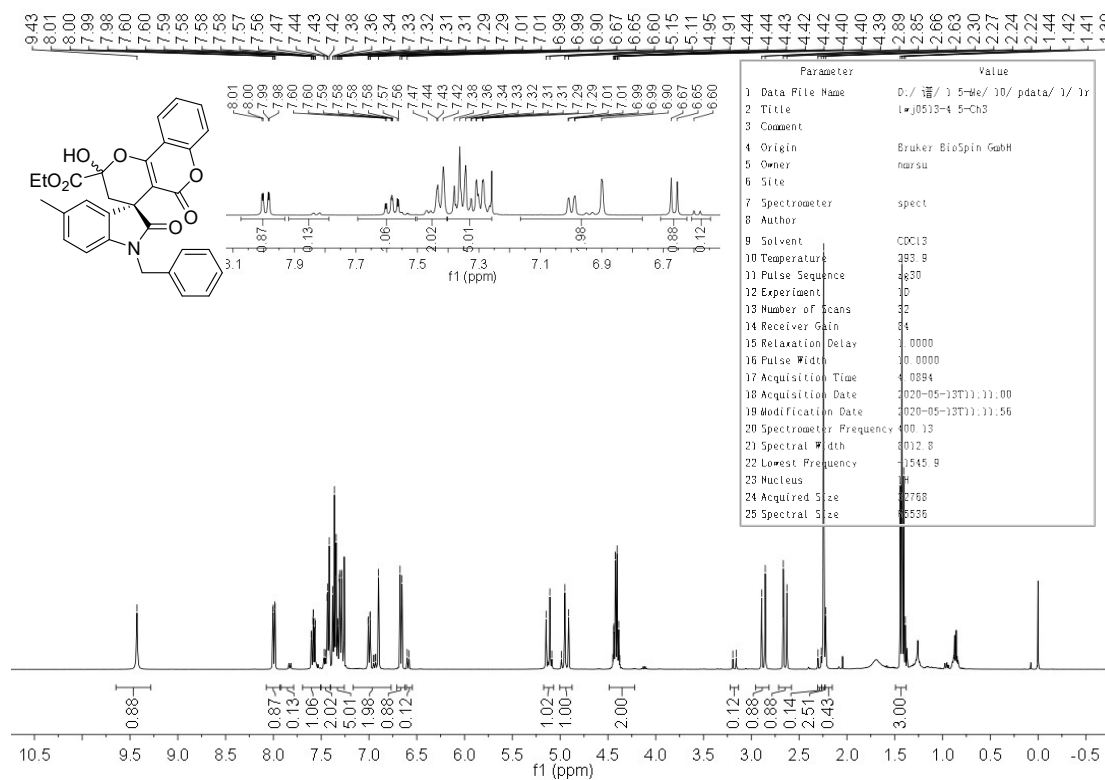

### <sup>13</sup>C NMR of 3ca

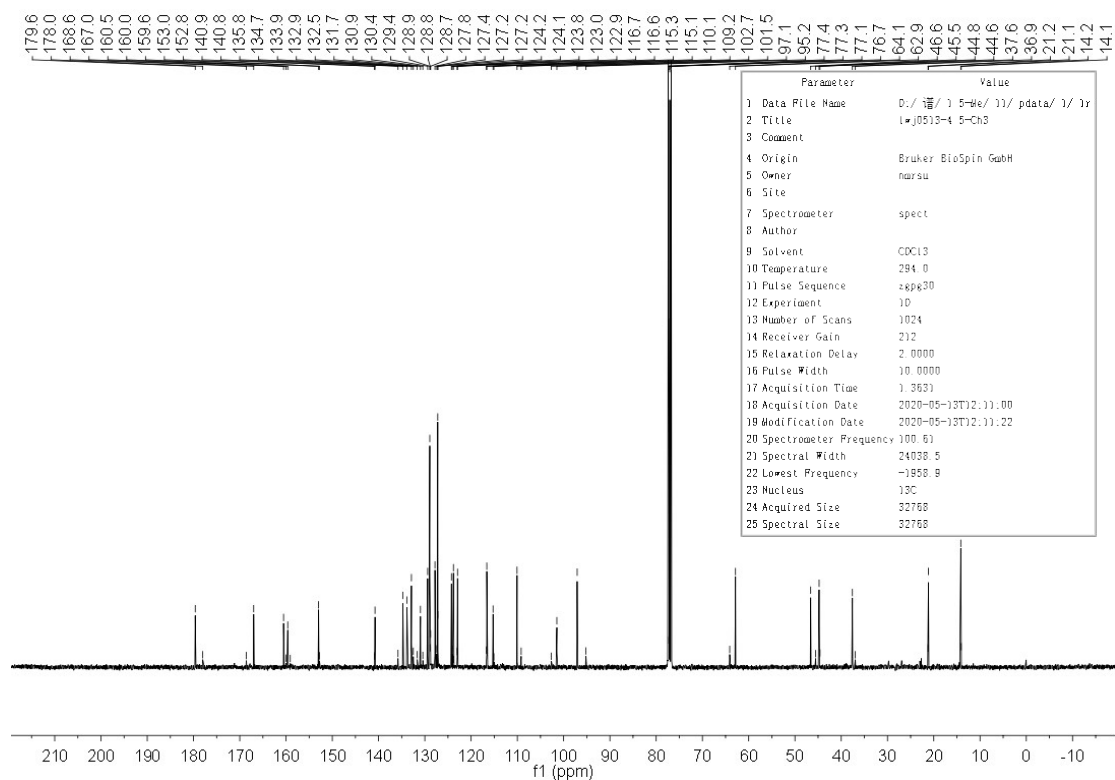

### <sup>1</sup>H NMR of 3da

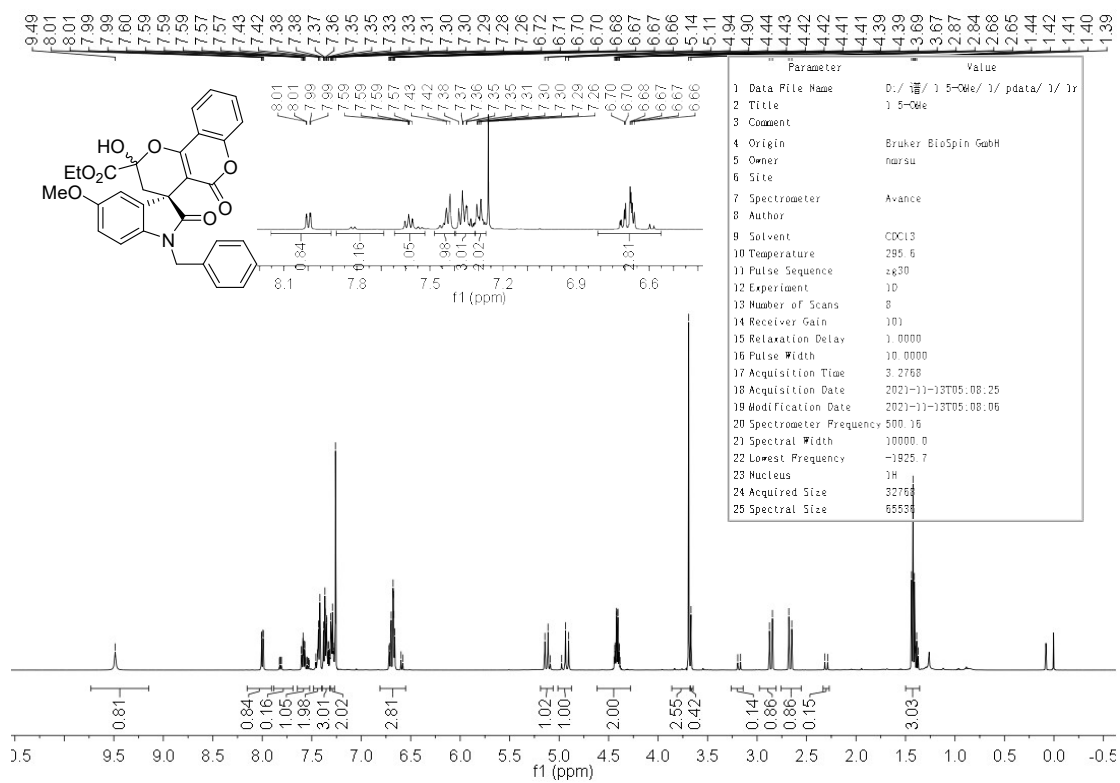

### <sup>13</sup>C NMR of 3da

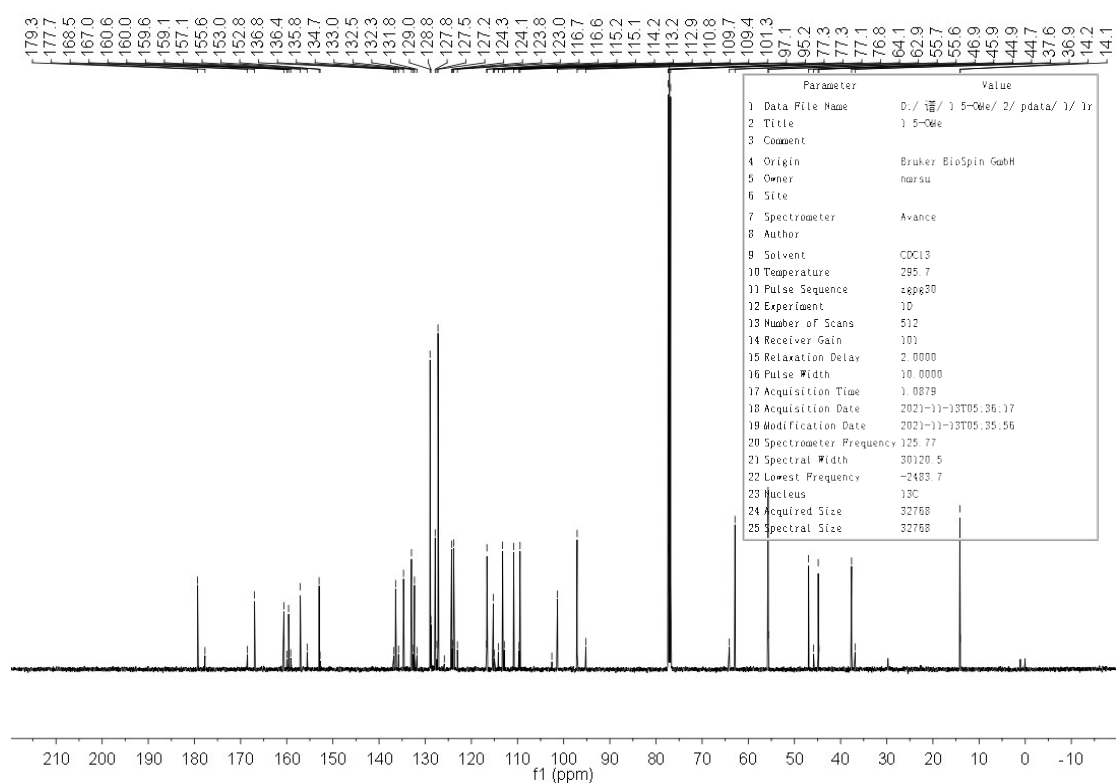

### <sup>1</sup>H NMR of 3ea

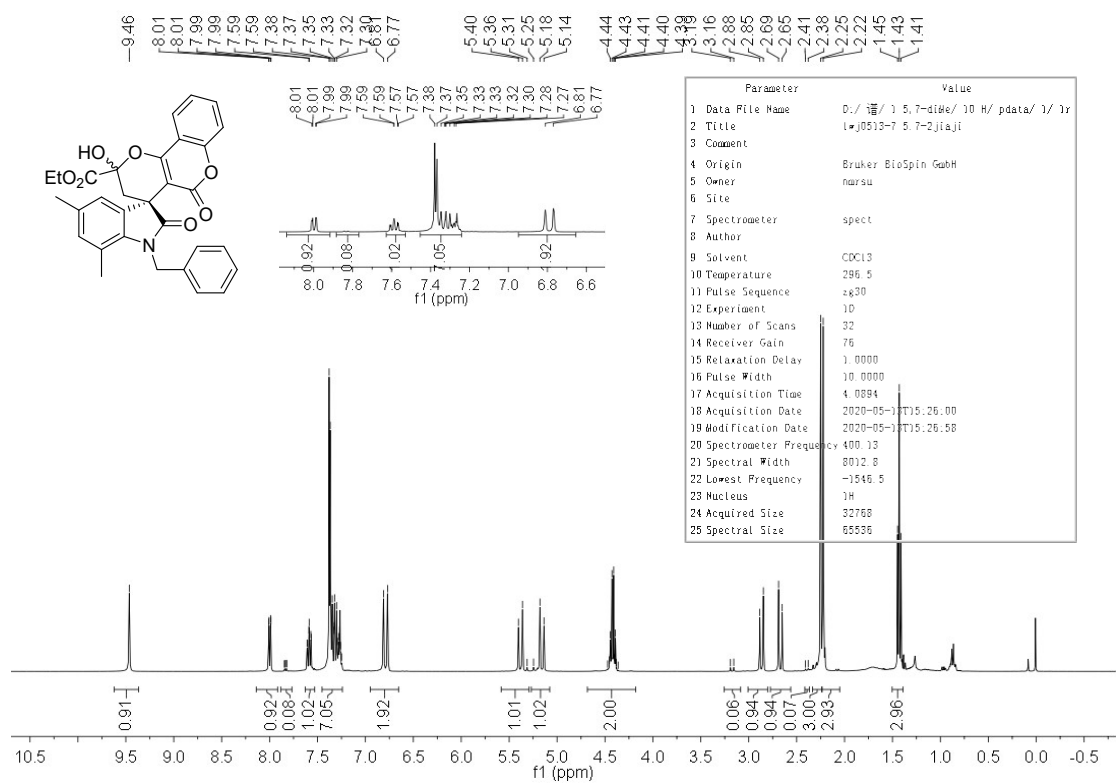

### <sup>13</sup>C NMR of 3ea

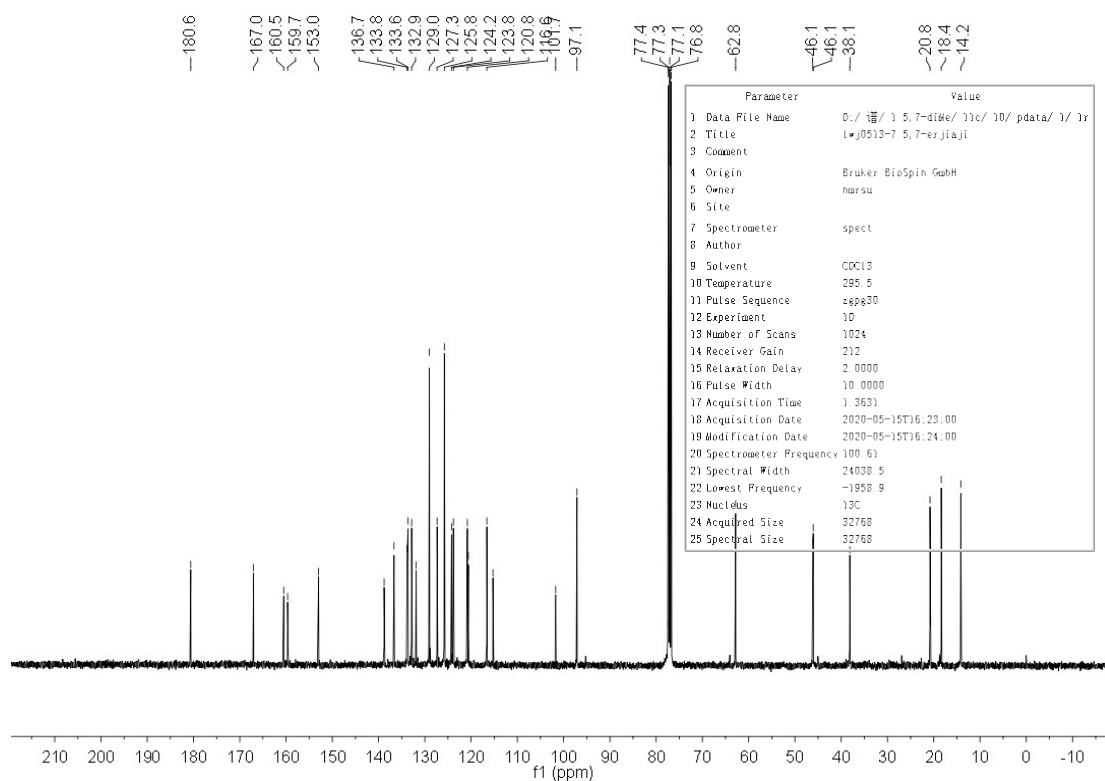

### <sup>1</sup>H NMR of 3fa

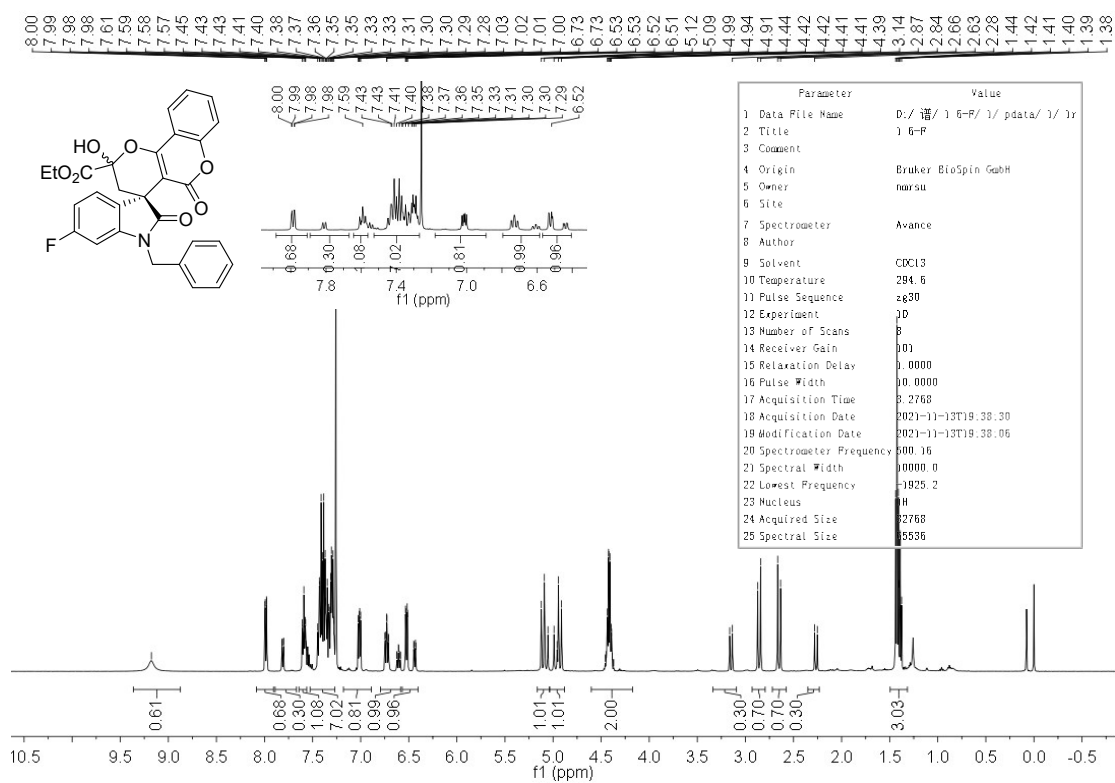

### <sup>13</sup>C NMR of 3fa

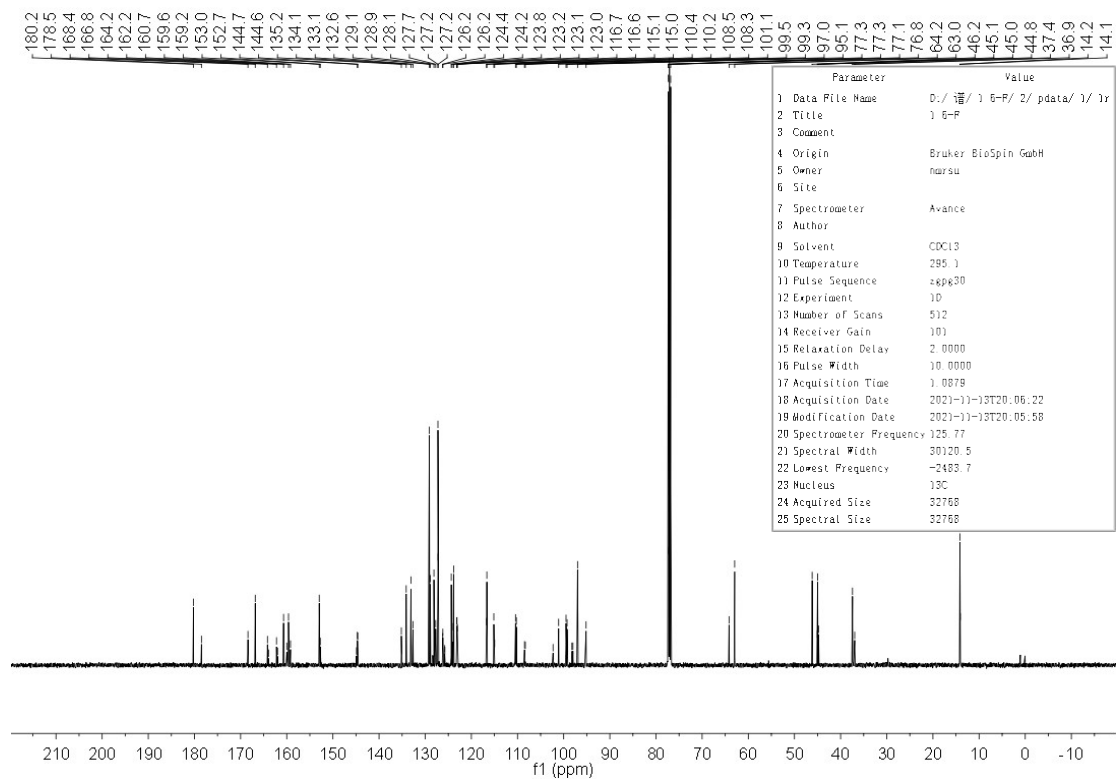

### <sup>19</sup>F NMR of 3fa

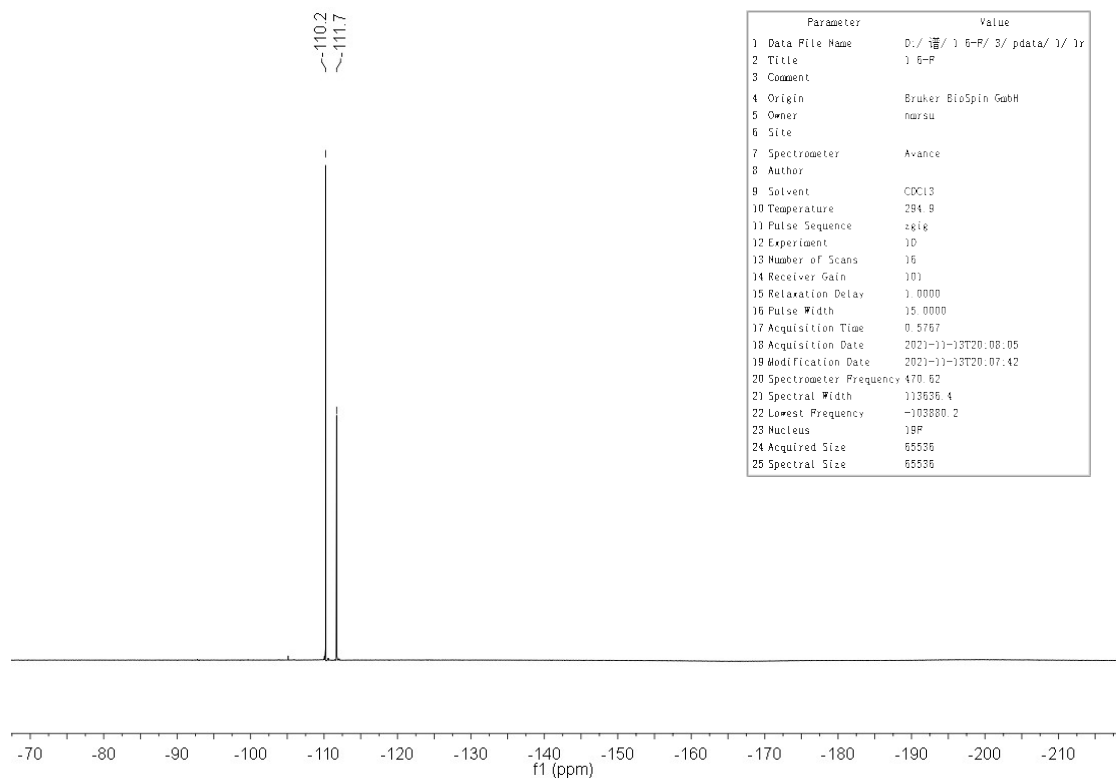

### <sup>1</sup>H NMR of 3ga

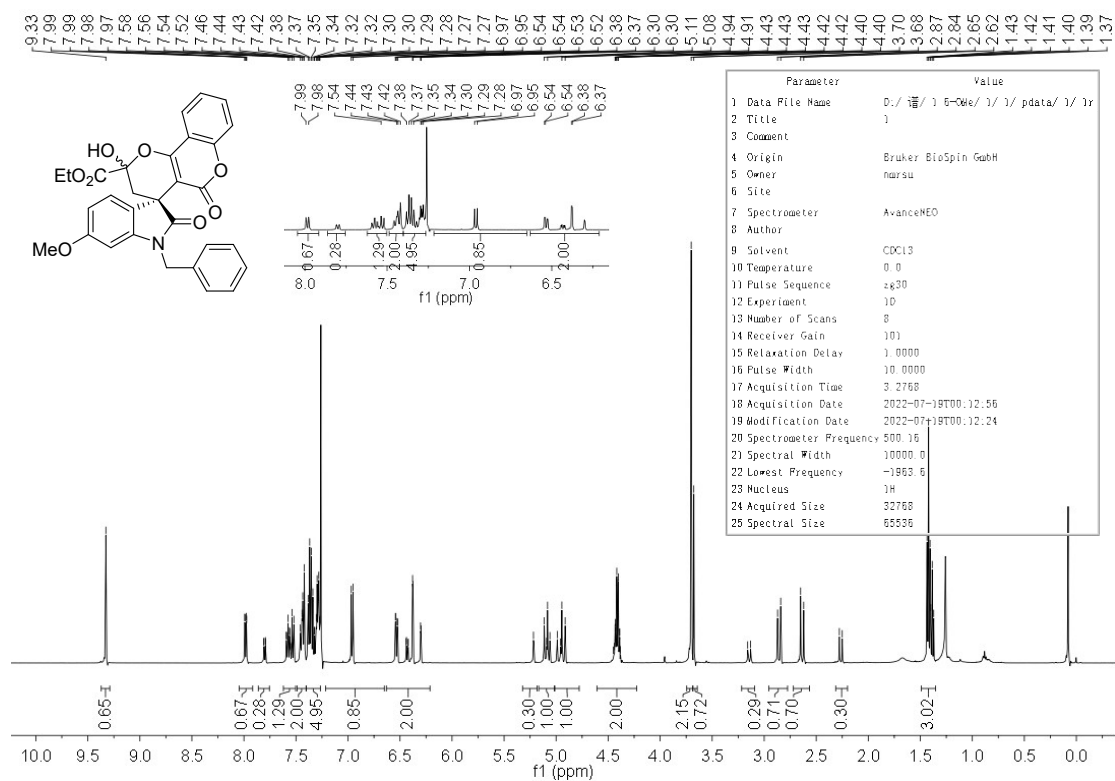

### <sup>13</sup>C NMR of 3ga

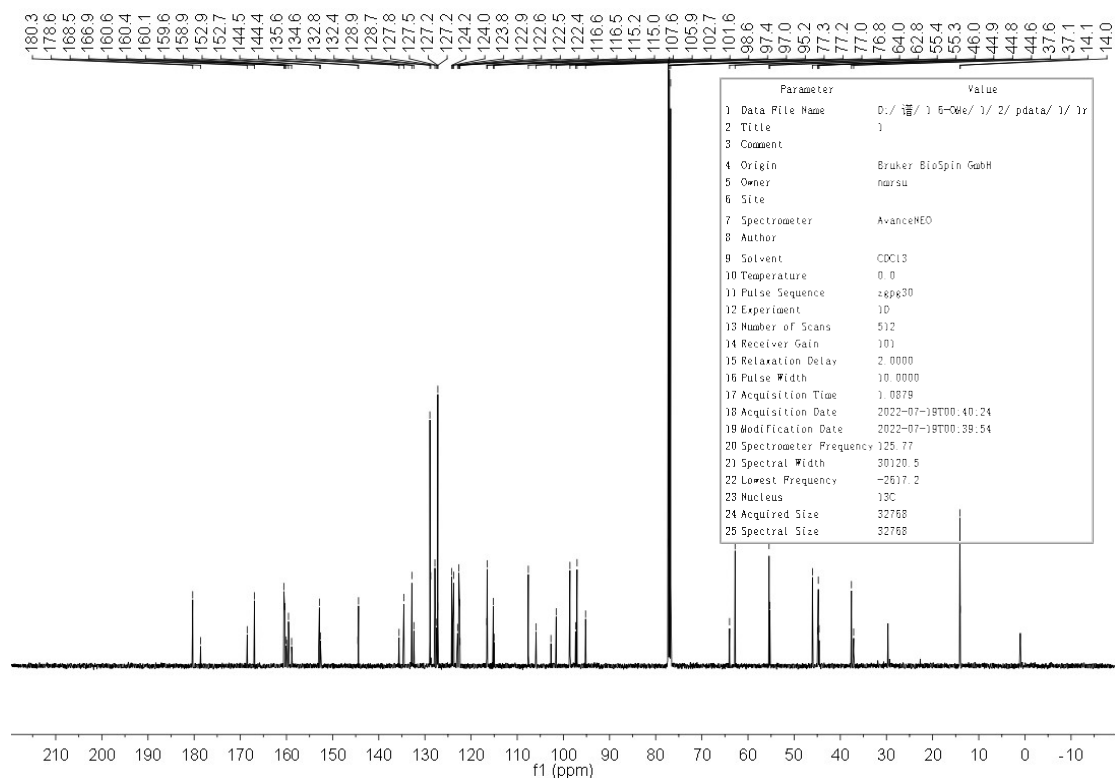

### <sup>1</sup>H NMR of 3ha

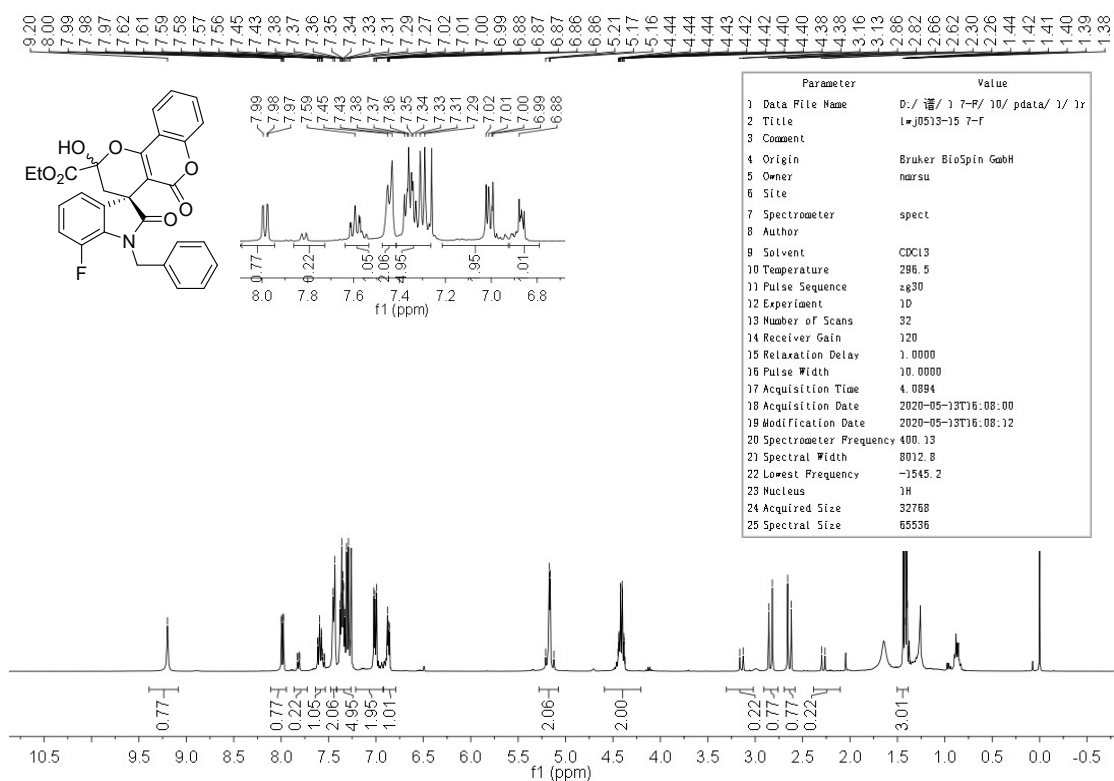

### <sup>13</sup>C NMR of 3ha

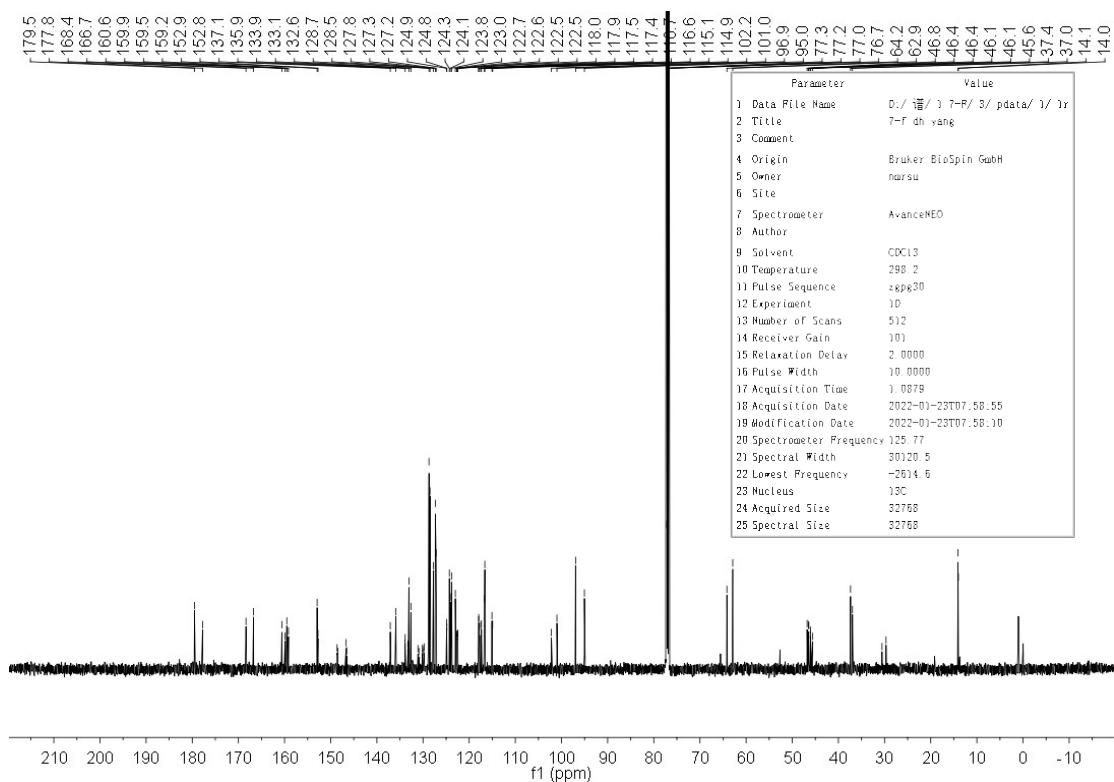



### <sup>19</sup>F NMR of 3ha

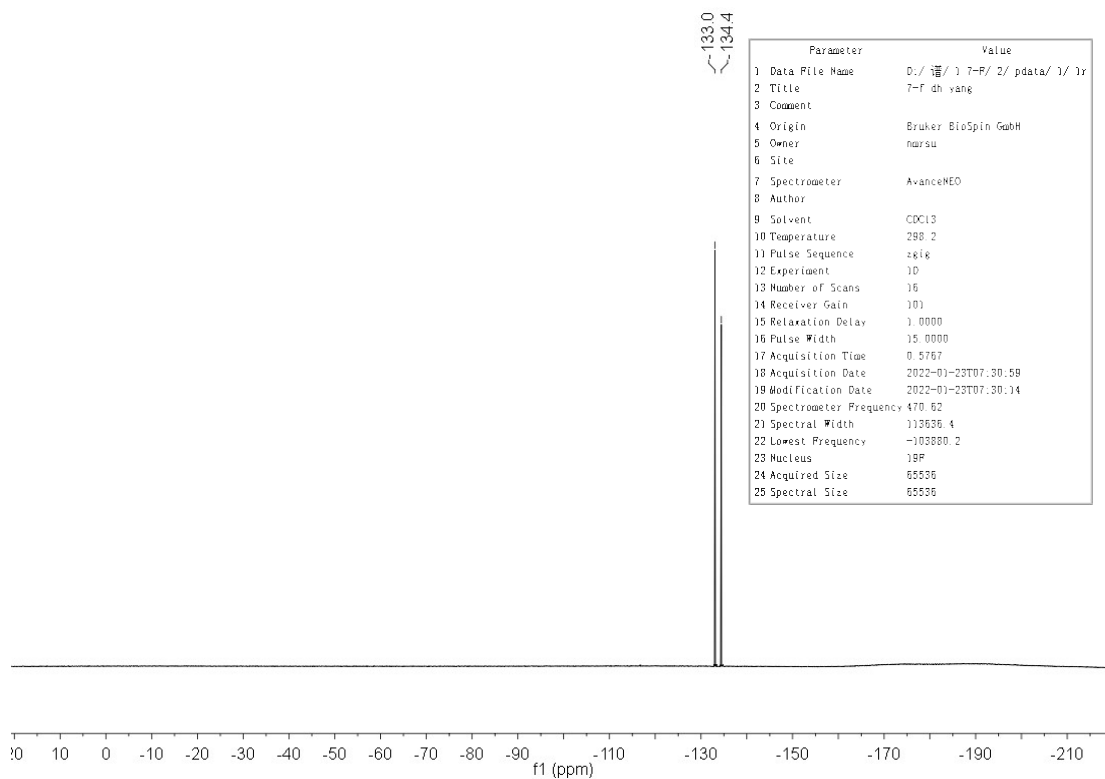

### <sup>1</sup>H NMR of 3ia

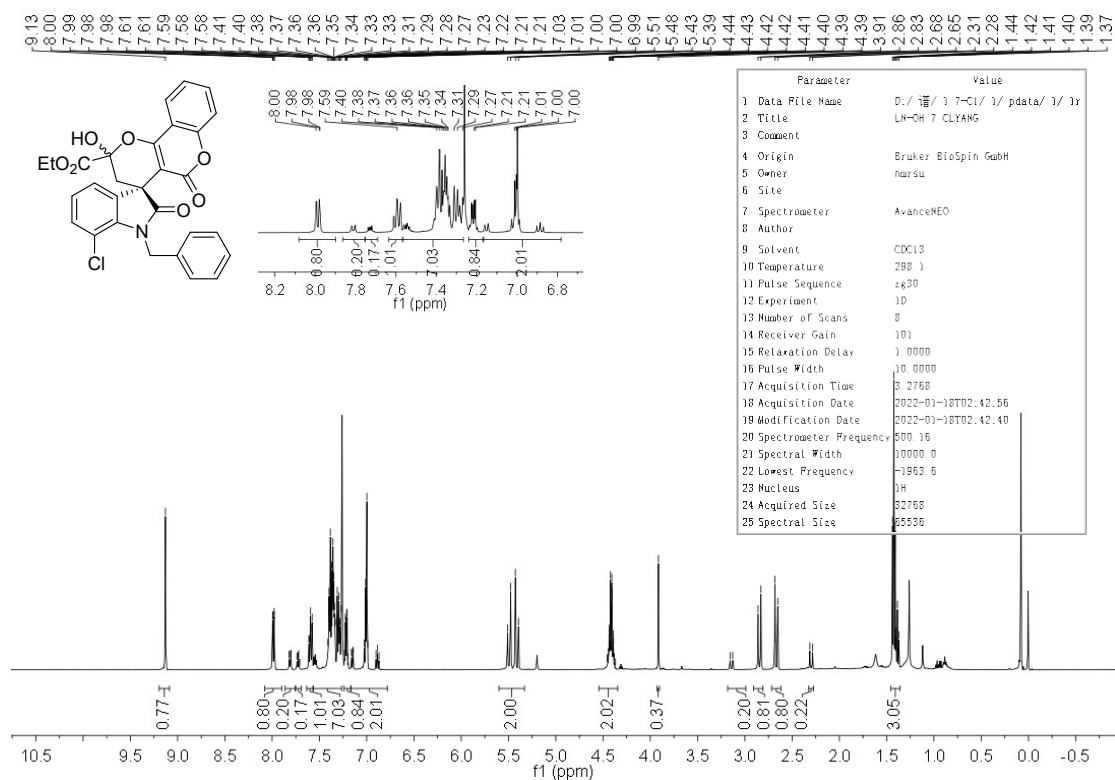

### <sup>13</sup>C NMR of 3ia

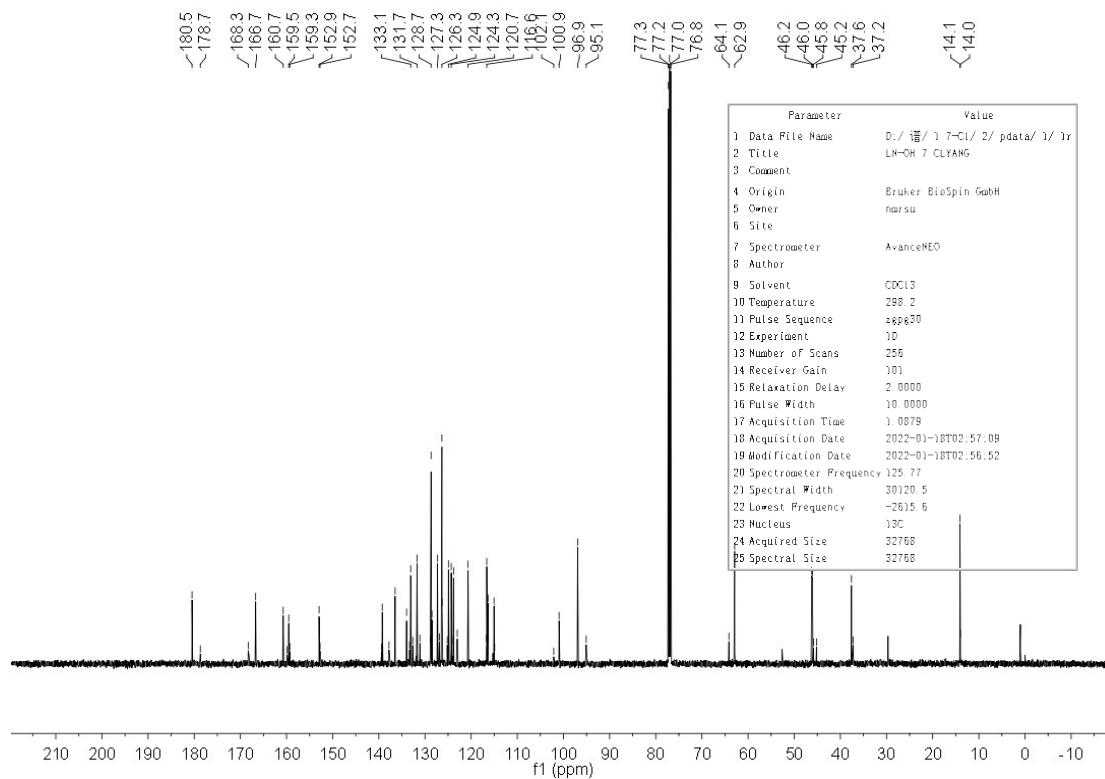

### <sup>1</sup>H NMR of 3ja

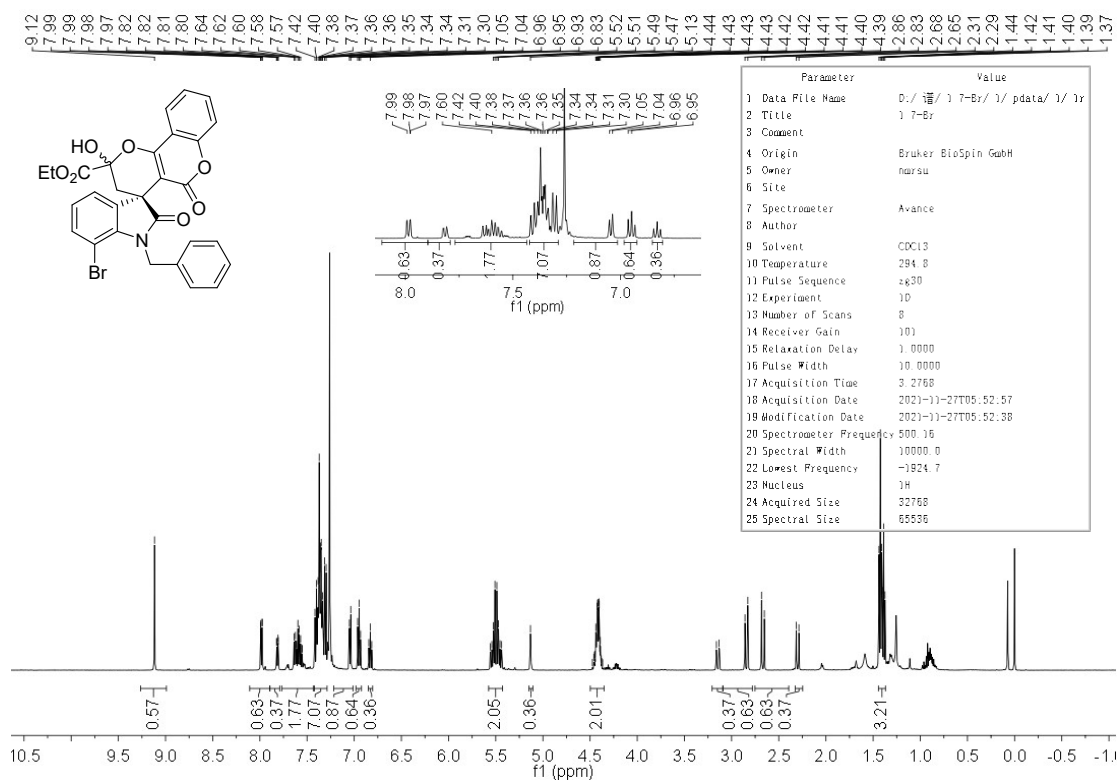

### <sup>13</sup>C NMR of 3ja

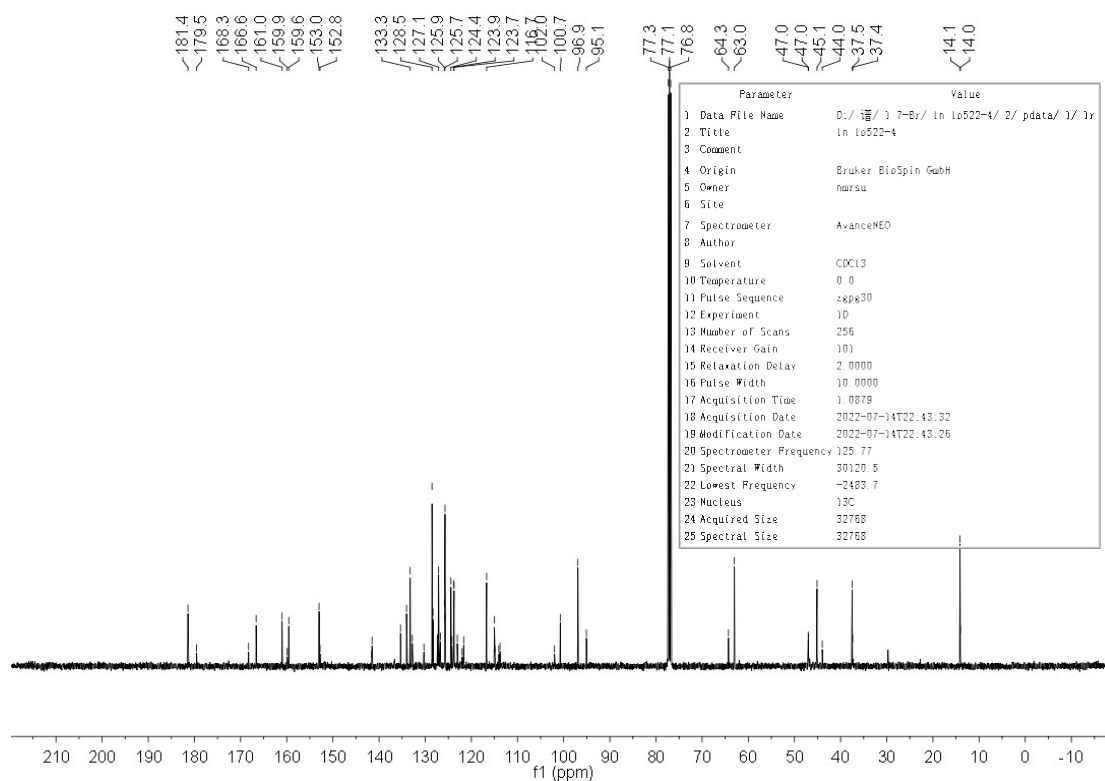

### <sup>1</sup>H NMR of 3ka

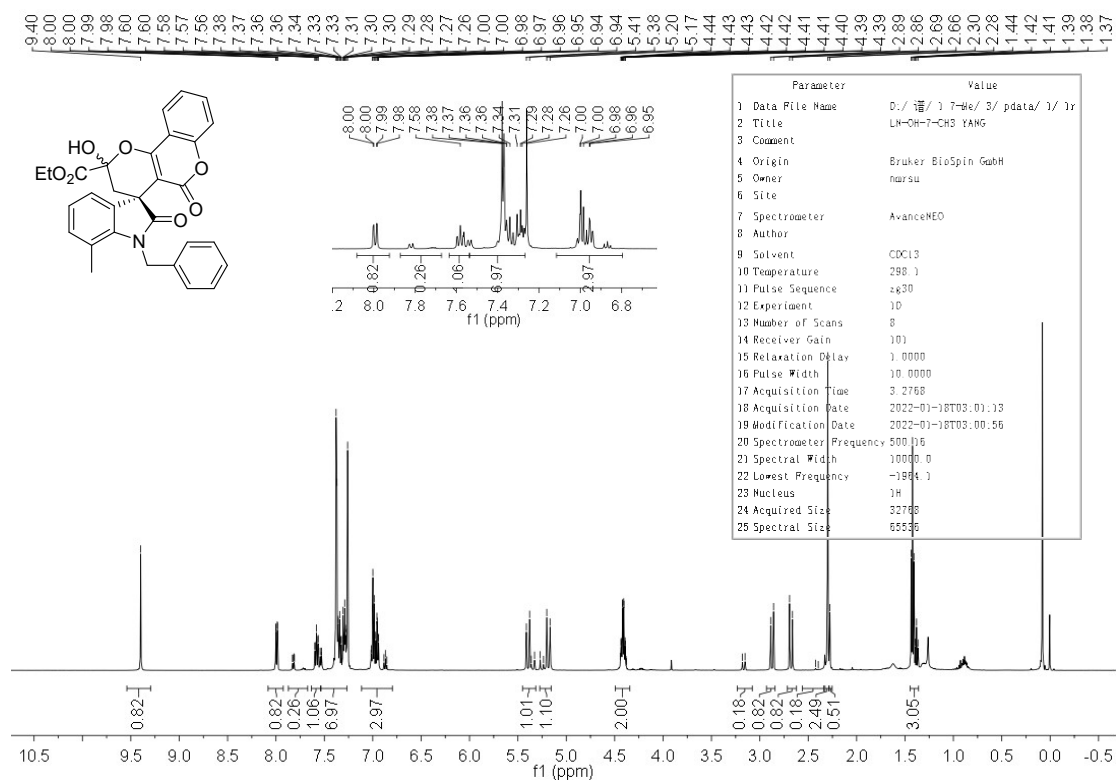

### <sup>13</sup>C NMR of 3ka

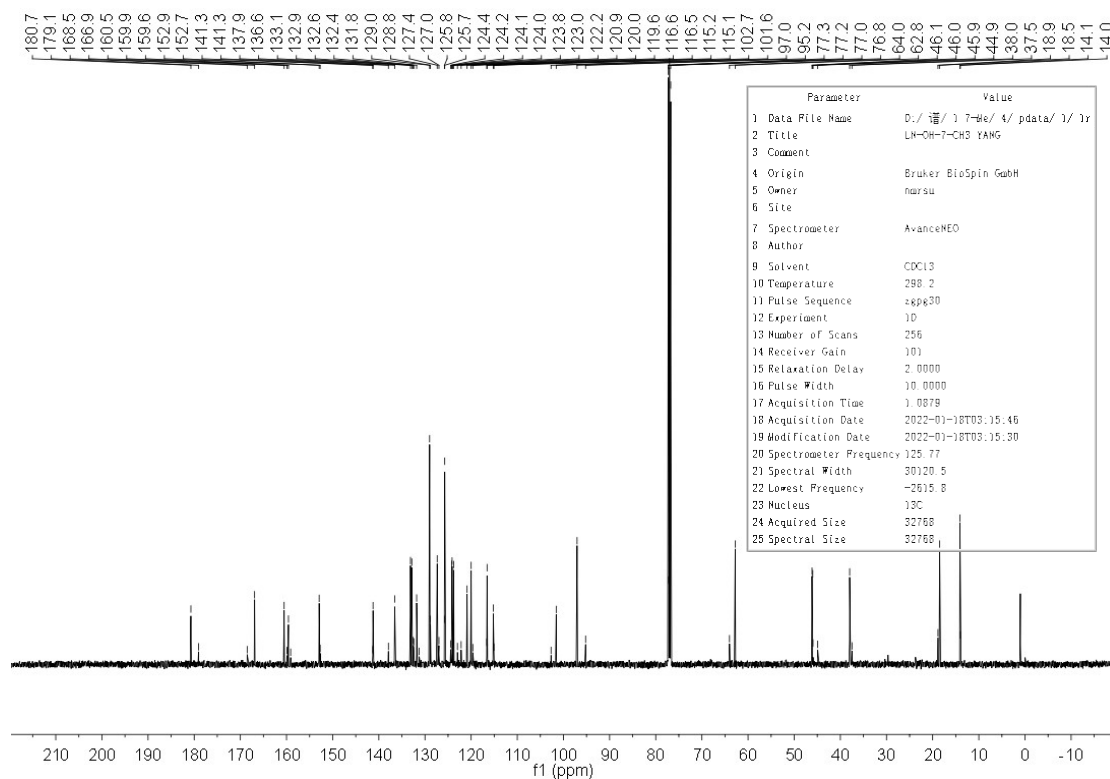

### <sup>1</sup>H NMR of 3la

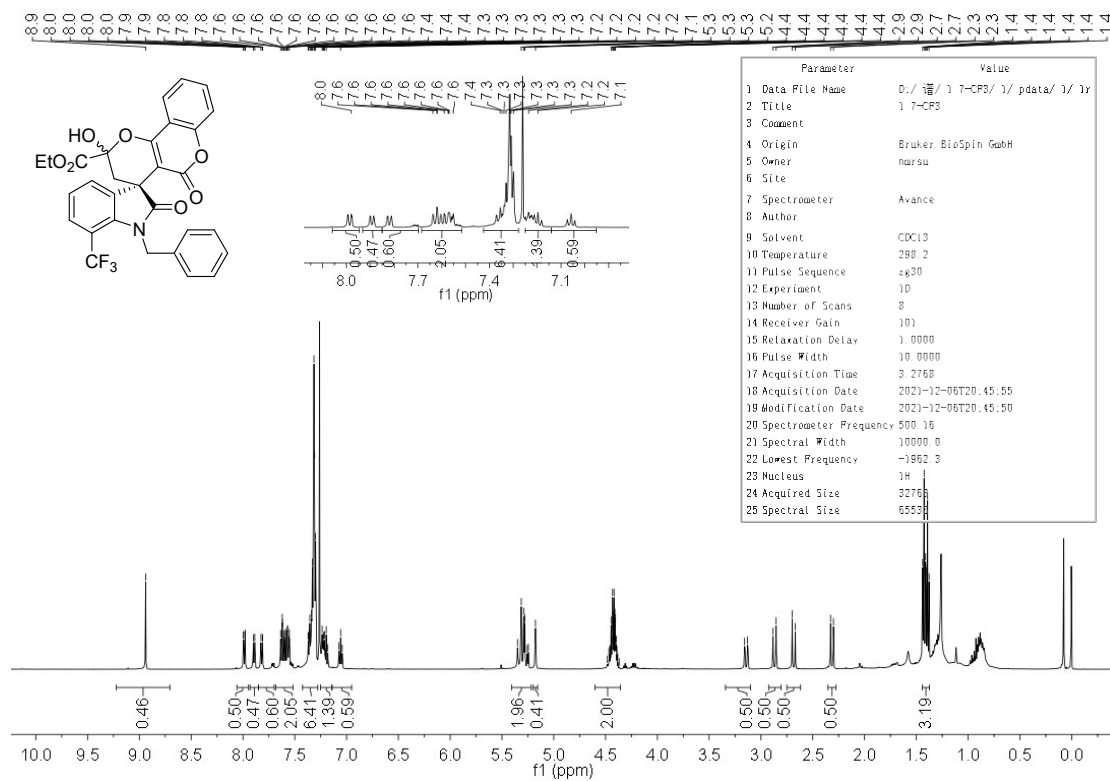

### <sup>13</sup>C NMR of 3la

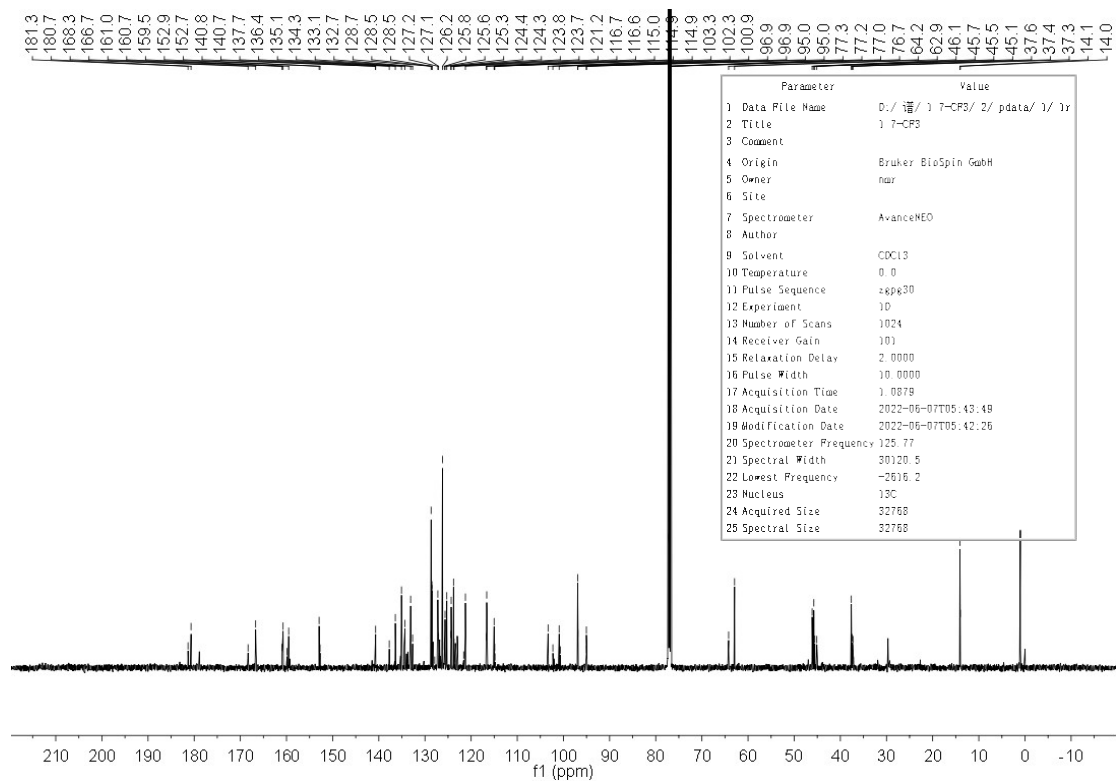

### <sup>19</sup>F NMR of 3la

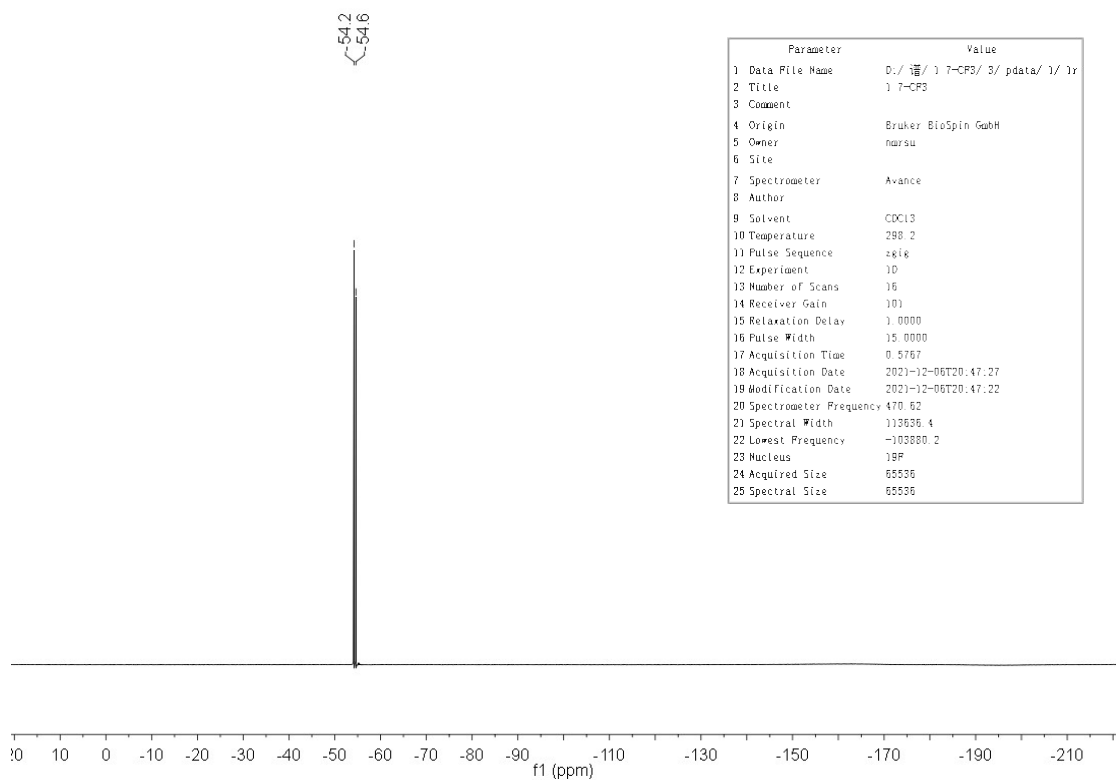

### <sup>1</sup>H NMR of **3ma**

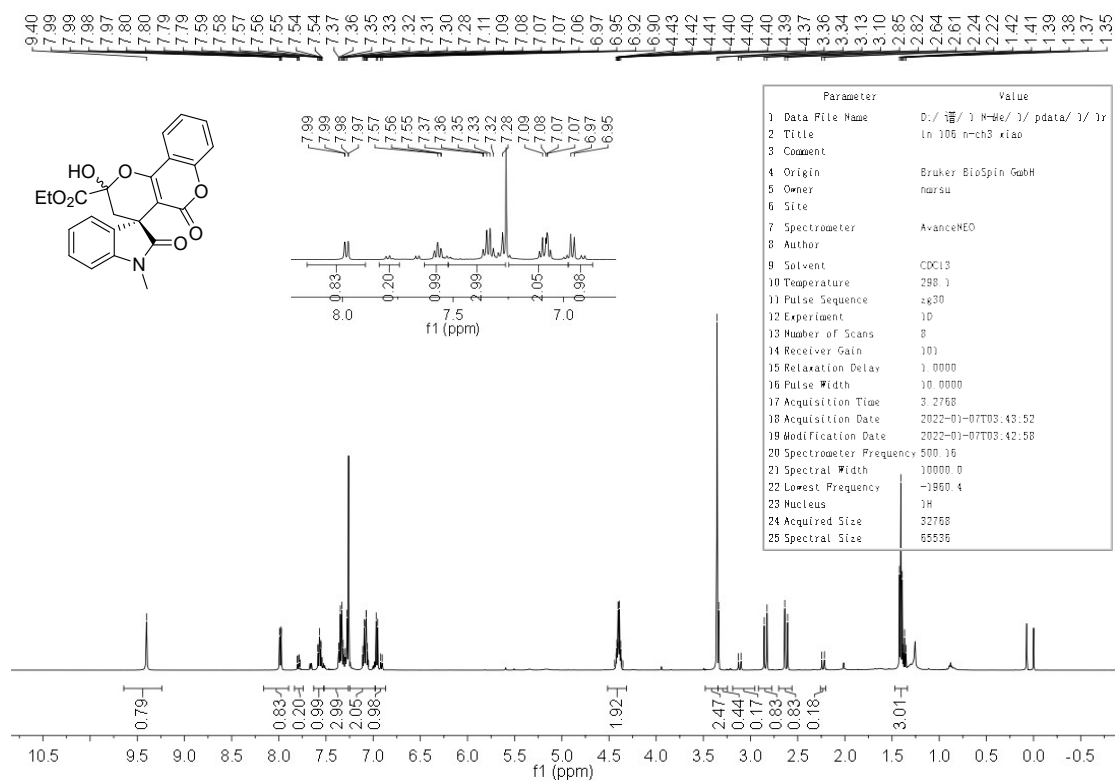

### <sup>13</sup>C NMR of **3ma**

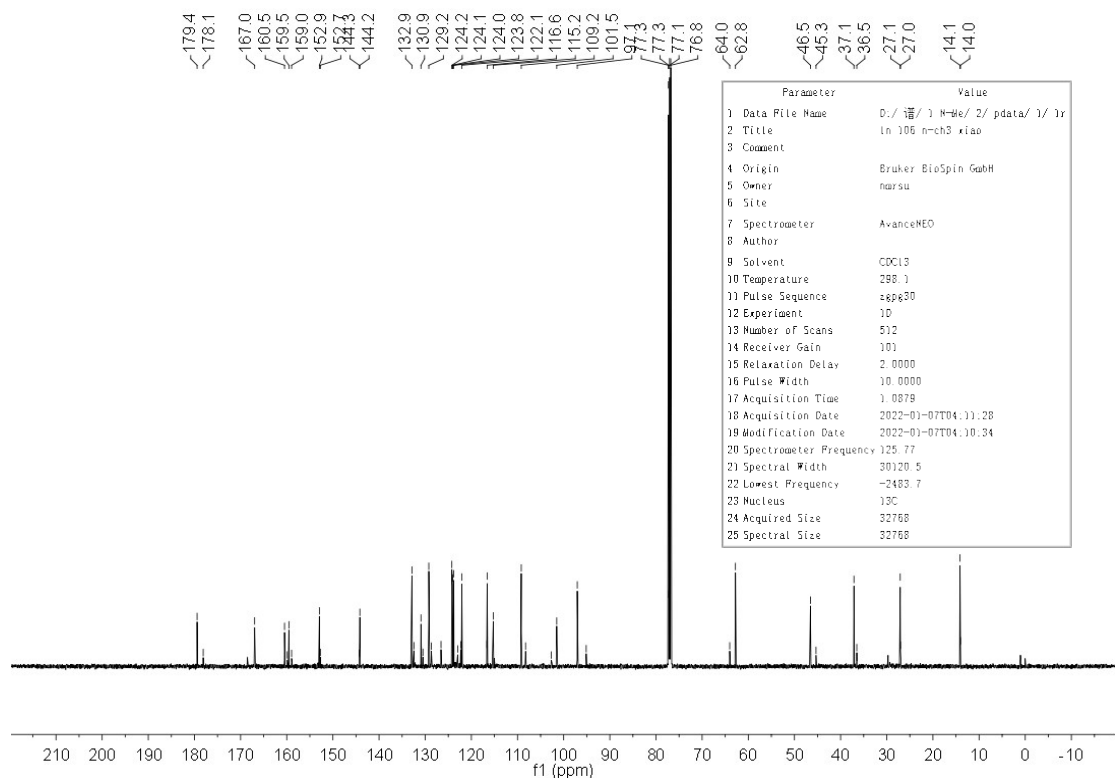

### <sup>1</sup>H NMR of 3ma (acetone-d<sub>6</sub>)

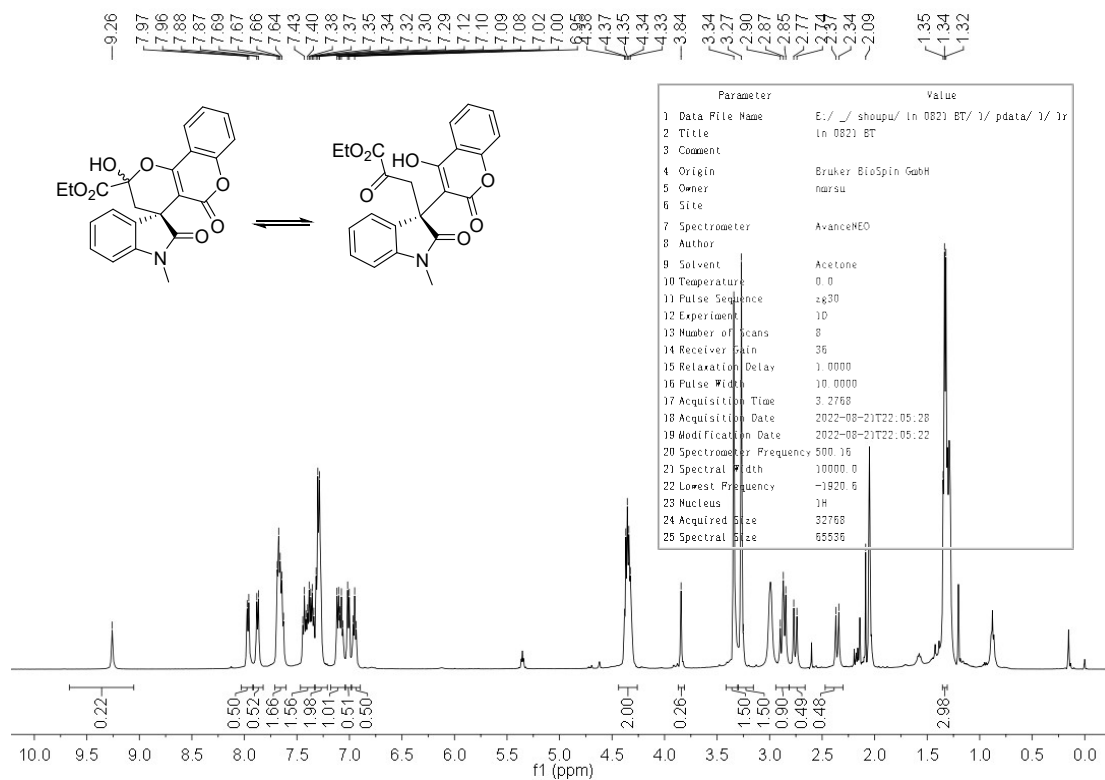

### <sup>13</sup>C NMR of 3ma (acetone-d<sub>6</sub>)

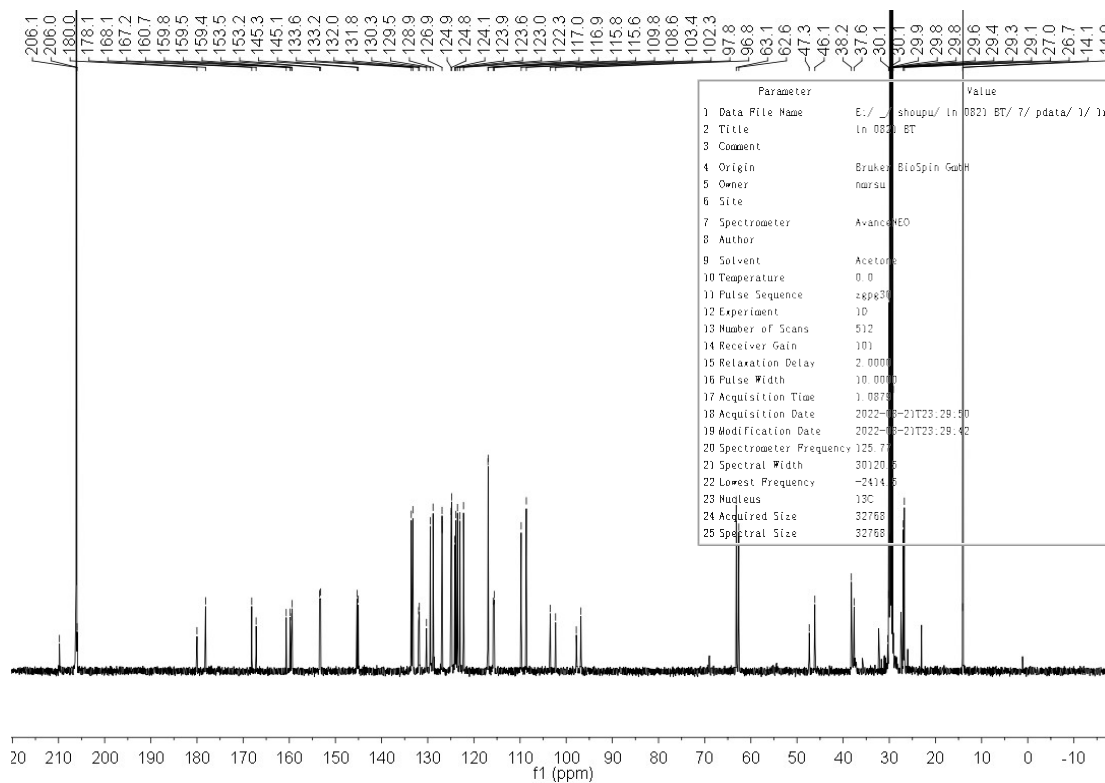

### <sup>1</sup>H NMR of 3na

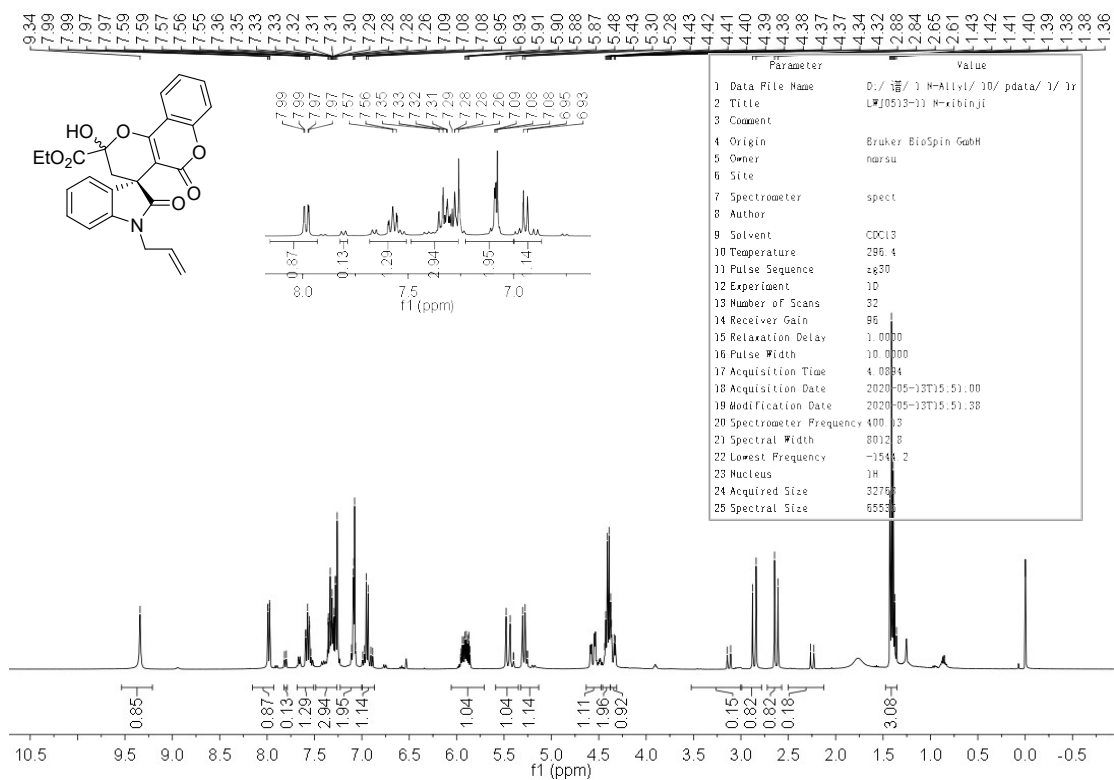

### <sup>13</sup>C NMR of 3na

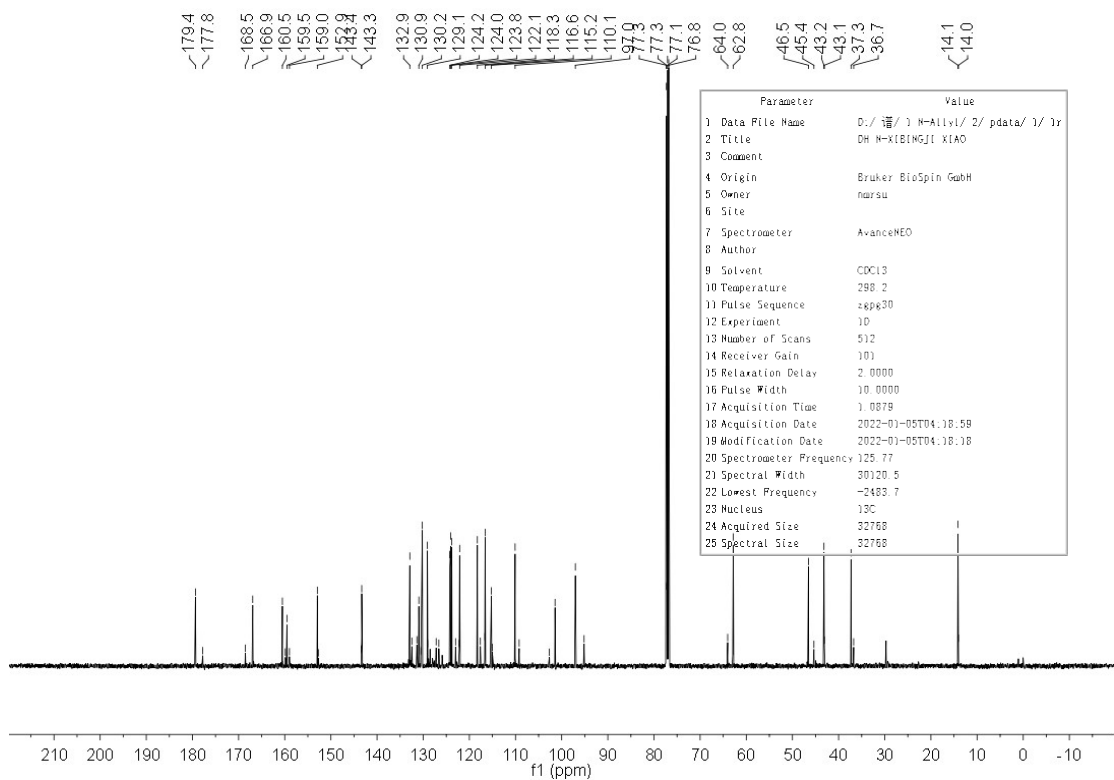



### <sup>1</sup>H NMR of 30a

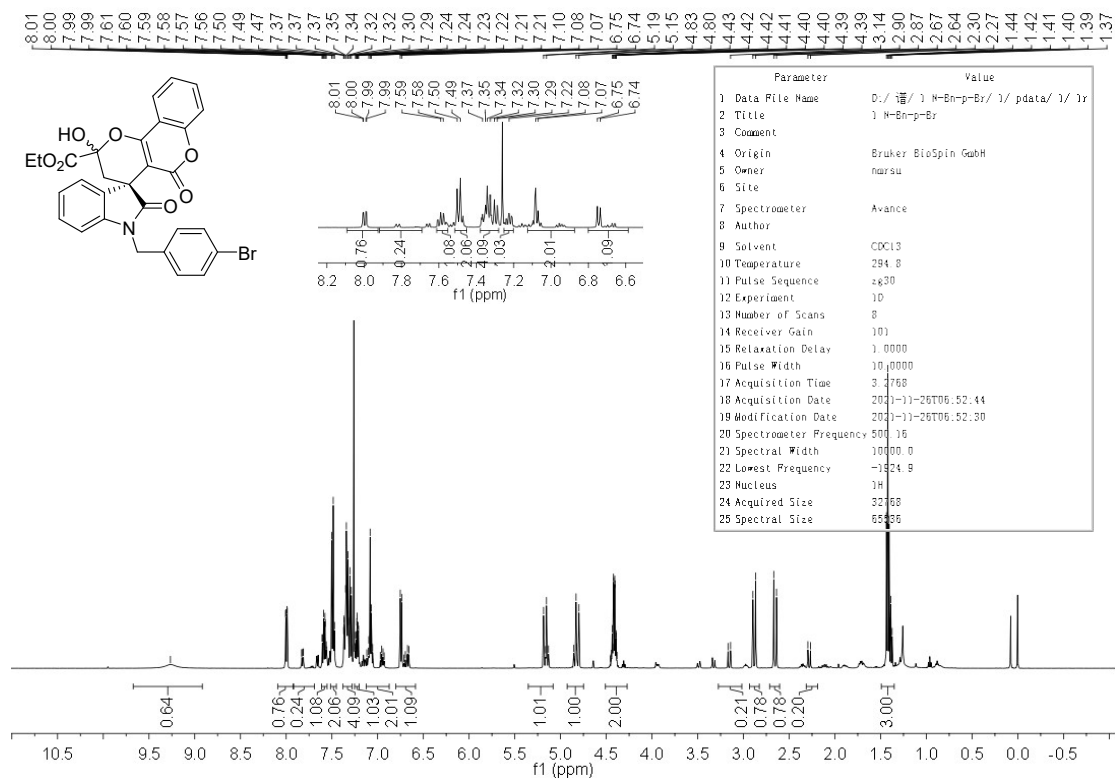

### <sup>13</sup>C NMR of 30a

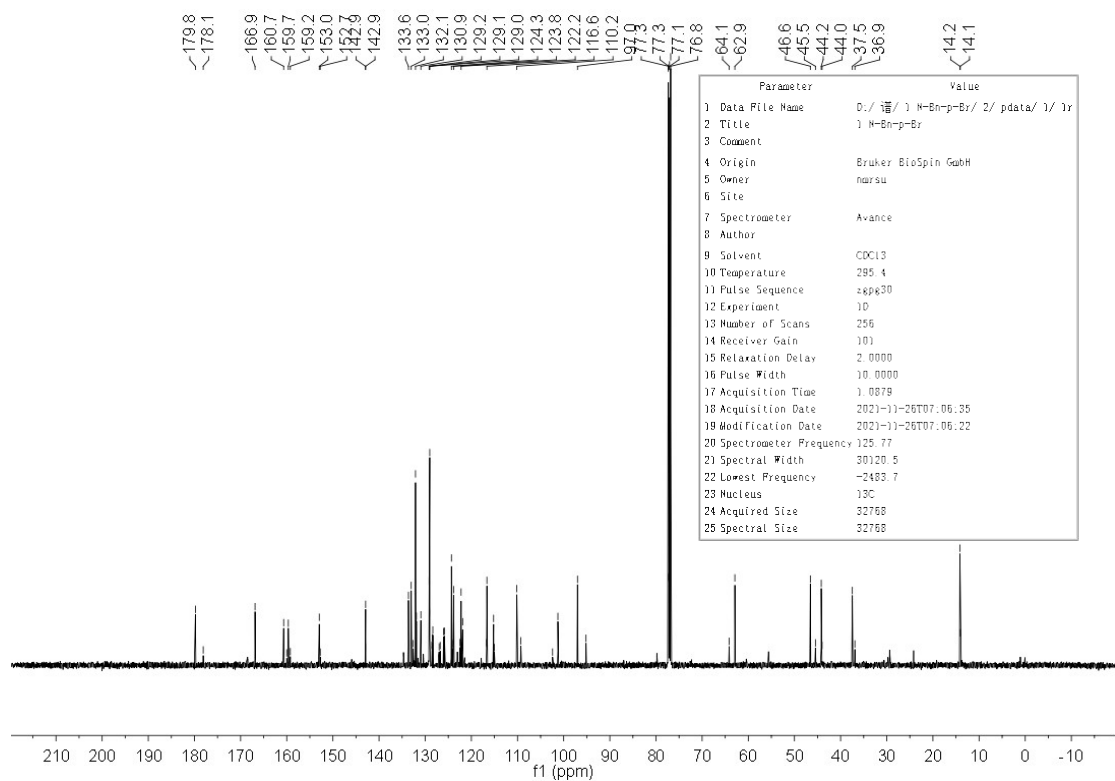

# <sup>1</sup>H NMR of 3pa

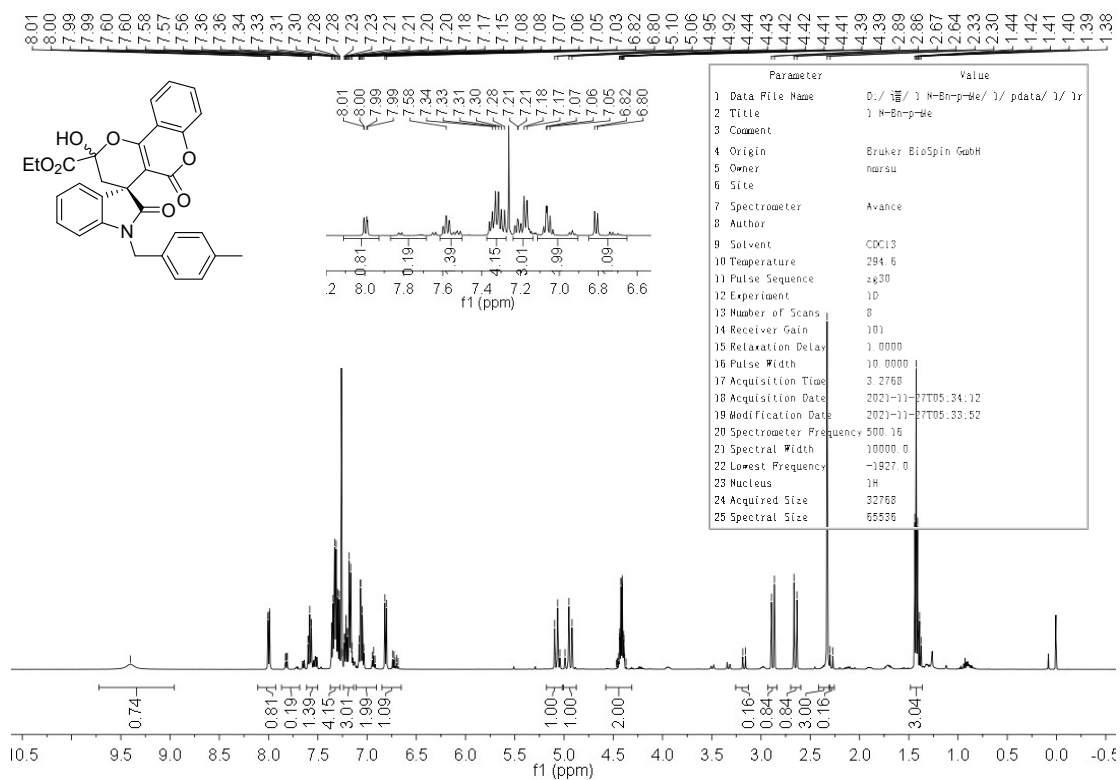

# <sup>13</sup>C NMR of 3pa

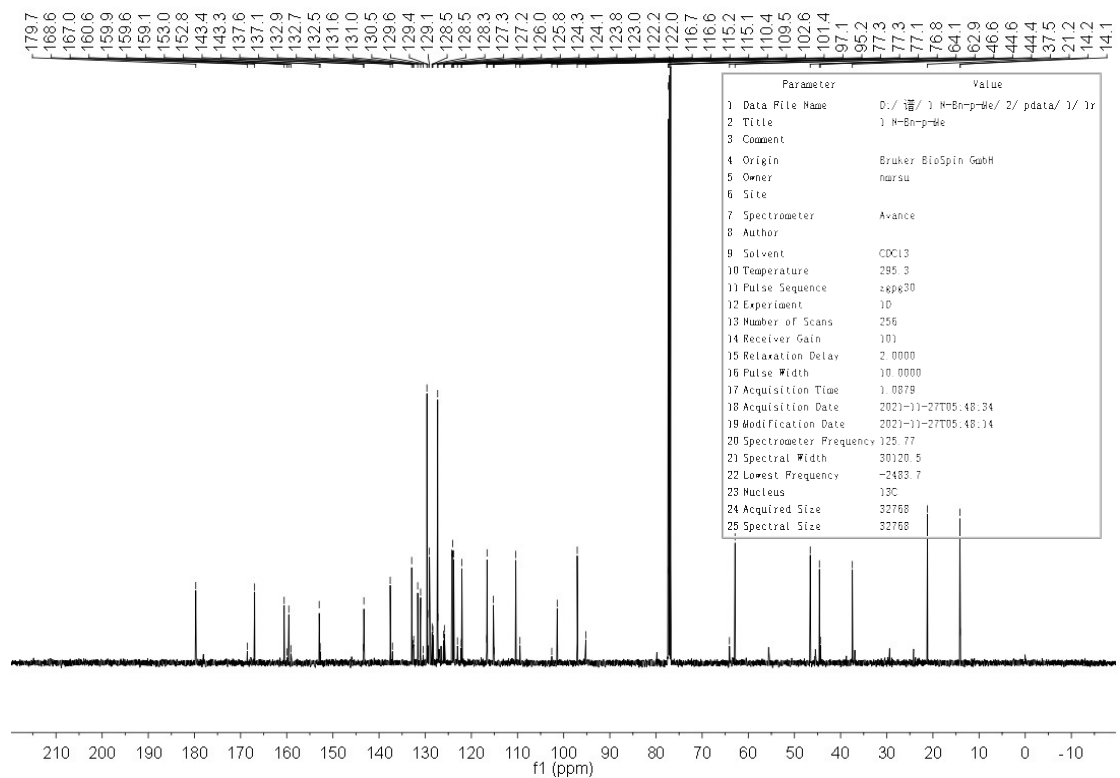

### <sup>1</sup>H NMR of 3qa

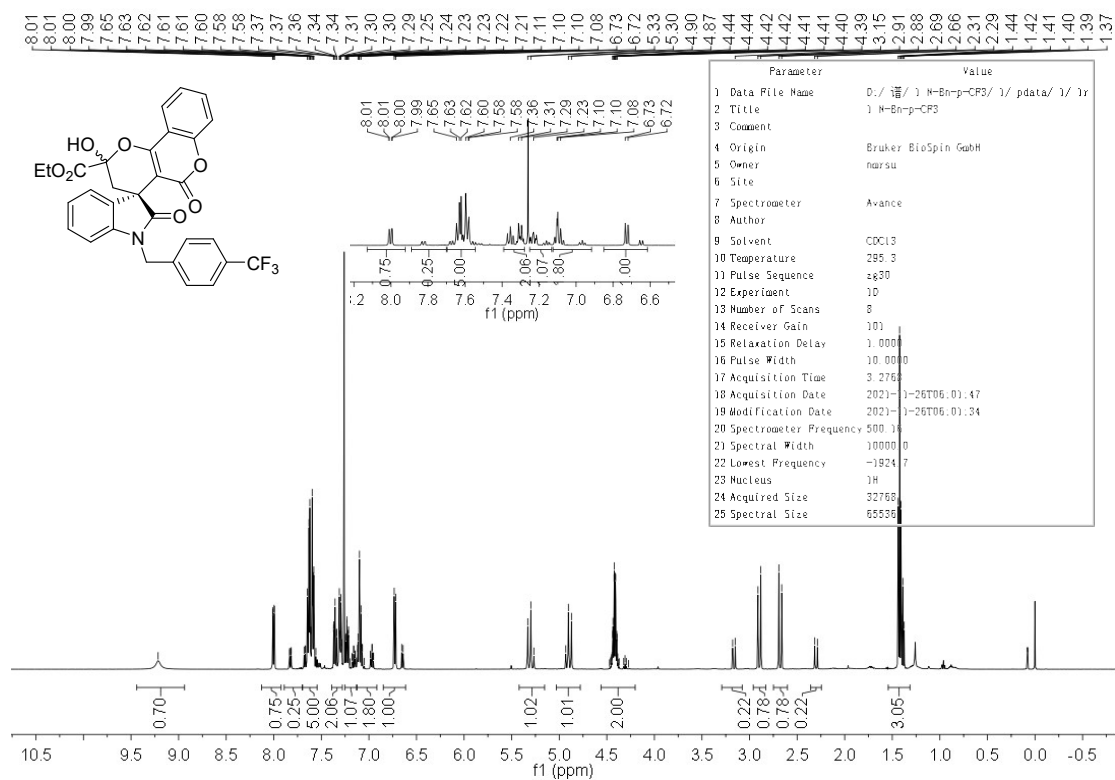

### <sup>13</sup>C NMR of 3qa

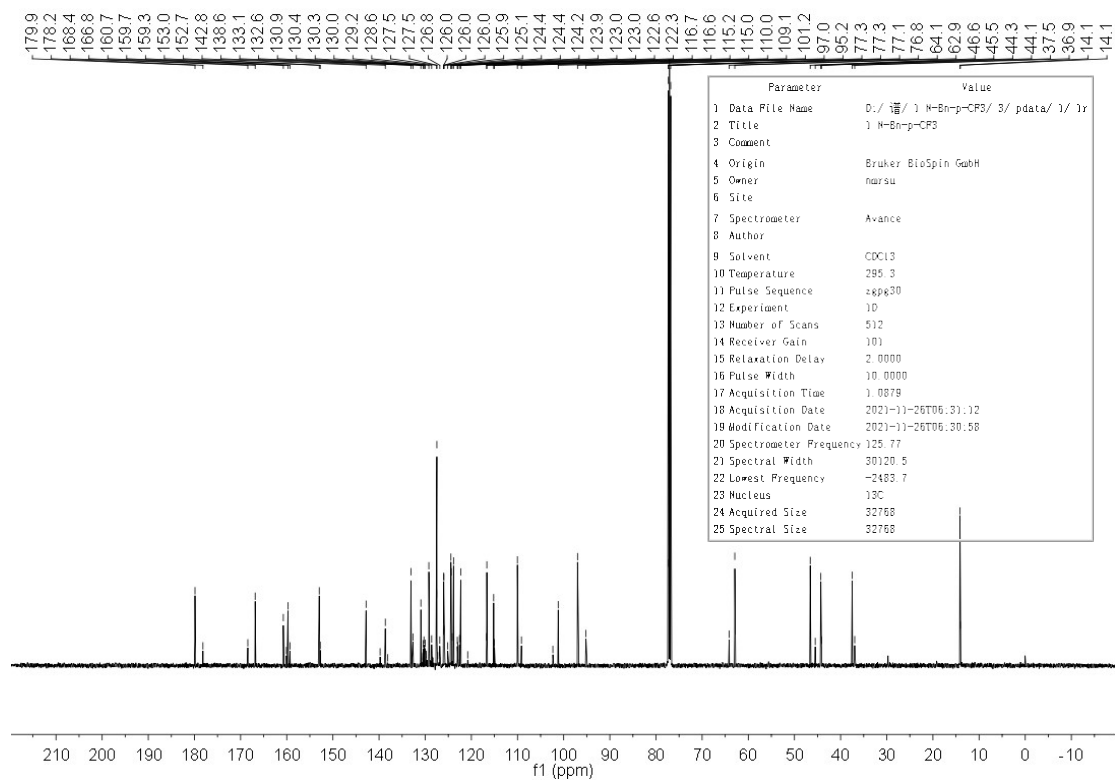

### <sup>19</sup>F NMR of 3qa

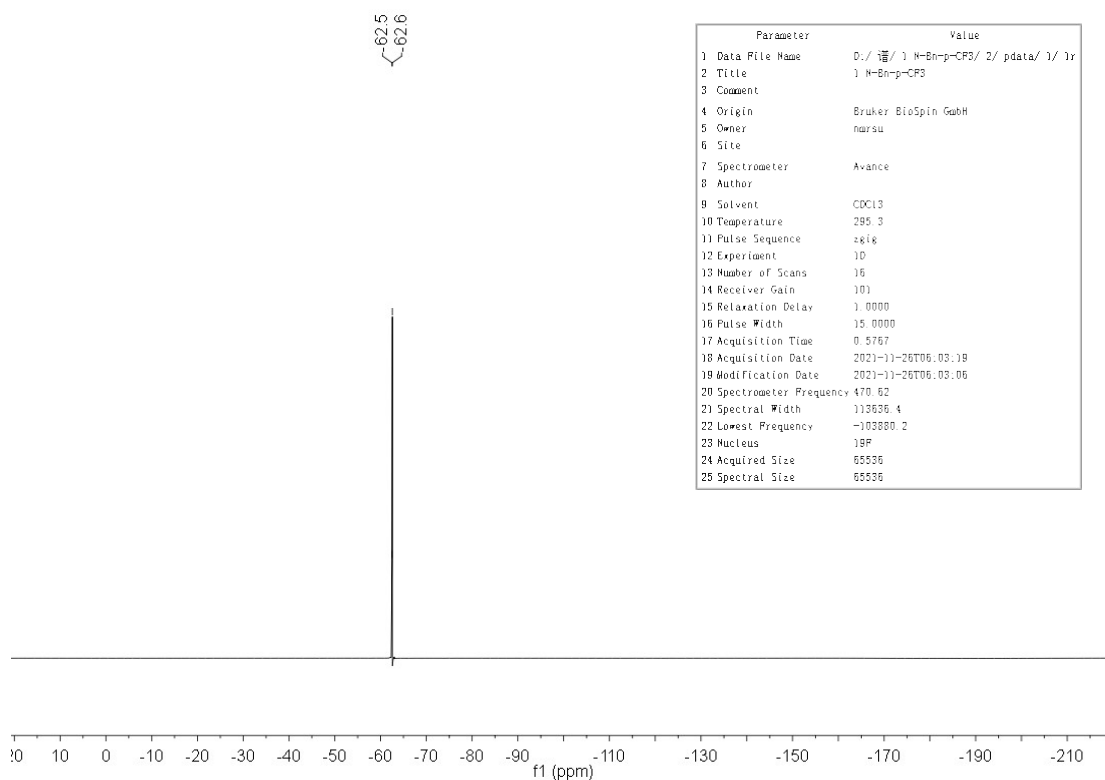

### <sup>1</sup>H NMR of 3ab

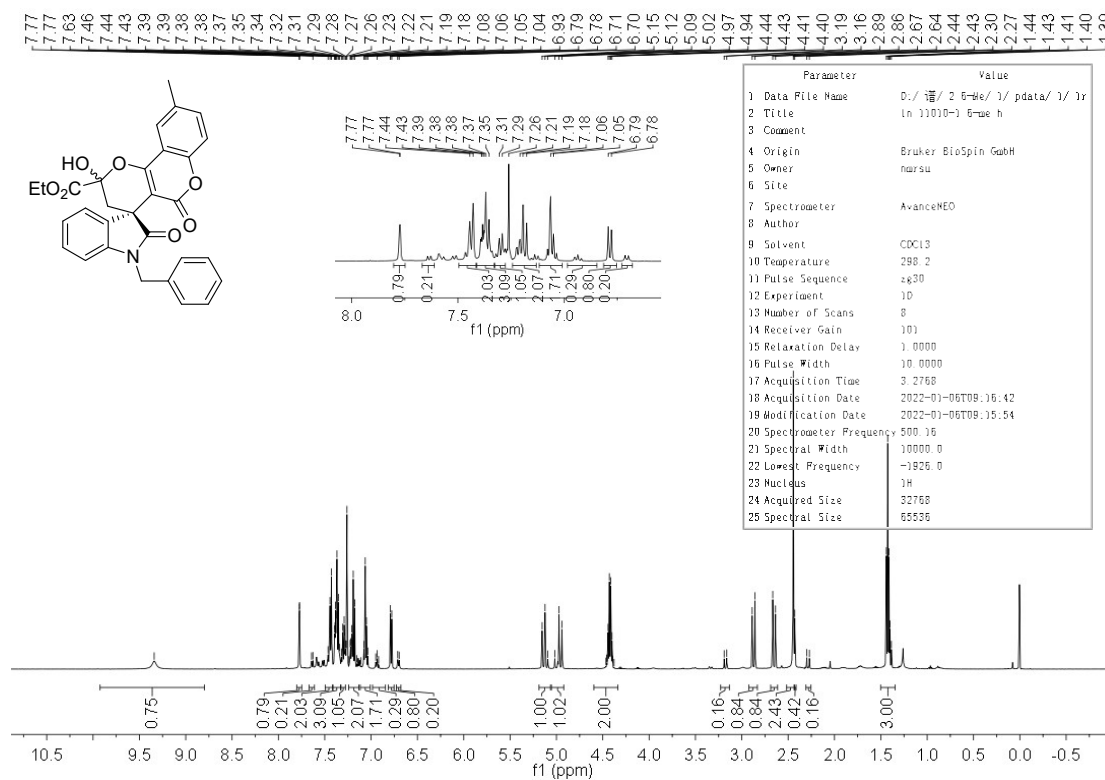

### <sup>13</sup>C NMR of **3ab**

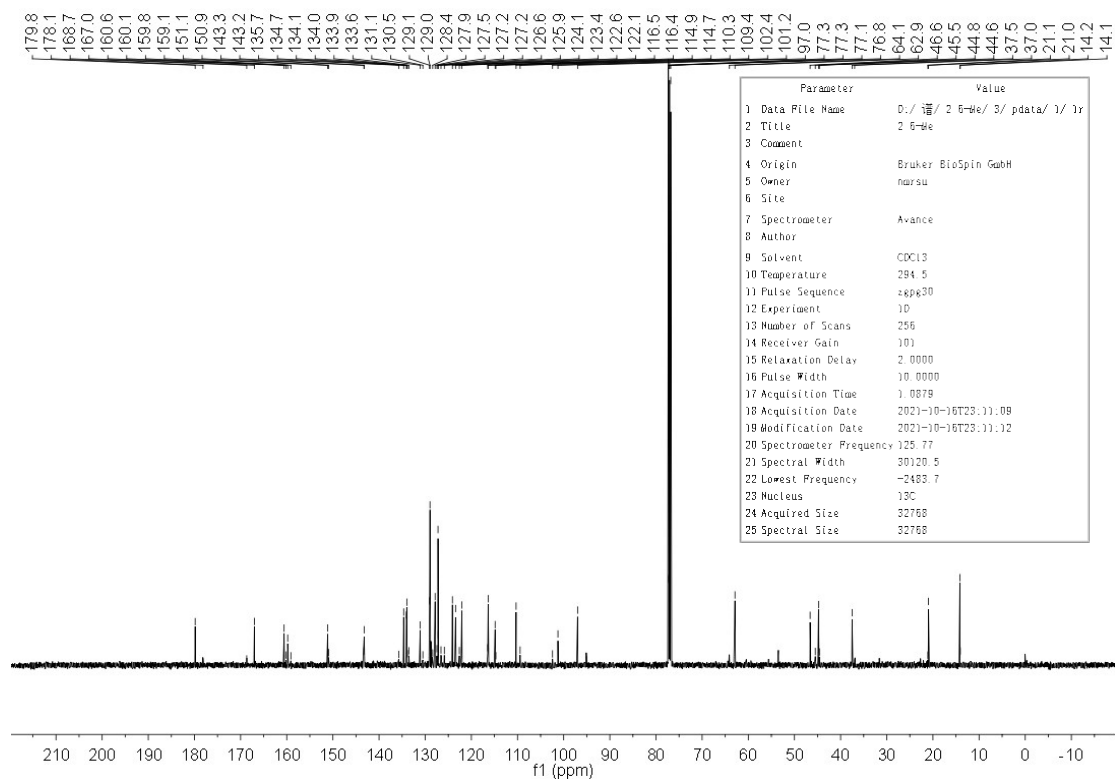

### <sup>1</sup>H NMR of **3ac**

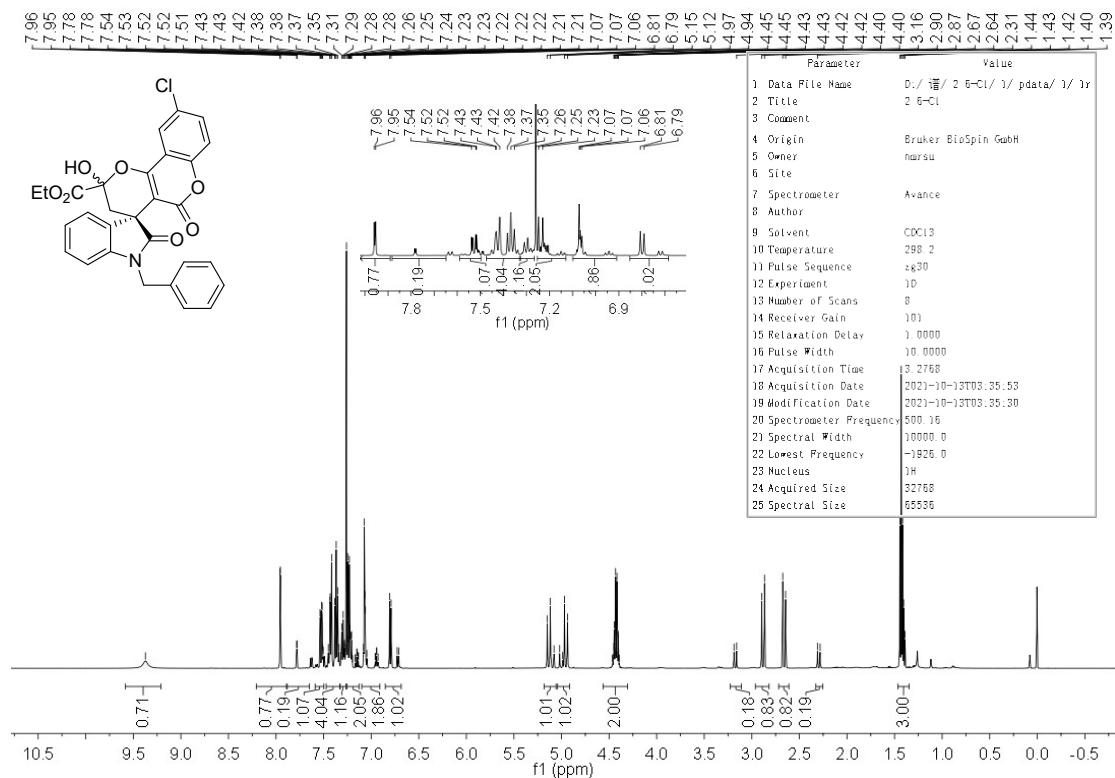

### <sup>13</sup>C NMR of **3ac**

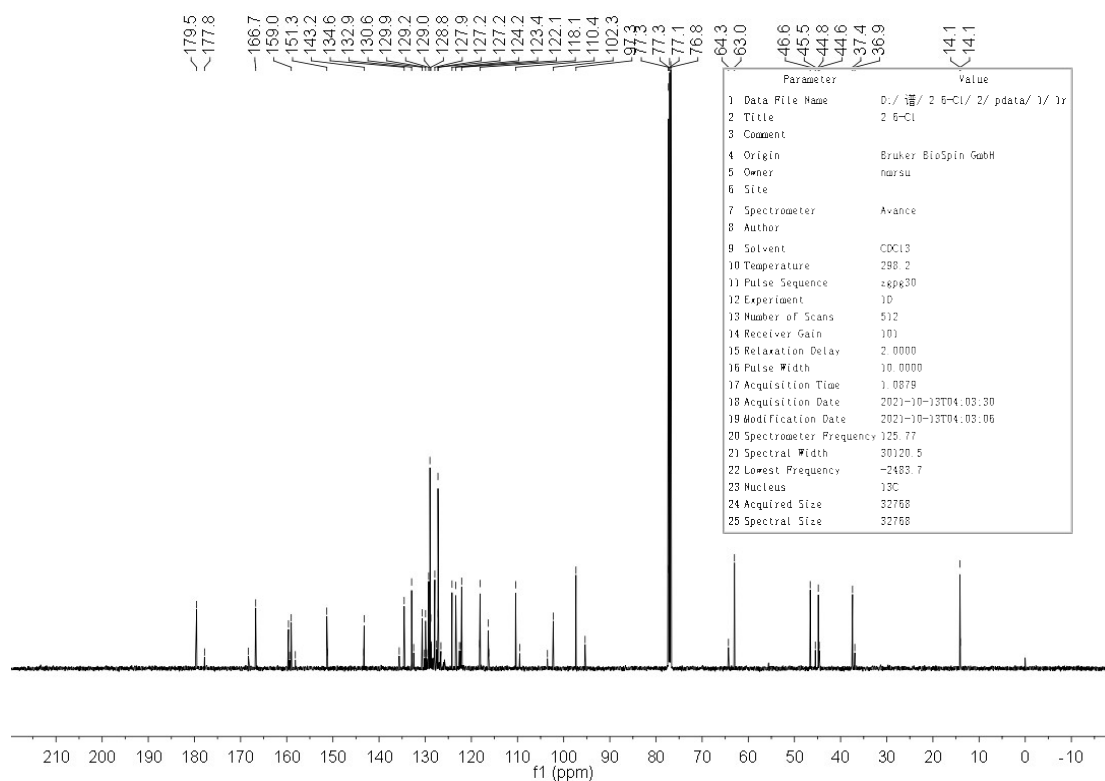

### <sup>1</sup>H NMR of **3ad**

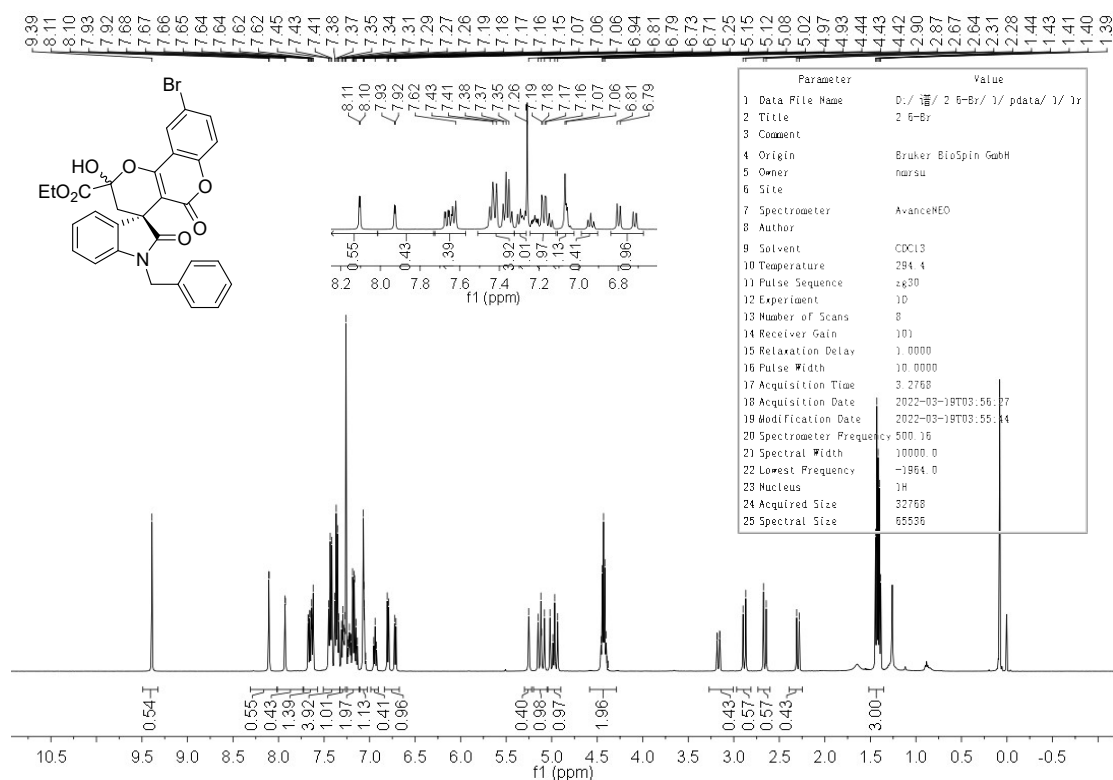

### <sup>13</sup>C NMR of 3ad

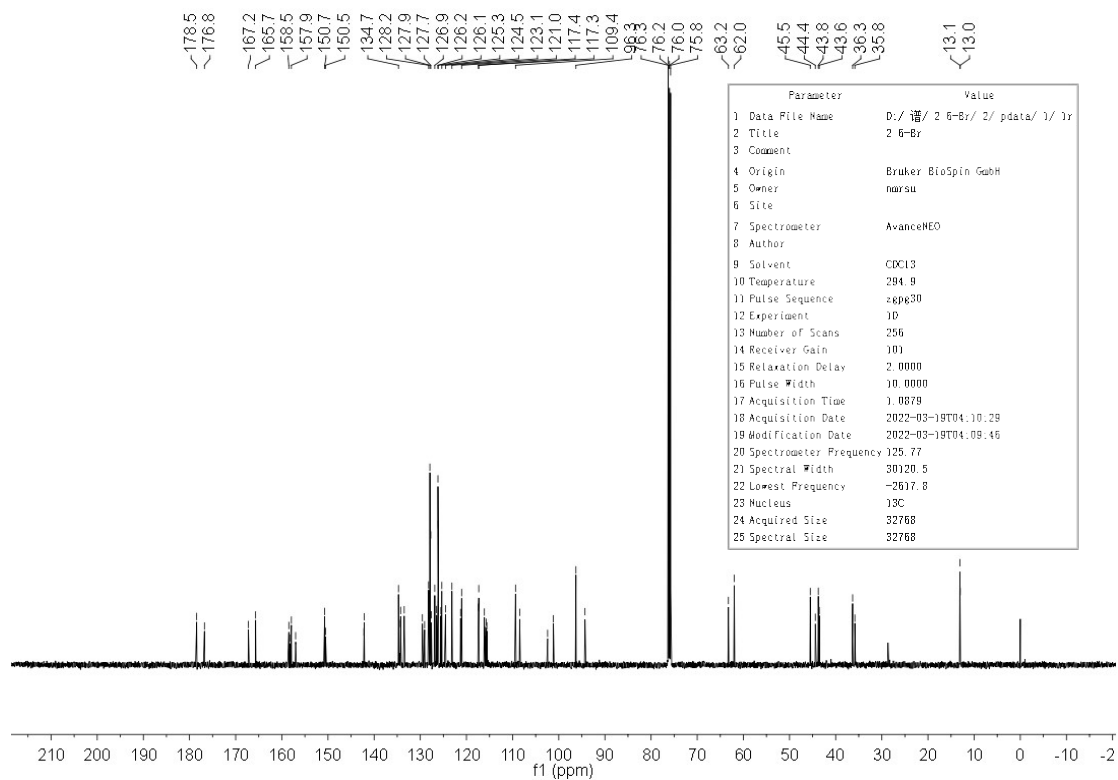

### <sup>1</sup>H NMR of 3ae

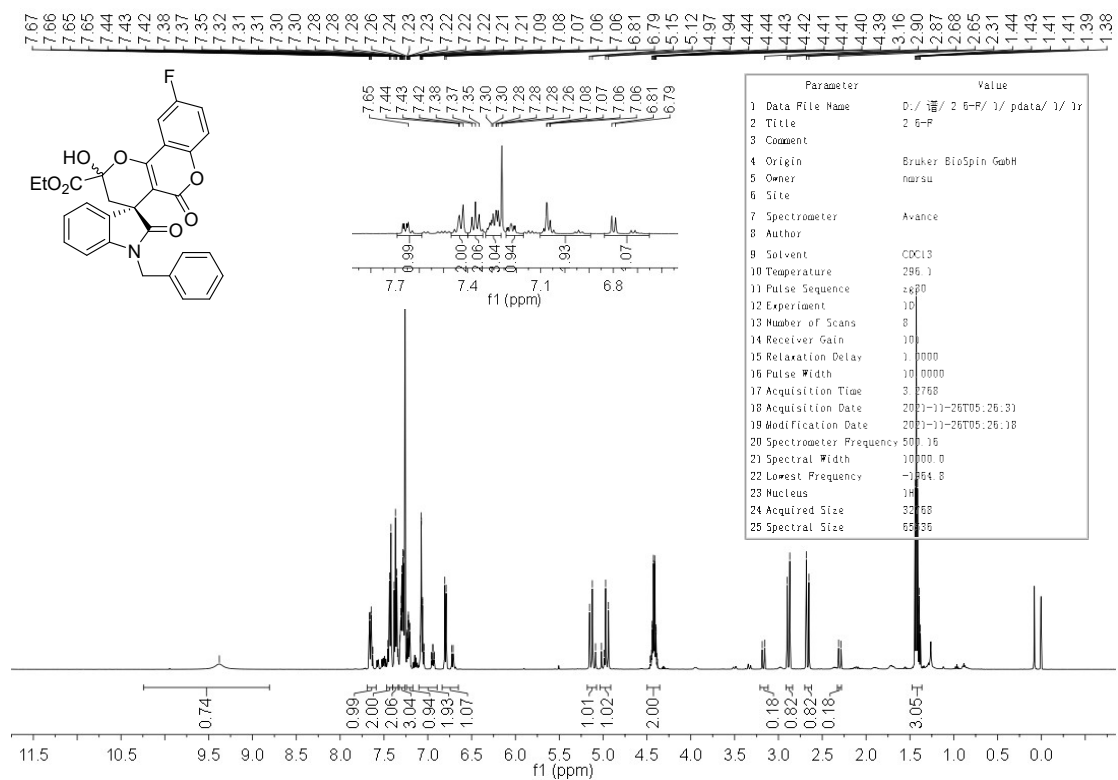

### <sup>13</sup>C NMR of 3ae

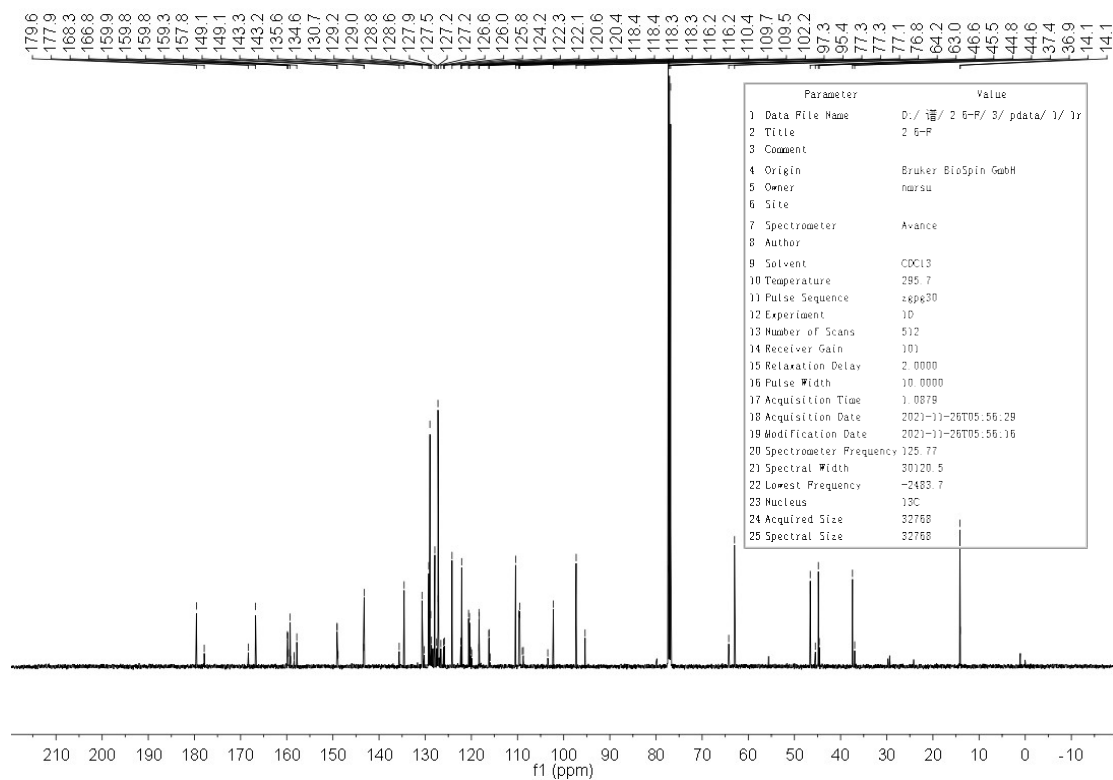

### <sup>19</sup>F NMR of 3ae

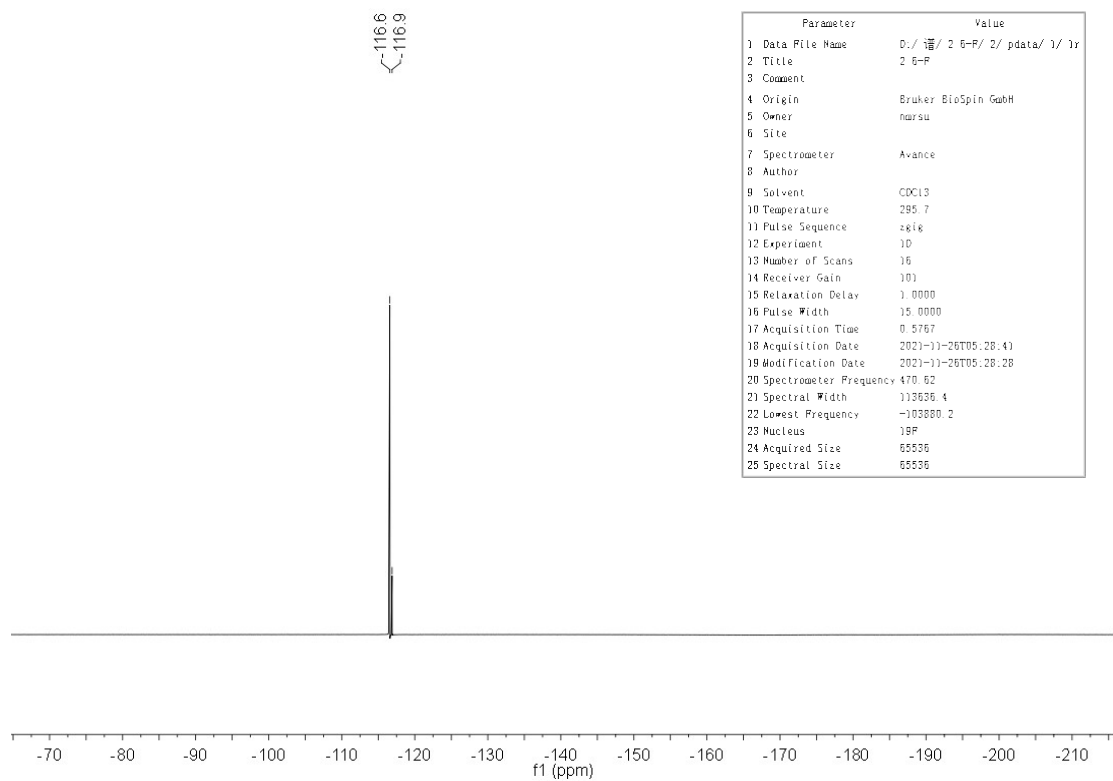



### <sup>1</sup>H NMR of 3af

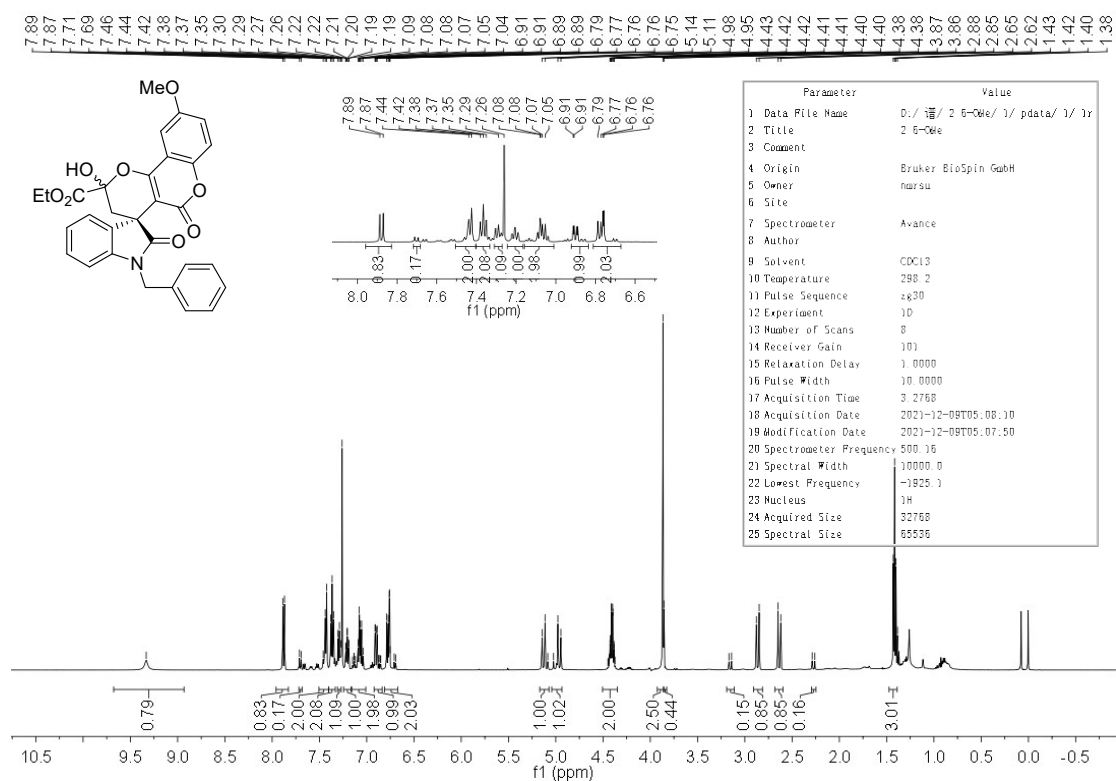

### <sup>13</sup>C NMR of 3af

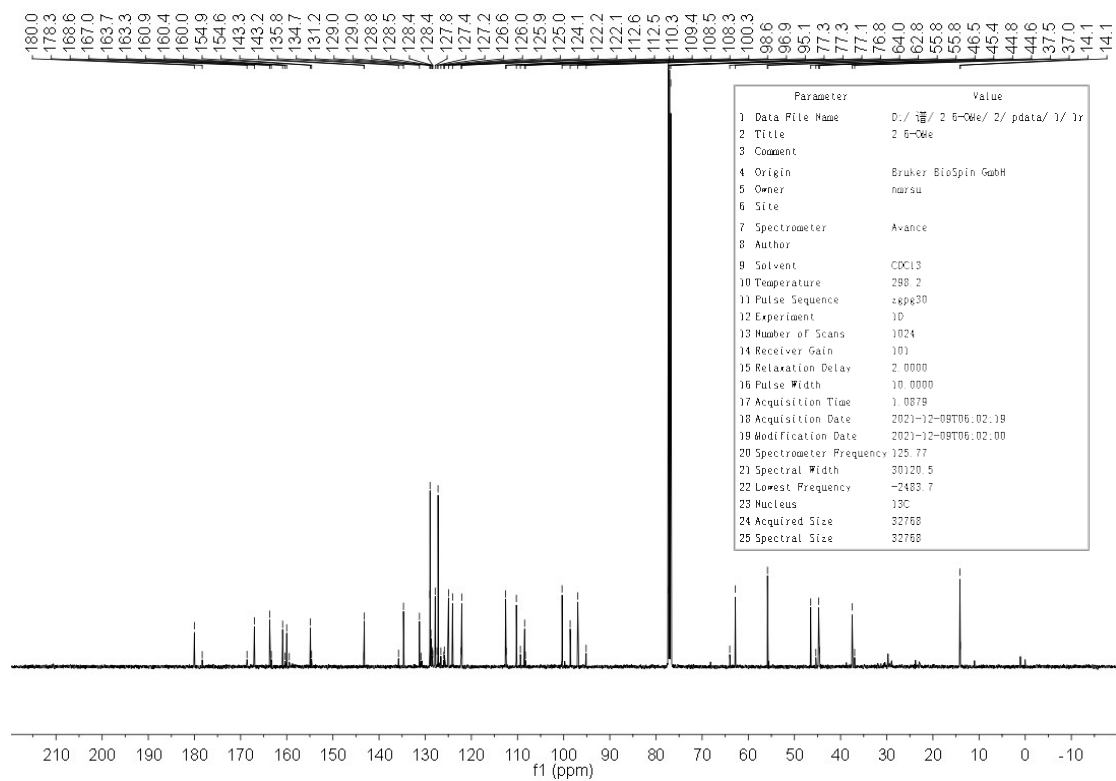

### <sup>1</sup>H NMR of 3ag

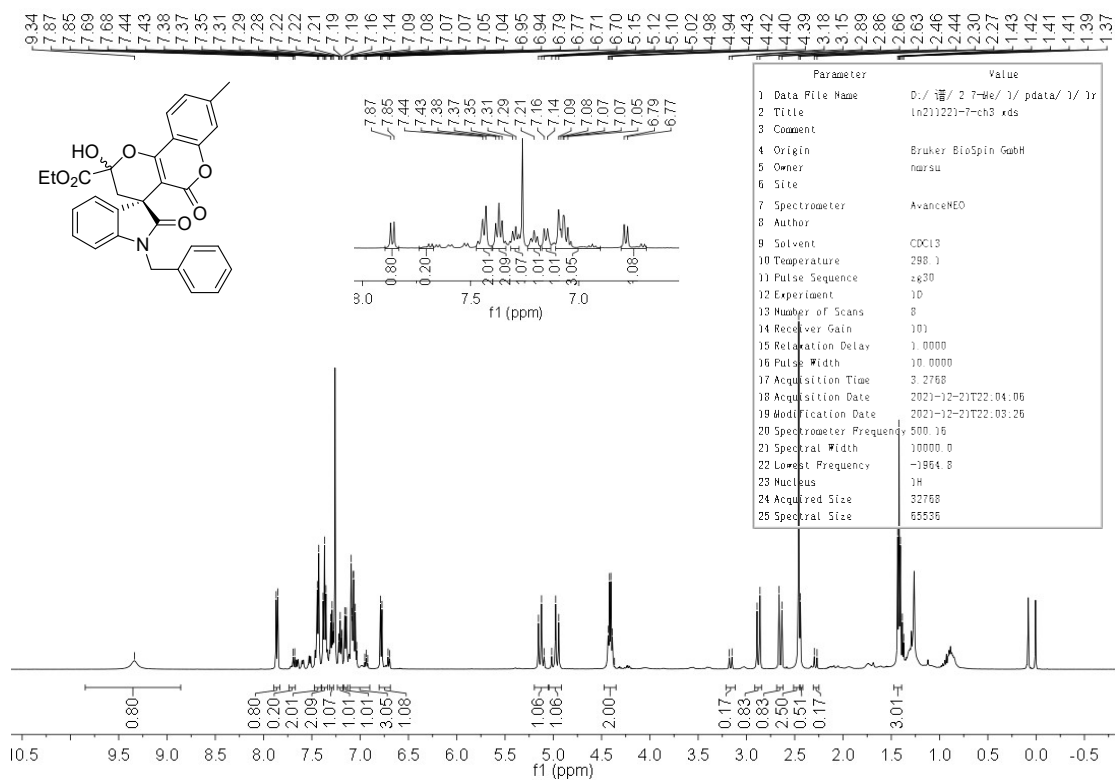

### <sup>13</sup>C NMR of 3ag

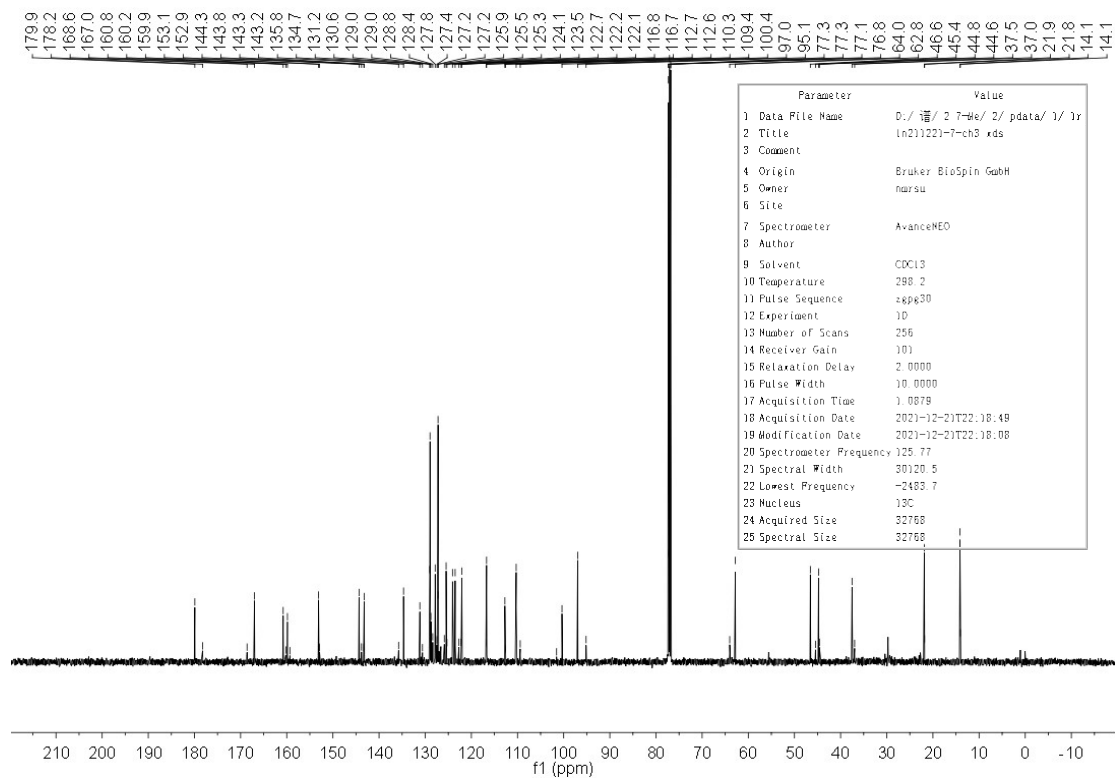

### <sup>1</sup>H NMR of **3ah**

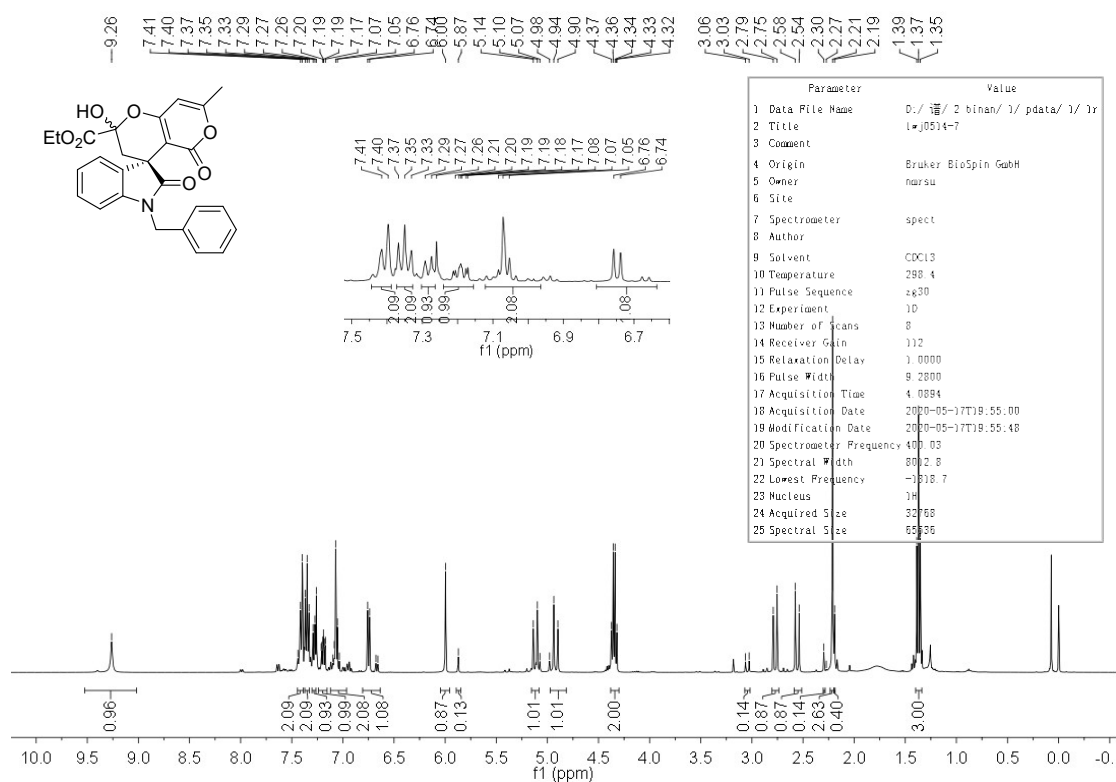

### <sup>13</sup>C NMR of **3ah**

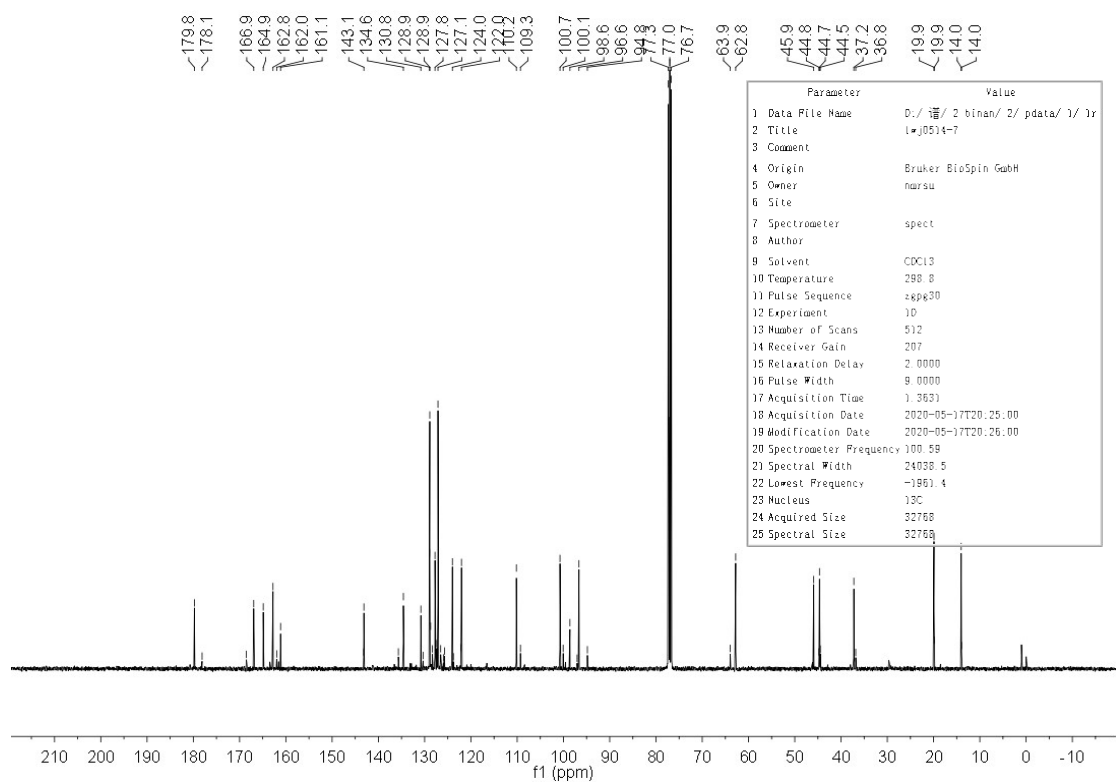

# <sup>1</sup>H NMR of 3ai

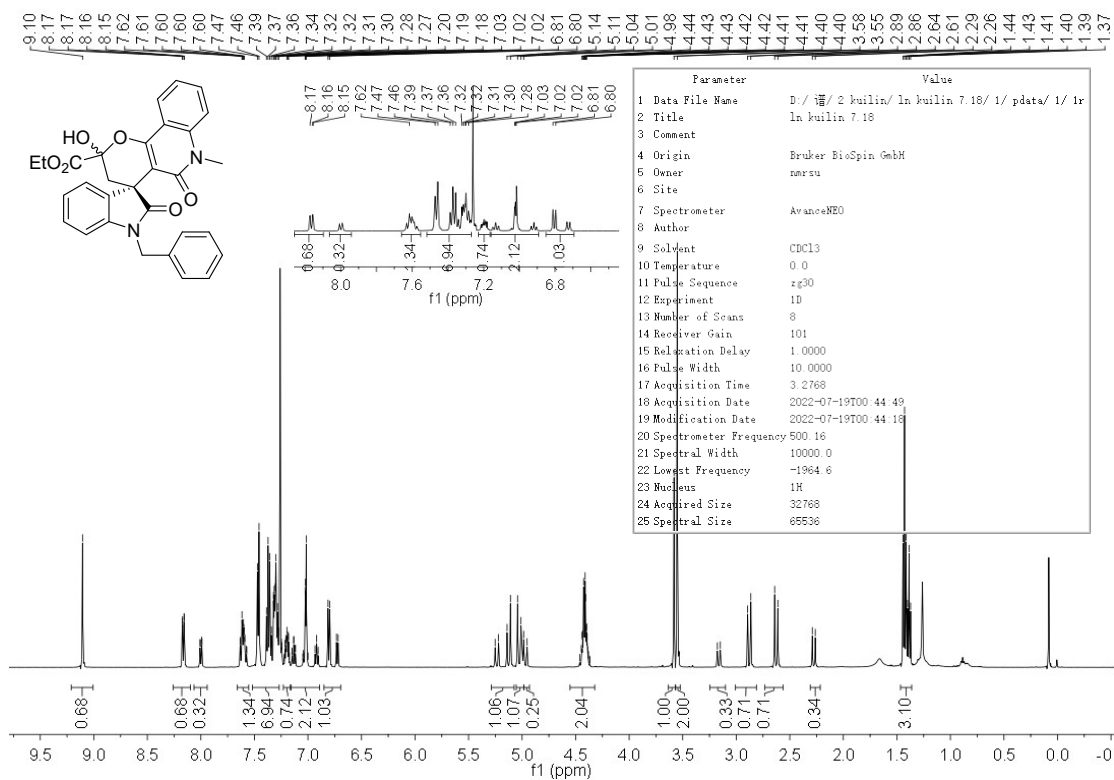

# <sup>13</sup>C NMR of 3ai

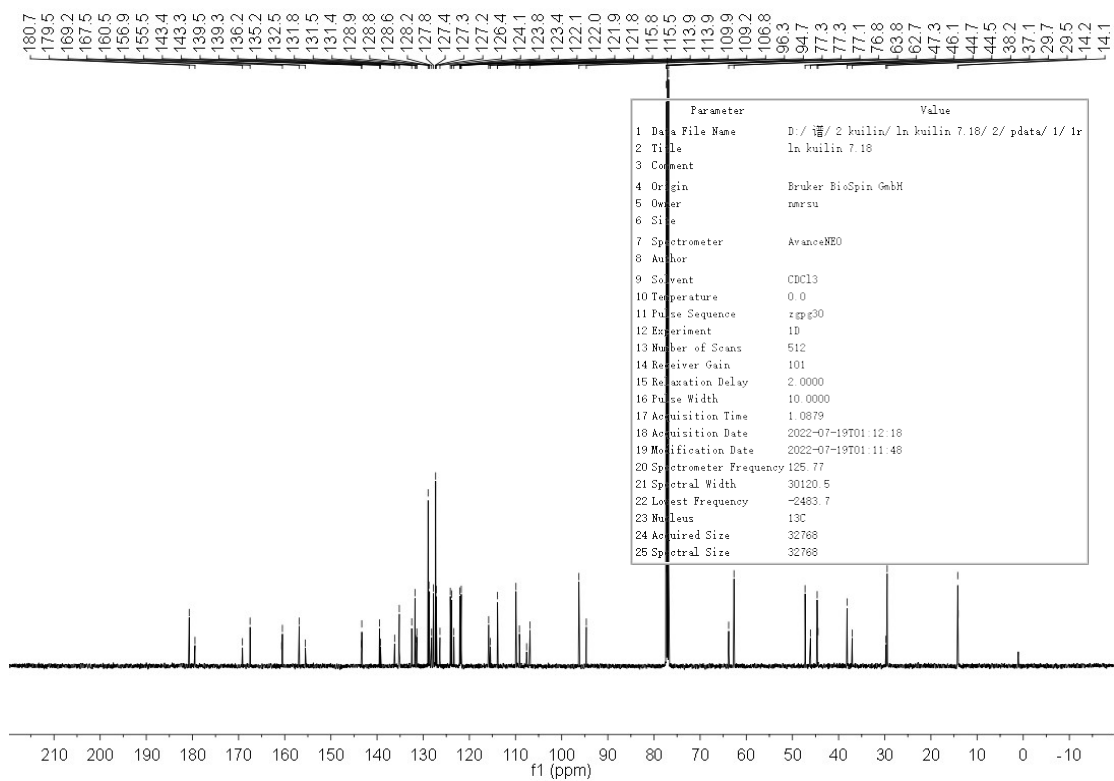

### <sup>1</sup>H NMR of 3aj

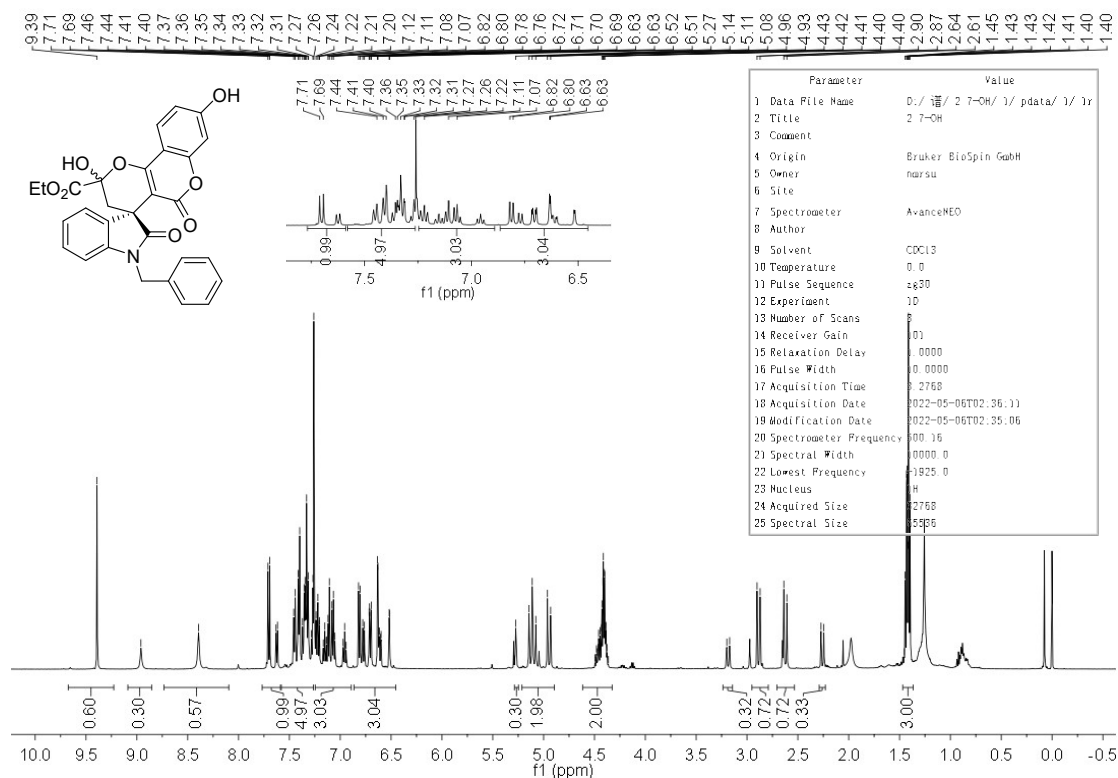

### <sup>13</sup>C NMR of 3aj

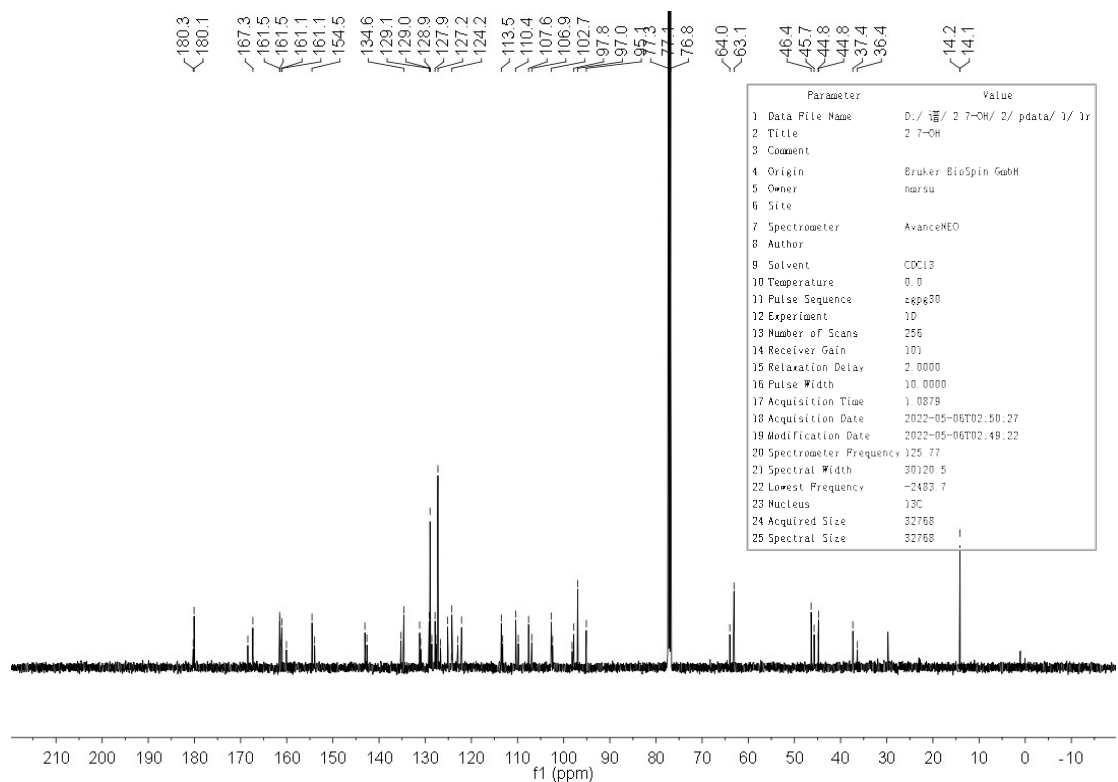

### <sup>1</sup>H NMR of L<sub>6</sub>

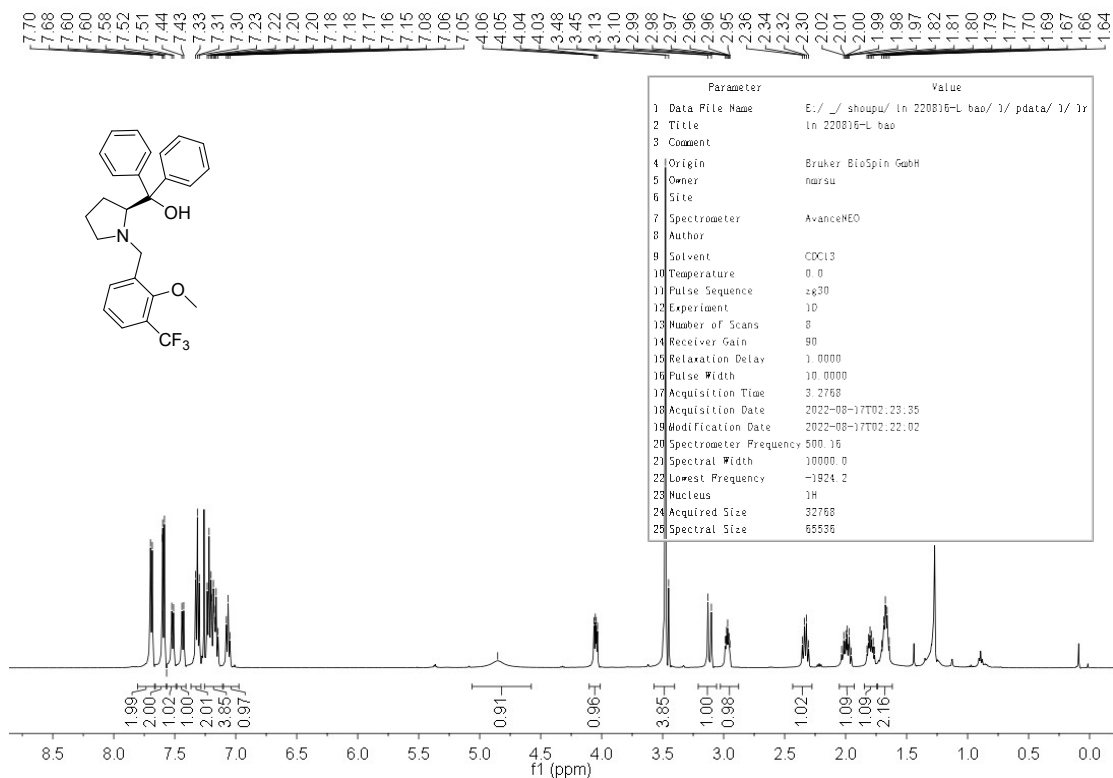

### <sup>13</sup>C NMR of L<sub>6</sub>

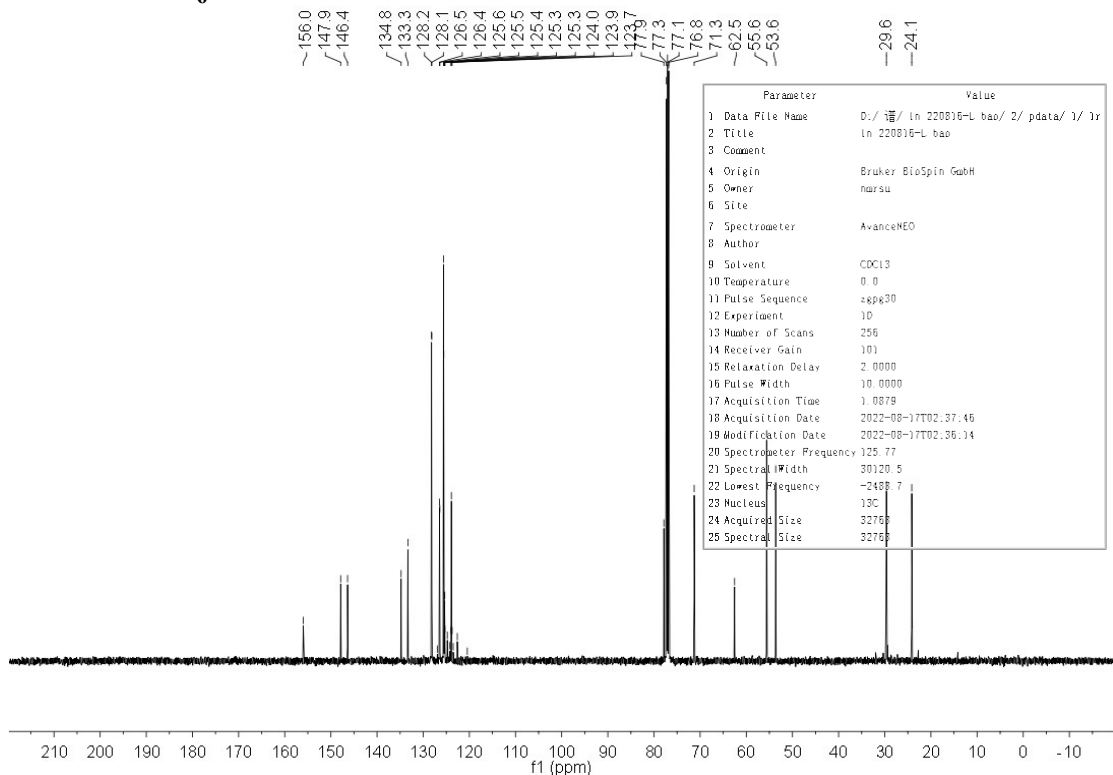

# <sup>19</sup>F NMR of L<sub>6</sub>

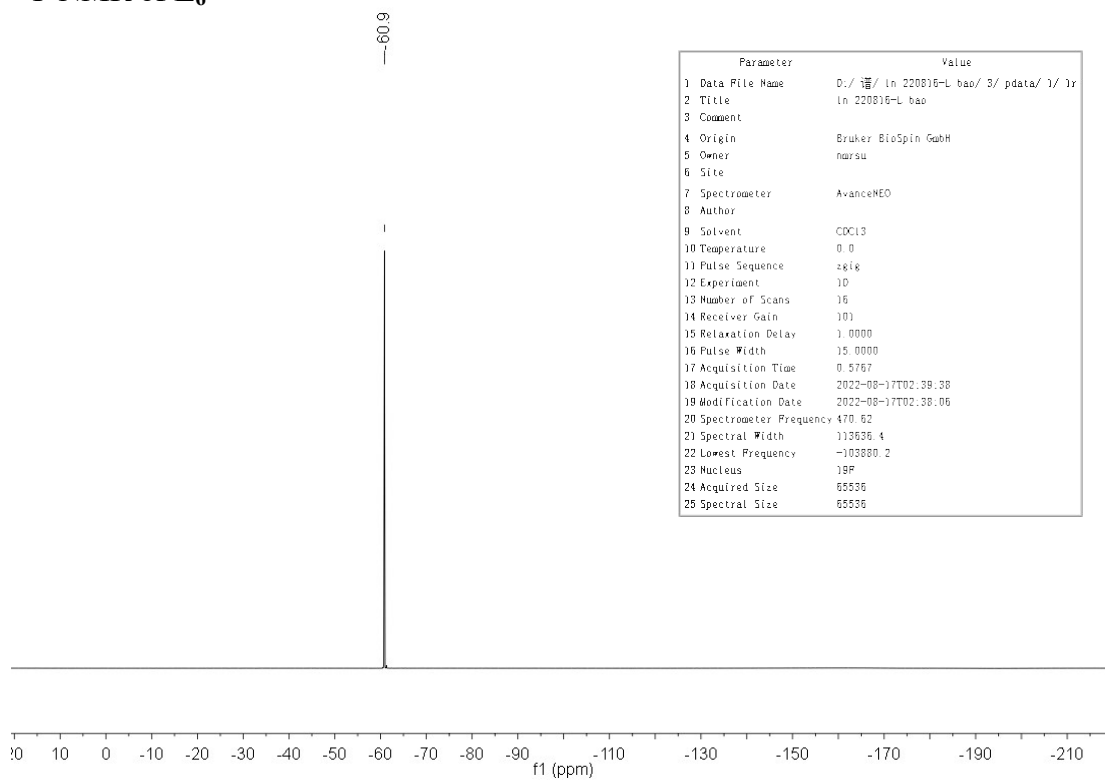

## Part III HPLC data

### 3aa

Racemic sample

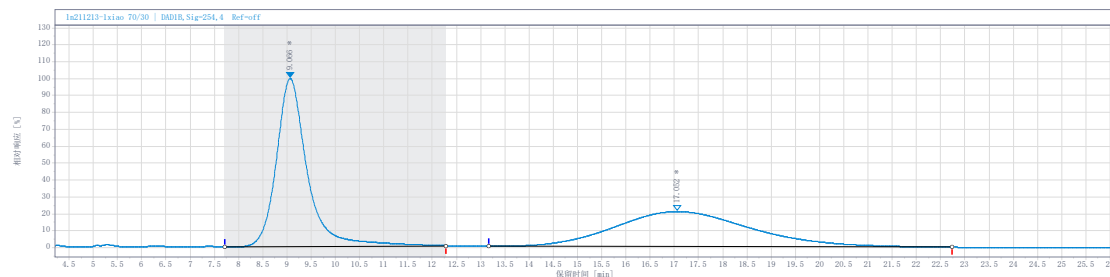

Signal: DAD1B, Sig=254, 4 Ref=off

| RetTime [min] | width [min] | Area [mAU*s] | Height [mAU] | Area% |
|---------------|-------------|--------------|--------------|-------|
| 9.07          | 4.55        | 27659.34     | 622.22       | 51.95 |
| 17.1          | 9.58        | 25580.86     | 130.11       | 48.05 |

Asymmetric version

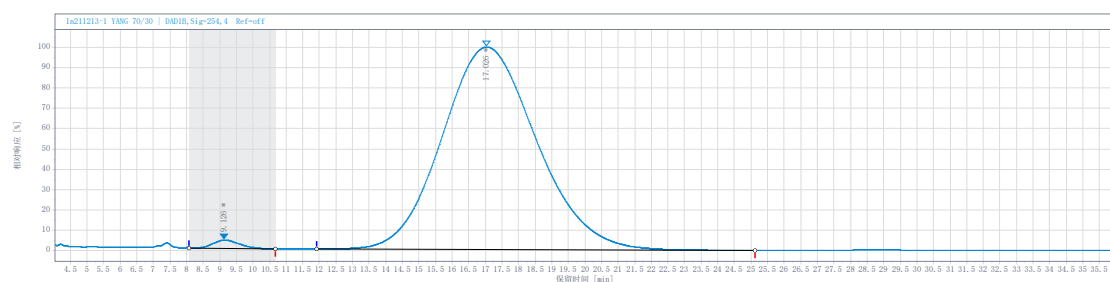

Signal: DAD1B, Sig=254, 4 Ref=off

| RetTime [min] | width [min] | Area [mAU*s] | Height [mAU] | Area% |
|---------------|-------------|--------------|--------------|-------|
| 9.13          | 2.59        | 162.90       | 3.02         | 1.08  |
| 17.0          | 13.22       | 14944.02     | 75.48        | 98.92 |

### 3ba

Racemic sample

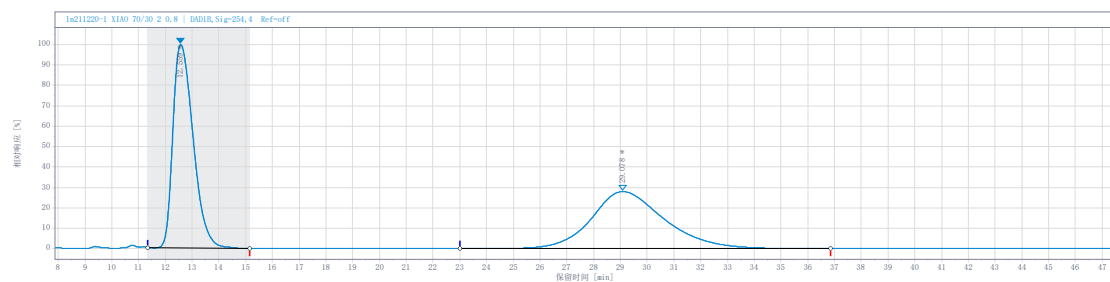



Signal: DAD1B, Sig=254, 4 Ref=off

| RetTime [min] | width [min] | Arer [mAU*s] | Height [mAU] | Area% |
|---------------|-------------|--------------|--------------|-------|
| 12.6          | 3.80        | 44962.66     | 858.52       | 49.48 |
| 29.1          | 13.86       | 45903.57     | 240.80       | 50.52 |

Asymmetric version

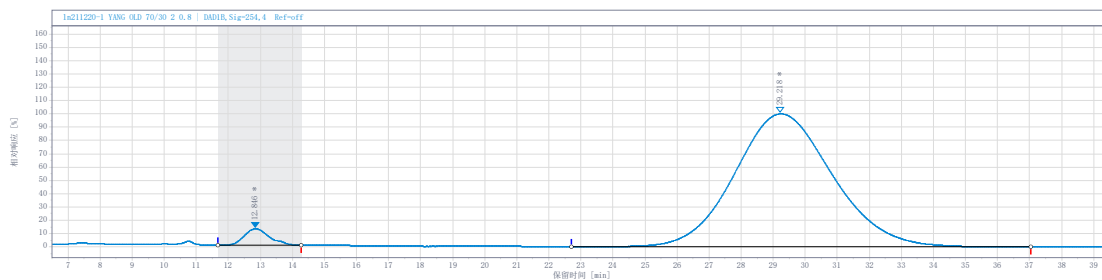

Signal: DAD1B, Sig=254, 4 Ref=off

| RetTime [min] | width [min] | Arer [mAU*s] | Height [mAU] | Area% |
|---------------|-------------|--------------|--------------|-------|
| 12.8          | 2.59        | 340.59       | 6.19         | 3.12  |
| 29.2          | 14.34       | 10575.27     | 49.71        | 96.88 |

3ca

Racemic sample

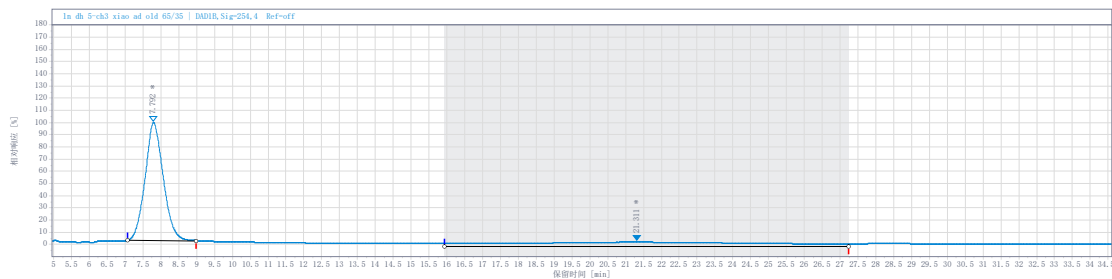

Signal: DAD1B, Sig=254, 4 Ref=off

| RetTime [min] | width [min] | Arer [mAU*s] | Height [mAU] | Area% |
|---------------|-------------|--------------|--------------|-------|
| 7.79          | 1.90        | 2903.38      | 82.19        | 65.13 |
| 21.3          | 11.32       | 1554.32      | 2.96         | 34.87 |

Asymmetric version

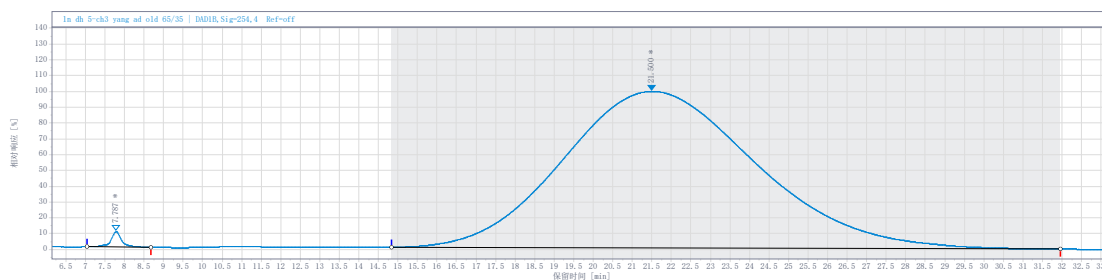

Signal: DAD1B, Sig=254, 4 Ref=off

| RetTime [min] | width [min] | Arer [mAU*s] | Height [mAU] | Area% |
|---------------|-------------|--------------|--------------|-------|
| 7.79          | 1.63        | 193.65       | 9.98         | 0.54  |
| 21.5          | 17.12       | 35407.57     | 102.68       | 99.46 |

### 3da

Racemic sample

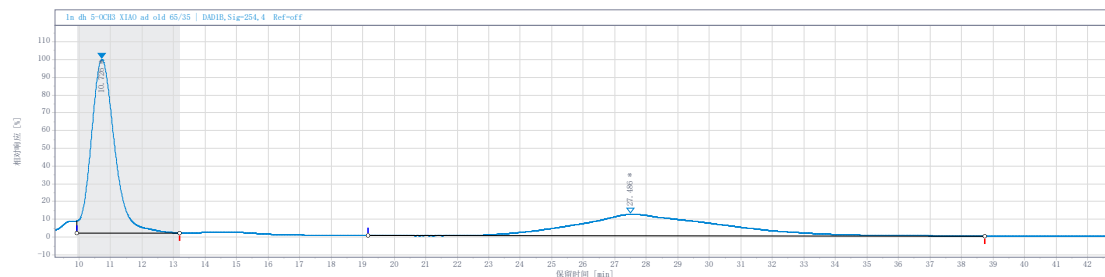

Signal: DAD1B, Sig=254, 4 Ref=off

| RetTime [min] | width [min] | Arer [mAU*s] | Height [mAU] | Area% |
|---------------|-------------|--------------|--------------|-------|
| 10.7          | 3.27        | 1794.75      | 34.98        | 57.21 |
| 27.5          | 19.57       | 1342.62      | 4.32         | 42.79 |

Asymmetric version

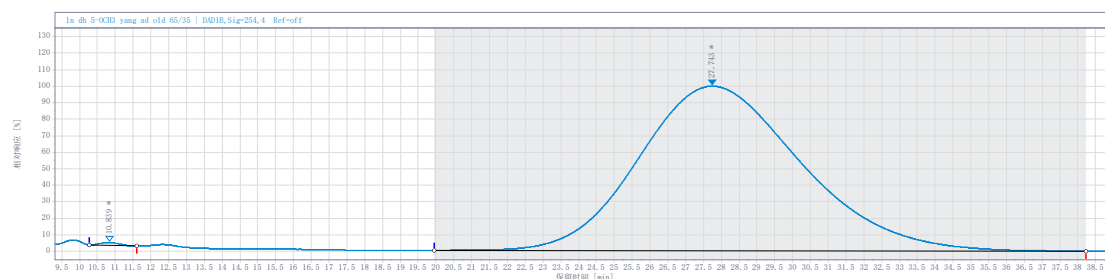

Signal: DAD1B, Sig=254, 4 Ref=off

| RetTime [min] | width [min] | Arer [mAU*s] | Height [mAU] | Area% |
|---------------|-------------|--------------|--------------|-------|
| 10.8          | 1.34        | 42.57        | 1.15         | 0.20  |
| 27.7          | 18.28       | 21030.56     | 66.22        | 99.80 |

### 3ea

Racemic sample

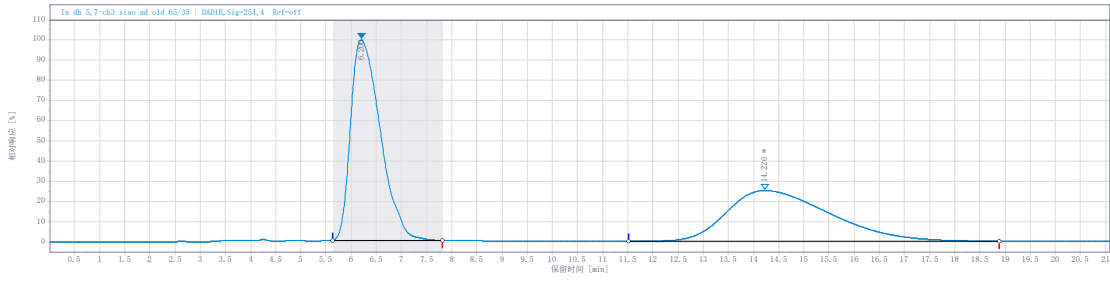

Signal: DAD1B, Sig=254, 4 Ref=off

| RetTime [min] | width [min] | Area [mAU*s] | Height [mAU] | Area% |
|---------------|-------------|--------------|--------------|-------|
| 6.20          | 2.19        | 36333.83     | 886.59       | 53.18 |
| 14.2          | 7.37        | 31991.48     | 224.50       | 46.82 |

Asymmetric version

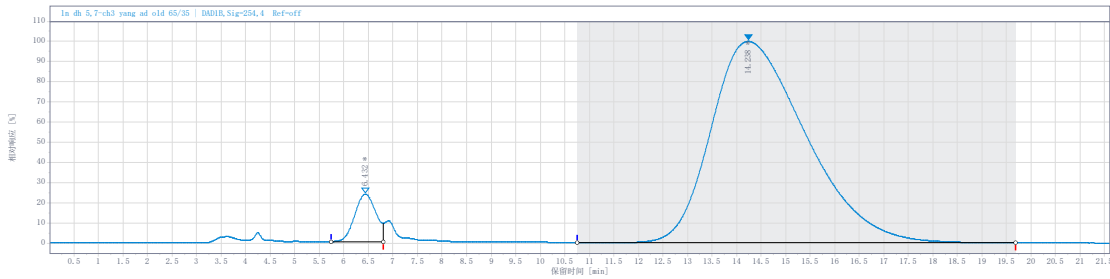

Signal: DAD1B, Sig=254, 4 Ref=off

| RetTime [min] | width [min] | Area [mAU*s] | Height [mAU] | Area% |
|---------------|-------------|--------------|--------------|-------|
| 6.43          | 1.06        | 1244.93      | 41.76        | 4.99  |
| 14.2          | 8.93        | 23689.57     | 177.02       | 95.01 |

3fa

Racemic sample

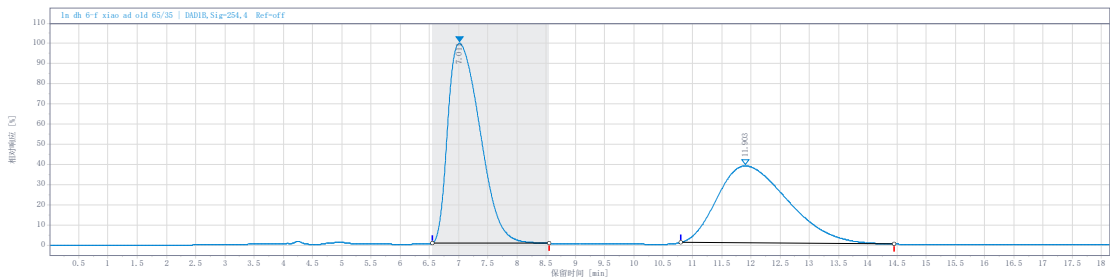

Signal: DAD1B, Sig=254, 4 Ref=off

| RetTime [min] | width [min] | Area [mAU*s] | Height [mAU] | Area% |
|---------------|-------------|--------------|--------------|-------|
| 7.01          | 2.01        | 25009.58     | 654.80       | 54.07 |
| 11.9          | 3.66        | 21244.62     | 252.43       | 45.93 |

Asymmetric version

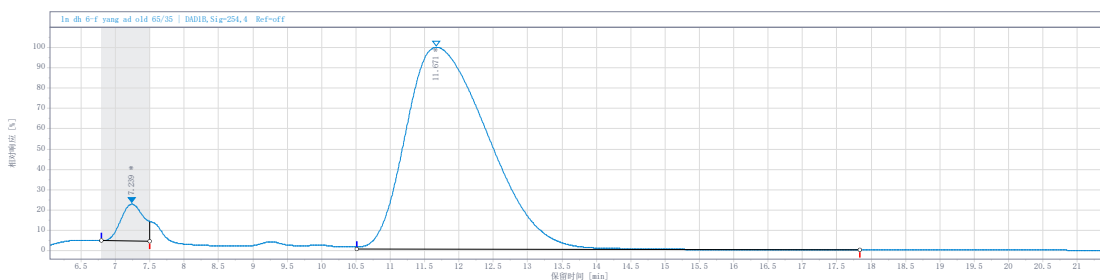

Signal: DAD1B, Sig=254, 4 Ref=off

| RetTime [min] | width [min] | Area [mAU*s] | Height [mAU] | Area% |
|---------------|-------------|--------------|--------------|-------|
| 7.24          | 0.70        | 1458.50      | 63.43        | 4.85  |
| 11.7          | 7.33        | 28642.86     | 344.90       | 95.15 |

### 3ga

Racemic sample

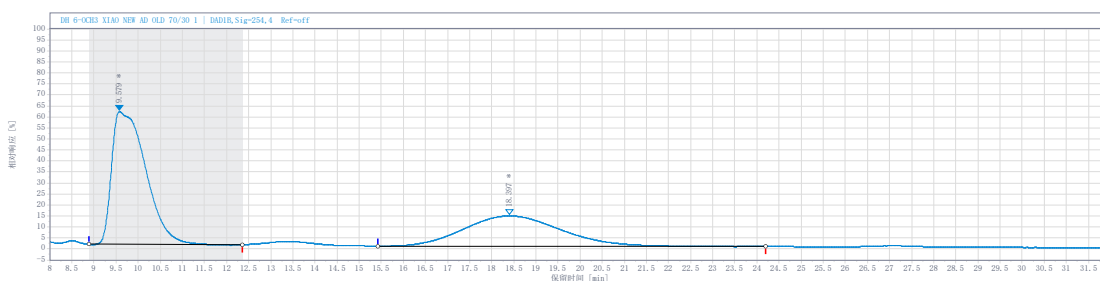

Signal: DAD1B, Sig=254, 4 Ref=off

| RetTime [min] | width [min] | Area [mAU*s] | Height [mAU] | Area% |
|---------------|-------------|--------------|--------------|-------|
| 9.58          | 3.48        | 2593.98      | 48.68        | 60.61 |
| 18.4          | 8.78        | 1686.04      | 11.09        | 39.39 |

Asymmetric version

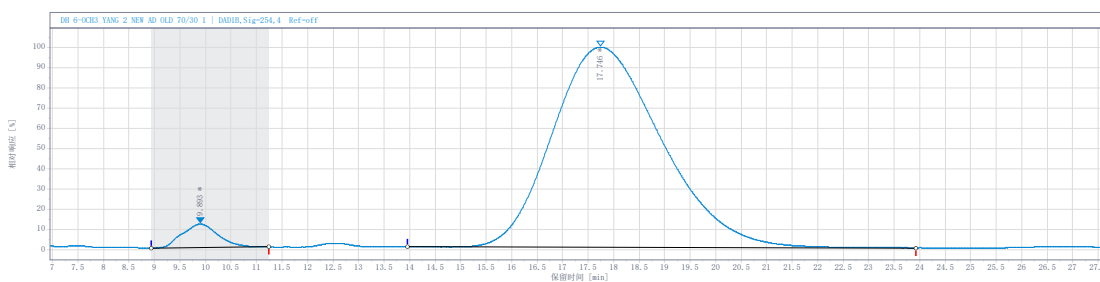

Signal: DAD1B, Sig=254, 4 Ref=off

| RetTime [min] | width [min] | Area [mAU*s] | Height [mAU] | Area% |
|---------------|-------------|--------------|--------------|-------|
| 9.89          | 2.31        | 195.59       | 3.99         | 3.72  |
| 17.7          | 9.97        | 5056.86      | 34.09        | 96.28 |

### 3ha

Racemic sample

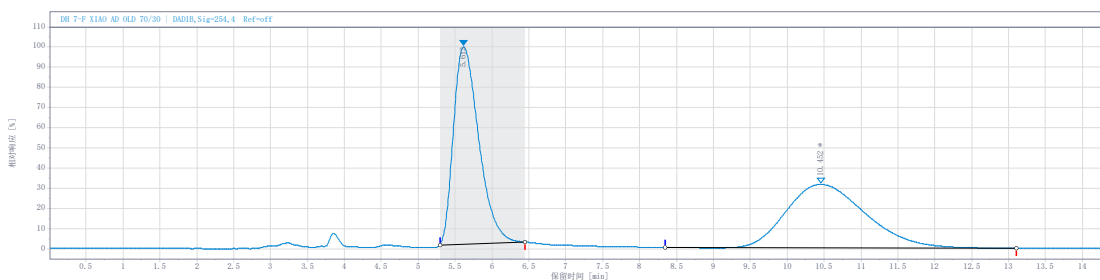

Signal: DAD1B, Sig=254, 4 Ref=off

| RetTime [min] | width [min] | Arer [mAU*s] | Height [mAU] | Area% |
|---------------|-------------|--------------|--------------|-------|
| 5.61          | 1.15        | 2734.21      | 114.54       | 49.91 |
| 10.5          | 4.76        | 2743.69      | 36.89        | 50.09 |

Asymmetric version

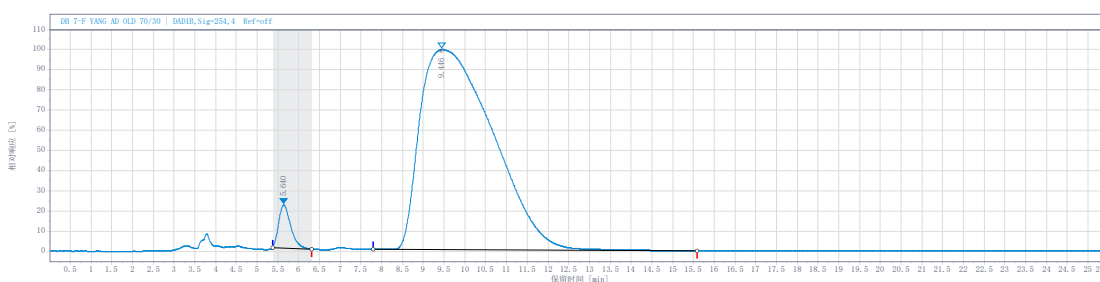

Signal: DAD1B, Sig=254, 4 Ref=off

| RetTime [min] | width [min] | Arer [mAU*s] | Height [mAU] | Area% |
|---------------|-------------|--------------|--------------|-------|
| 5.64          | 0.95        | 924.69       | 46.19        | 3.40  |
| 9.45          | 7.80        | 26246.91     | 215.43       | 96.60 |

3ia

Racemic sample

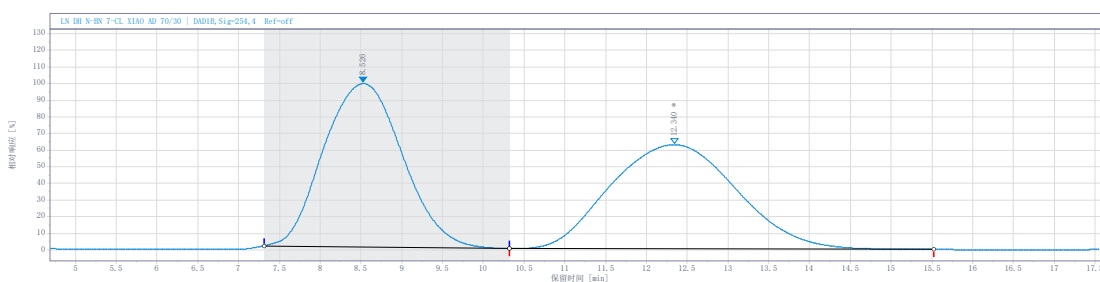

Signal: DAD1B, Sig=254, 4 Ref=off

| RetTime [min] | width [min] | Arer [mAU*s] | Height [mAU] | Area% |
|---------------|-------------|--------------|--------------|-------|
| 8.53          | 3.01        | 32925.57     | 488.06       | 49.49 |
| 12.3          | 5.20        | 33609.72     | 311.55       | 50.51 |

Asymmetric version

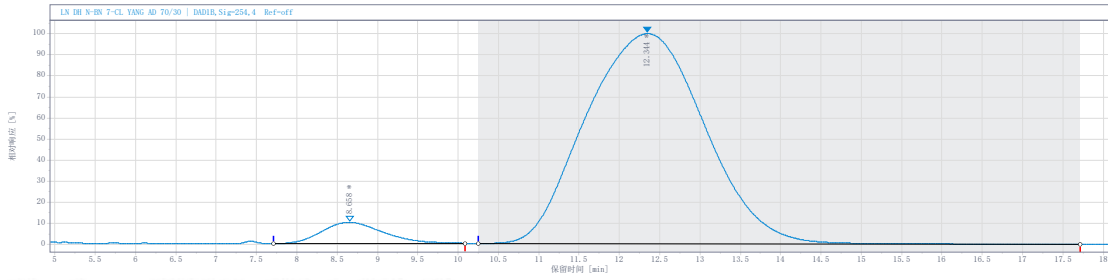

Signal: DAD1B, Sig=254, 4 Ref=off

| RetTime [min] | width [min] | Arer [mAU*s] | Height [mAU] | Area% |
|---------------|-------------|--------------|--------------|-------|
| 8.66          | 2.37        | 1091.47      | 20.65        | 4.96  |
| 12.3          | 7.47        | 20909.41     | 204.43       | 95.04 |

### 3ja

Racemic sample

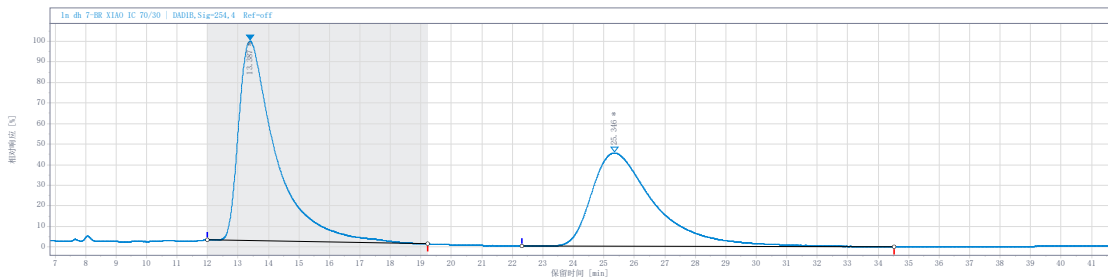

Signal: DAD1B, Sig=254, 4 Ref=off

| RetTime [min] | width [min] | Arer [mAU*s] | Height [mAU] | Area% |
|---------------|-------------|--------------|--------------|-------|
| 13.4          | 7.24        | 3103.47      | 36.49        | 56.34 |
| 25.3          | 12.22       | 2405.33      | 16.98        | 43.66 |

Asymmetric version

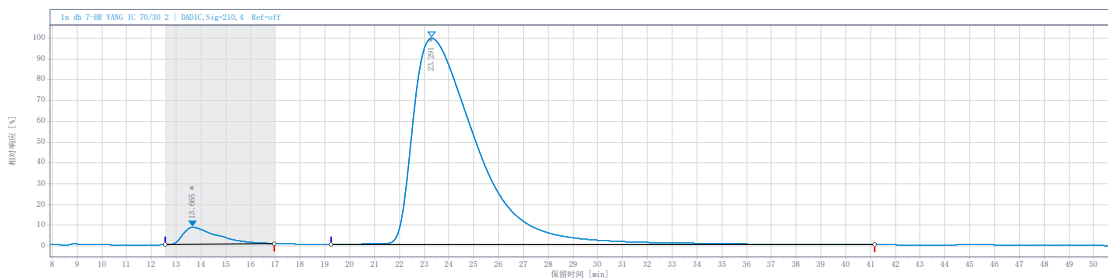

Signal: DAD1C, Sig=210, 4 Ref=off

| RetTime [min] | width [min] | Arer [mAU*s] | Height [mAU] | Area% |
|---------------|-------------|--------------|--------------|-------|
| 13.7          | 4.41        | 10309.70     | 106.79       | 4.28  |
| 23.3          | 21.94       | 230488.13    | 1291.93      | 95.72 |

### 3ka

Racemic sample

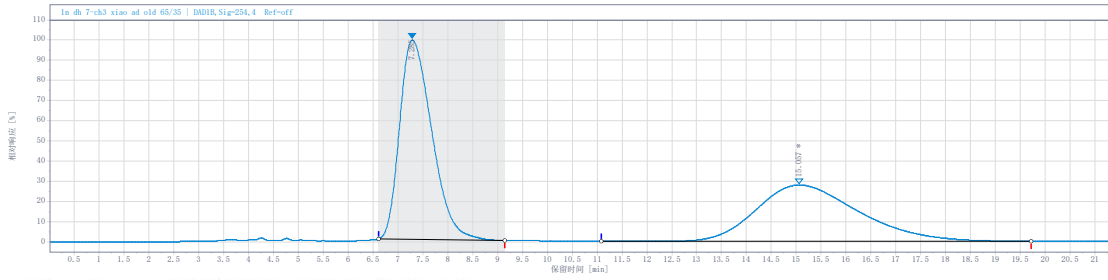

Signal: DAD1B, Sig=254, 4 Ref=off

| RetTime [min] | width [min] | Area [mAU*s] | Height [mAU] | Area% |
|---------------|-------------|--------------|--------------|-------|
| 7.29          | 2.53        | 30603.33     | 680.94       | 52.74 |
| 15.1          | 8.63        | 27420.64     | 192.15       | 47.26 |

Asymmetric version

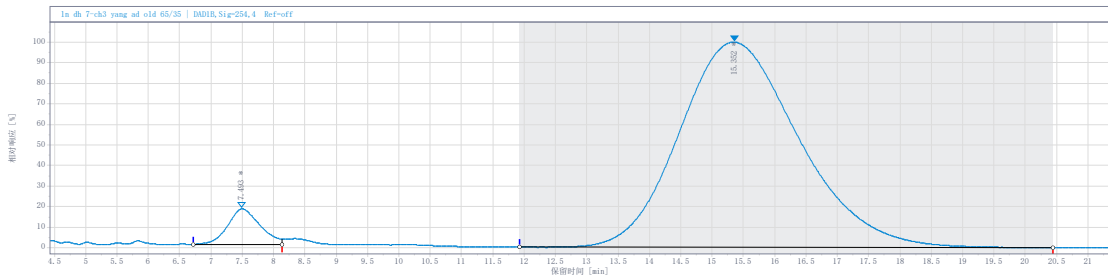

Signal: DAD1B, Sig=254, 4 Ref=off

| RetTime [min] | width [min] | Area [mAU*s] | Height [mAU] | Area% |
|---------------|-------------|--------------|--------------|-------|
| 7.49          | 1.42        | 394.63       | 11.03        | 4.45  |
| 15.4          | 8.51        | 8472.95      | 63.81        | 95.55 |

3la

Racemic sample

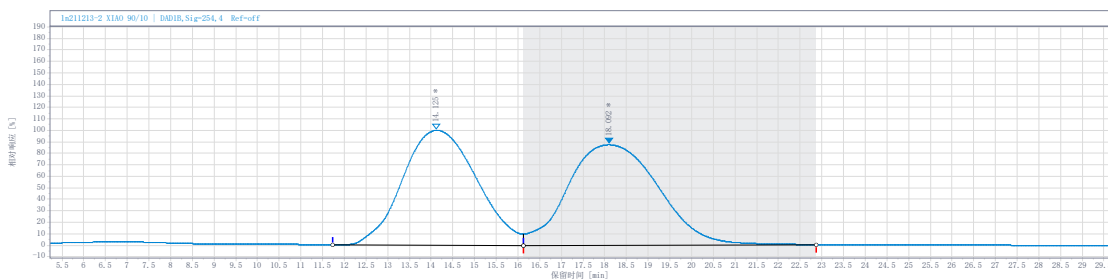

Signal: DAD1B, Sig=254, 4 Ref=off

| RetTime [min] | width [min] | Area [mAU*s] | Height [mAU] | Area% |
|---------------|-------------|--------------|--------------|-------|
| 14.1          | 4.38        | 32042.27     | 269.38       | 48.24 |
| 18.1          | 6.75        | 34377.23     | 235.89       | 51.76 |

Asymmetric version

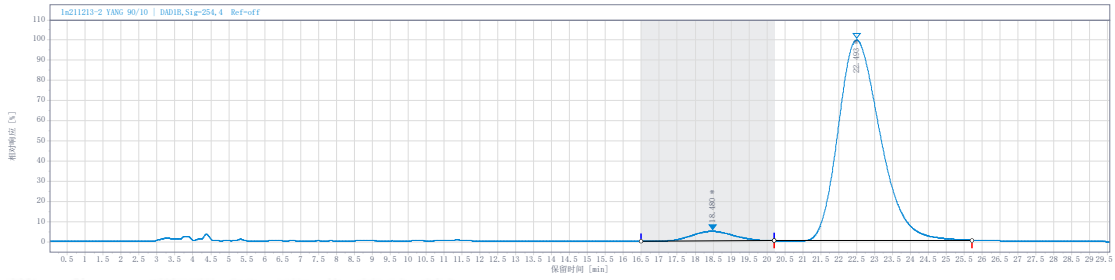

Signal: DAD1B, Sig=254, 4 Ref=off

| RetTime [min] | width [min] | Arer [mAU*s] | Height [mAU] | Area% |
|---------------|-------------|--------------|--------------|-------|
| 18.5          | 3.71        | 369.30       | 4.49         | 4.71  |
| 22.5          | 5.52        | 7474.12      | 92.47        | 95.29 |

3ma

Racemic sample

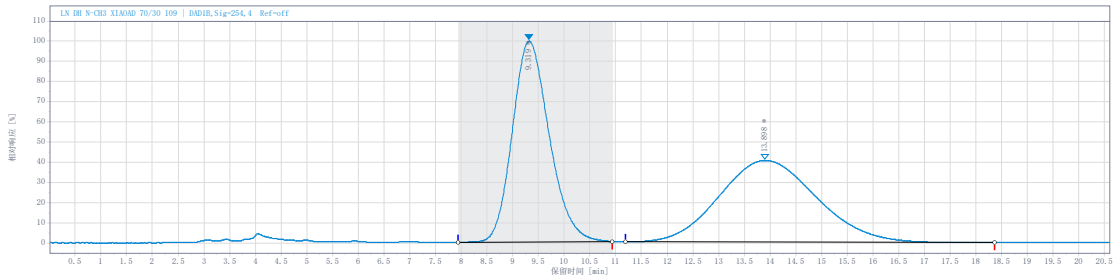

Signal: DAD1B, Sig=254, 4 Ref=off

| RetTime [min] | width [min] | Arer [mAU*s] | Height [mAU] | Area% |
|---------------|-------------|--------------|--------------|-------|
| 9.32          | 3.01        | 8761.38      | 175.48       | 48.30 |
| 13.9          | 7.17        | 9378.44      | 71.43        | 51.70 |

Asymmetric version

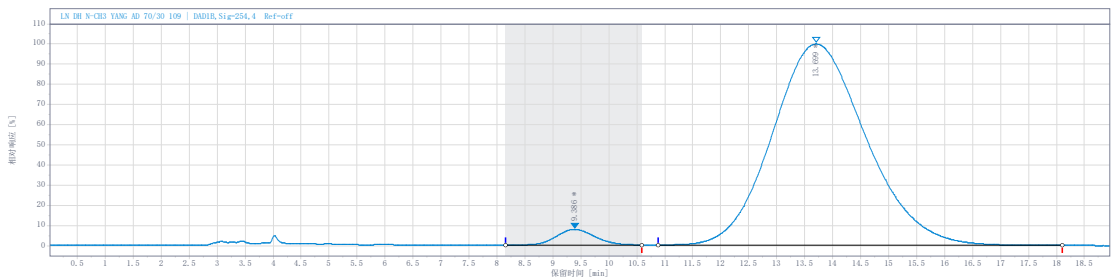

Signal: DAD1B, Sig=254, 4 Ref=off

| RetTime [min] | width [min] | Arer [mAU*s] | Height [mAU] | Area% |
|---------------|-------------|--------------|--------------|-------|
| 9.39          | 2.44        | 711.38       | 14.86        | 3.10  |
| 13.7          | 7.22        | 22267.27     | 191.16       | 96.90 |

3na

Racemic sample



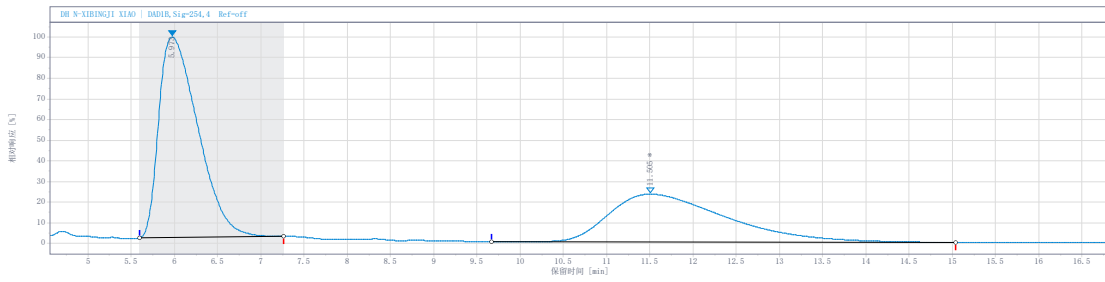

Signal: DAD1B, Sig=254, 4 Ref=off

| RetTime [min] | width [min] | Arer [mAU*s] | Height [mAU] | Area% |
|---------------|-------------|--------------|--------------|-------|
| 5.97          | 1.67        | 12804.93     | 408.02       | 58.44 |
| 11.5          | 5.36        | 9106.15      | 97.07        | 41.56 |

Asymmetric version

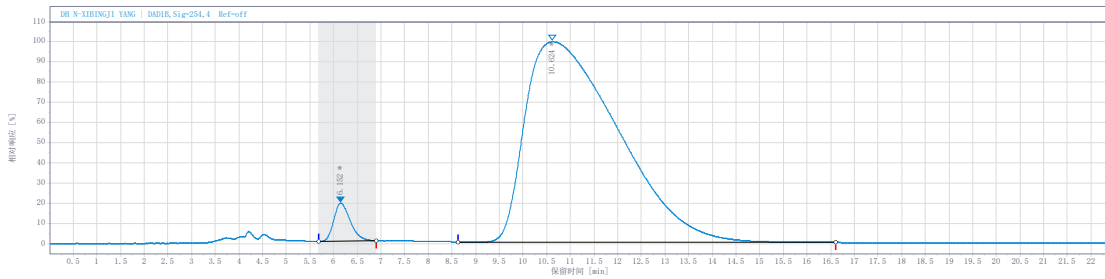

Signal: DAD1B, Sig=254, 4 Ref=off

| RetTime [min] | width [min] | Arer [mAU*s] | Height [mAU] | Area% |
|---------------|-------------|--------------|--------------|-------|
| 6.15          | 1.22        | 844.68       | 35.00        | 3.26  |
| 10.6          | 7.97        | 25088.41     | 184.02       | 96.74 |

30a

Racemic sample

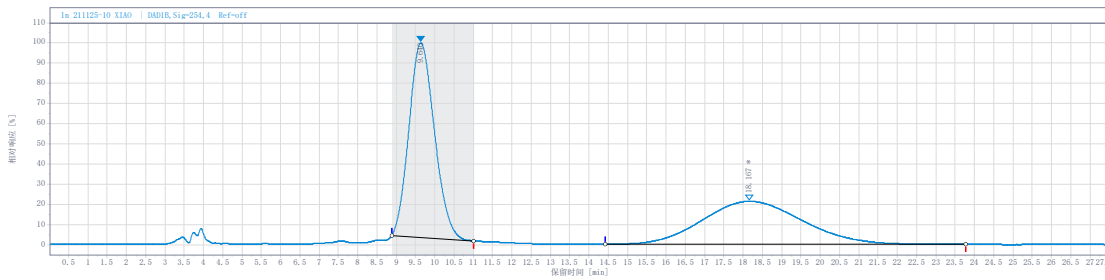

Signal: DAD1B, Sig=254, 4 Ref=off

| RetTime [min] | width [min] | Arer [mAU*s] | Height [mAU] | Area% |
|---------------|-------------|--------------|--------------|-------|
| 9.64          | 2.12        | 8091.78      | 175.92       | 53.43 |
| 18.2          | 9.35        | 7054.23      | 38.93        | 46.57 |

Asymmetric version

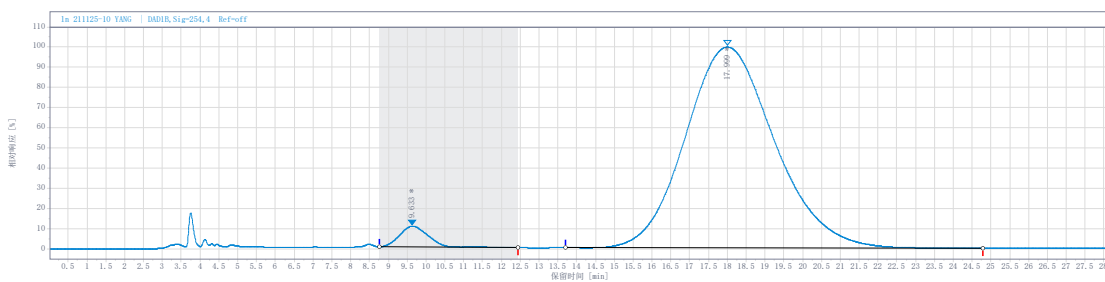

Signal: DAD1B, Sig=254, 4 Ref=off

| RetTime [min] | width [min] | Arer [mAU*s] | Height [mAU] | Area% |
|---------------|-------------|--------------|--------------|-------|
| 9.63          | 3.68        | 1107.13      | 20.81        | 3.26  |
| 18.0          | 11.08       | 32894.06     | 200.48       | 96.74 |

3pa

Racemic sample

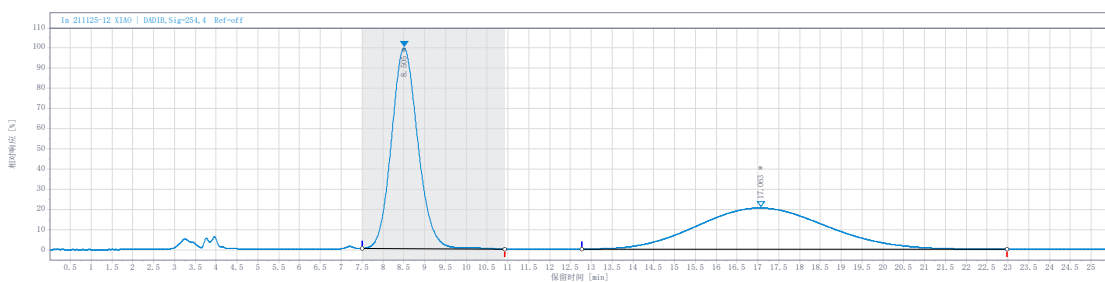

Signal: DAD1B, Sig=254, 4 Ref=off

| RetTime [min] | width [min] | Arer [mAU*s] | Height [mAU] | Area% |
|---------------|-------------|--------------|--------------|-------|
| 8.50          | 3.42        | 3479.54      | 79.21        | 49.60 |
| 17.1          | 10.20       | 3535.68      | 16.30        | 50.40 |

Asymmetric version

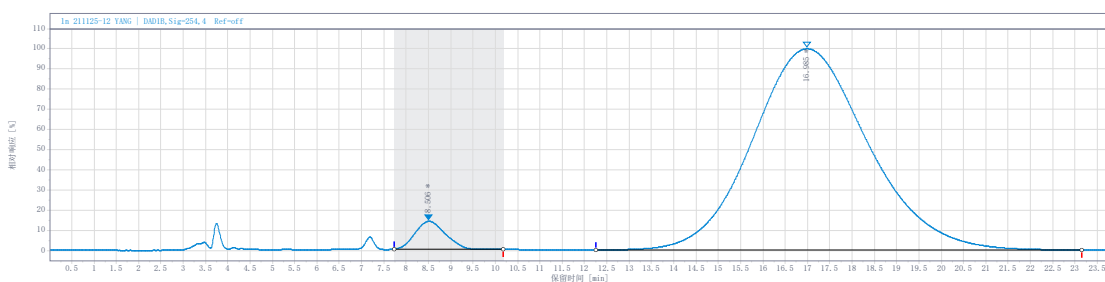

Signal: DAD1B, Sig=254, 4 Ref=off

| RetTime [min] | width [min] | Arer [mAU*s] | Height [mAU] | Area% |
|---------------|-------------|--------------|--------------|-------|
| 8.51          | 2.44        | 909.93       | 19.37        | 3.48  |
| 17.0          | 10.88       | 25201.32     | 139.95       | 96.52 |

3qa

Racemic sample

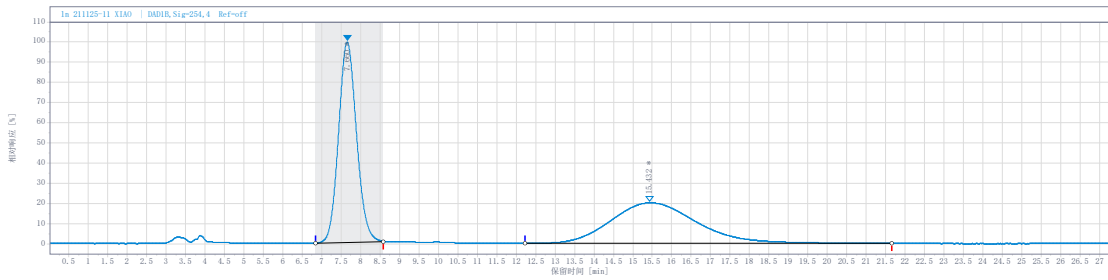

Signal: DAD1B, Sig=254, 4 Ref=off

| RetTime [min] | width [min] | Arer [mAU*s] | Height [mAU] | Area% |
|---------------|-------------|--------------|--------------|-------|
| 7.66          | 1.75        | 3176.57      | 99.14        | 50.58 |
| 15.4          | 9.43        | 3104.17      | 20.16        | 49.42 |

Asymmetric version

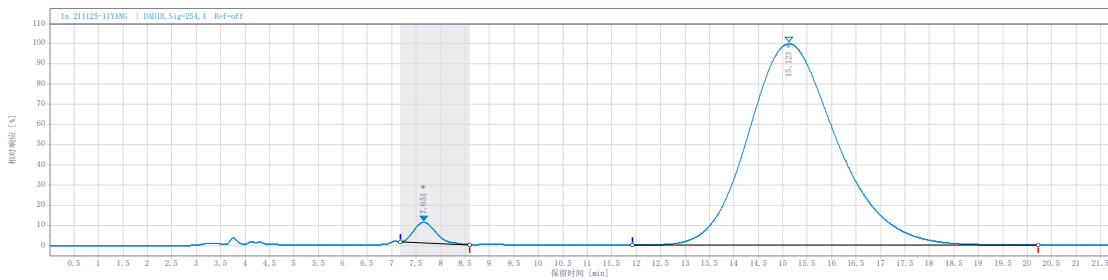

Signal: DAD1B, Sig=254, 4 Ref=off

| RetTime [min] | width [min] | Arer [mAU*s] | Height [mAU] | Area% |
|---------------|-------------|--------------|--------------|-------|
| 7.65          | 1.42        | 1024.59      | 32.91        | 2.47  |
| 15.1          | 8.28        | 40420.89     | 321.48       | 97.53 |

3ab

Racemic sample

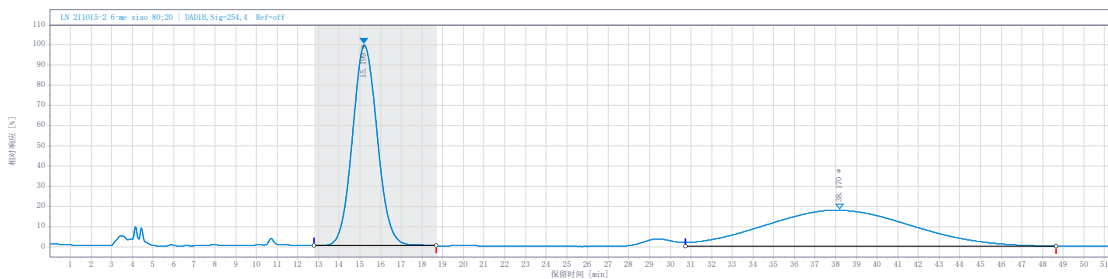

Signal: DAD1B, Sig=254, 4 Ref=off

| RetTime [min] | width [min] | Arer [mAU*s] | Height [mAU] | Area% |
|---------------|-------------|--------------|--------------|-------|
| 15.2          | 5.91        | 5283.10      | 63.64        | 48.31 |
| 38.2          | 17.92       | 5653.00      | 11.39        | 51.69 |

Asymmetric version

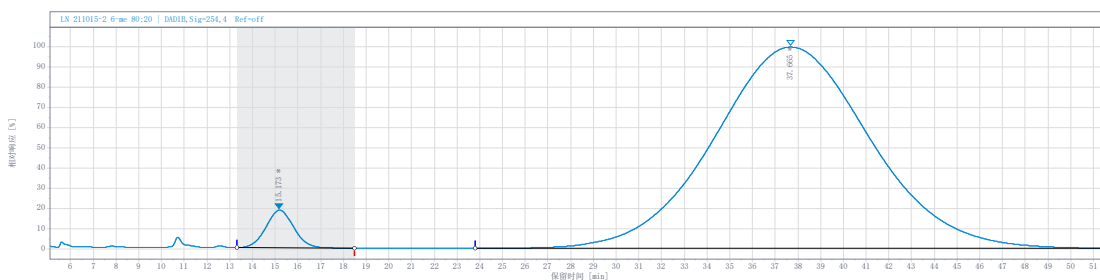

Signal: DAD1B, Sig=254, 4 Ref=off

| RetTime [min] | width [min] | Area [mAU*s] | Height [mAU] | Area% |
|---------------|-------------|--------------|--------------|-------|
| 15.2          | 5.15        | 3722.32      | 44.08        | 3.19  |
| 37.7          | 28.00       | 112980.35    | 235.50       | 96.81 |

### 3ac

Racemic sample

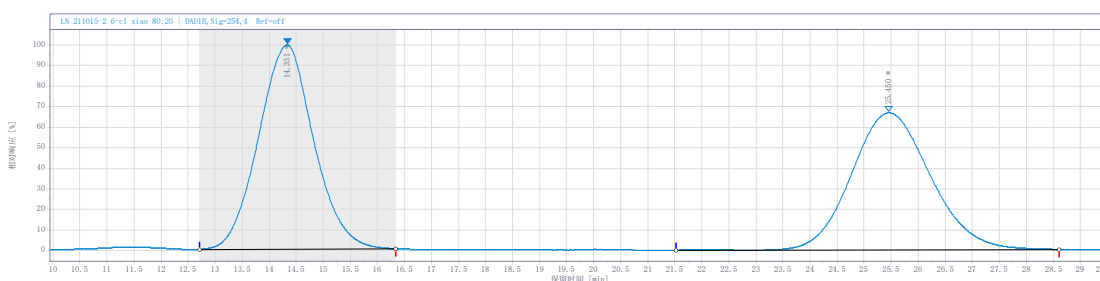

Signal: DAD1B, Sig=254, 4 Ref=off

| RetTime [min] | width [min] | Area [mAU*s] | Height [mAU] | Area% |
|---------------|-------------|--------------|--------------|-------|
| 14.3          | 3.63        | 2702.86      | 38.15        | 51.12 |
| 25.4          | 7.09        | 2584.14      | 25.56        | 48.88 |

Asymmetric version

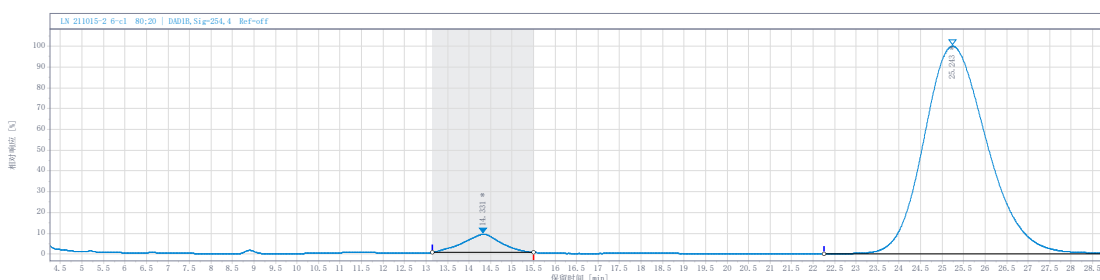

Signal: DAD1B, Sig=254, 4 Ref=off

| RetTime [min] | width [min] | Area [mAU*s] | Height [mAU] | Area% |
|---------------|-------------|--------------|--------------|-------|
| 14.3          | 2.36        | 525.48       | 8.57         | 5.02  |
| 25.2          | 6.62        | 9936.07      | 97.93        | 94.98 |

### 3ad

Racemic sample

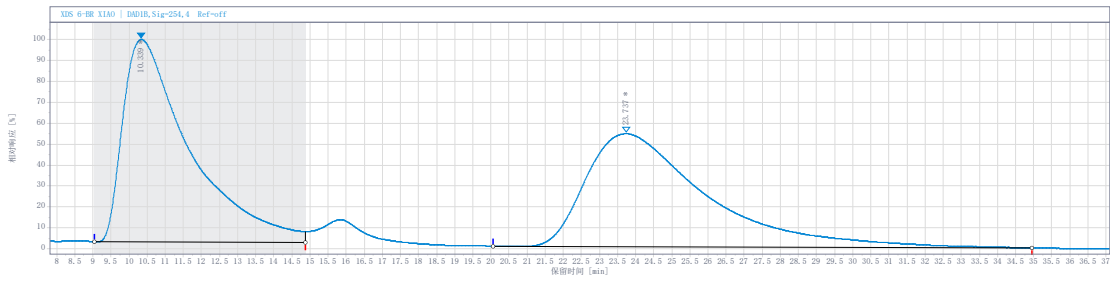

Signal: DAD1B, Sig=254, 4 Ref=off

| RetTime [min] | width [min] | Arer [mAU*s] | Height [mAU] | Area% |
|---------------|-------------|--------------|--------------|-------|
| 10.3          | 5.82        | 4222.53      | 32.89        | 50.03 |
| 23.7          | 14.89       | 4216.95      | 18.33        | 49.97 |

Asymmetric version

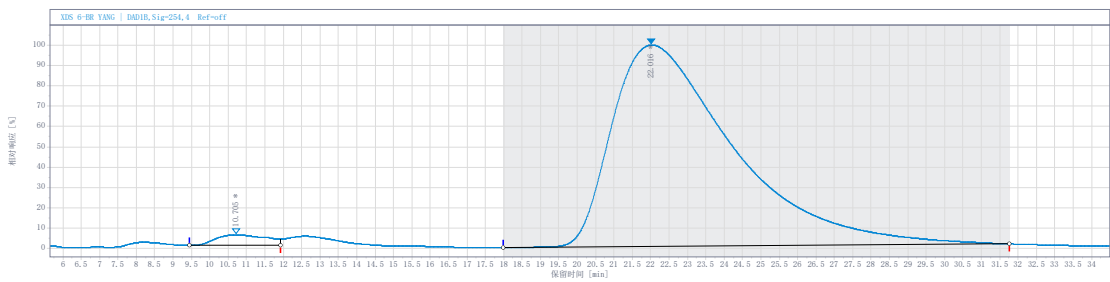

Signal: DAD1B, Sig=254, 4 Ref=off

| RetTime [min] | width [min] | Arer [mAU*s] | Height [mAU] | Area% |
|---------------|-------------|--------------|--------------|-------|
| 10.7          | 2.48        | 503.56       | 5.17         | 2.19  |
| 22.0          | 13.77       | 22508.47     | 97.87        | 97.81 |

3ae

Racemic sample

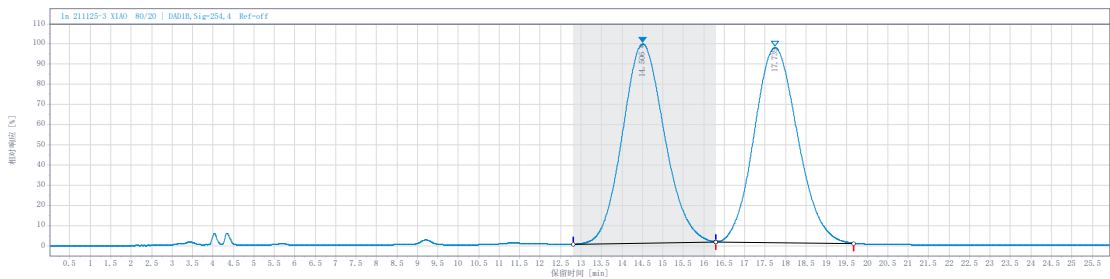

Signal: DAD1B, Sig=254, 4 Ref=off

| RetTime [min] | width [min] | Arer [mAU*s] | Height [mAU] | Area% |
|---------------|-------------|--------------|--------------|-------|
| 14.5          | 3.50        | 14879.70     | 208.26       | 49.76 |
| 17.7          | 3.36        | 15021.79     | 203.70       | 50.24 |

Asymmetric version

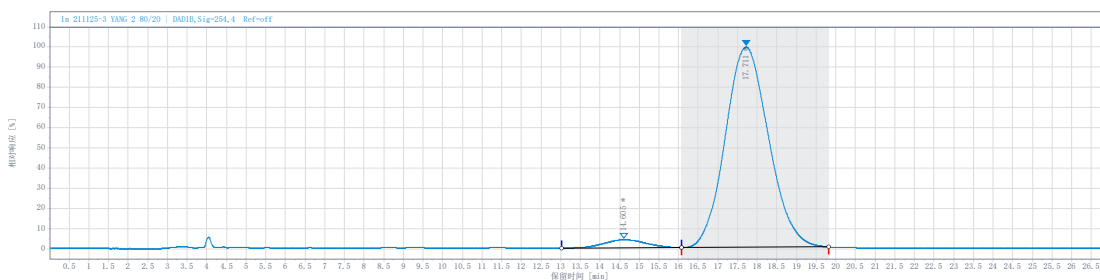

Signal: DAD1B, Sig=254, 4 Ref=off

| RetTime [min] | width [min] | Arer [mAU*s] | Height [mAU] | Area% |
|---------------|-------------|--------------|--------------|-------|
| 14.6          | 3.05        | 609.26       | 8.39         | 3.68  |
| 17.7          | 3.75        | 15951.86     | 208.59       | 96.32 |

3af

Racemic sample

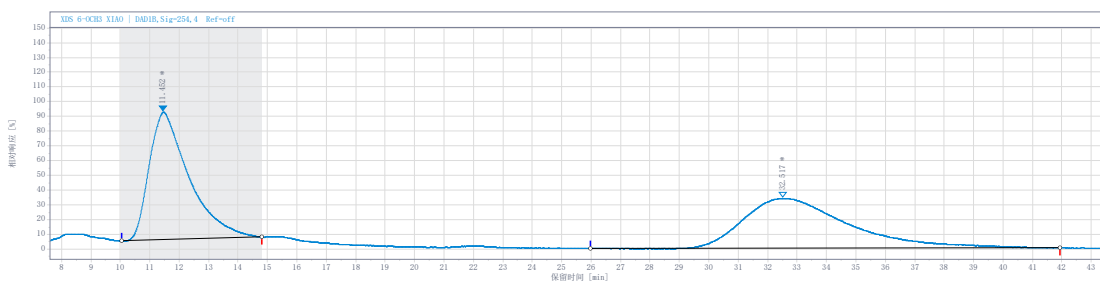

Signal: DAD1B, Sig=254, 4 Ref=off

| RetTime [min] | width [min] | Arer [mAU*s] | Height [mAU] | Area% |
|---------------|-------------|--------------|--------------|-------|
| 11.5          | 4.76        | 801.74       | 8.59         | 49.36 |
| 32.5          | 15.95       | 822.54       | 3.36         | 50.64 |

Asymmetric version

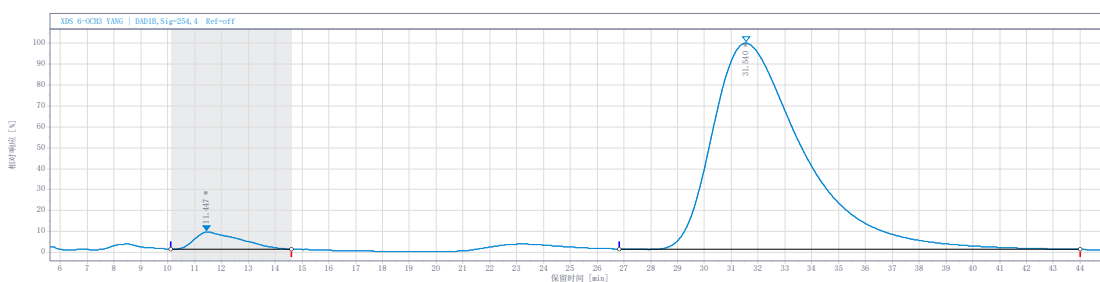

Signal: DAD1B, Sig=254, 4 Ref=off

| RetTime [min] | width [min] | Arer [mAU*s] | Height [mAU] | Area% |
|---------------|-------------|--------------|--------------|-------|
| 11.4          | 4.51        | 510.96       | 4.44         | 4.00  |
| 31.5          | 17.19       | 12273.75     | 52.56        | 96.00 |

3ag

Racemic sample

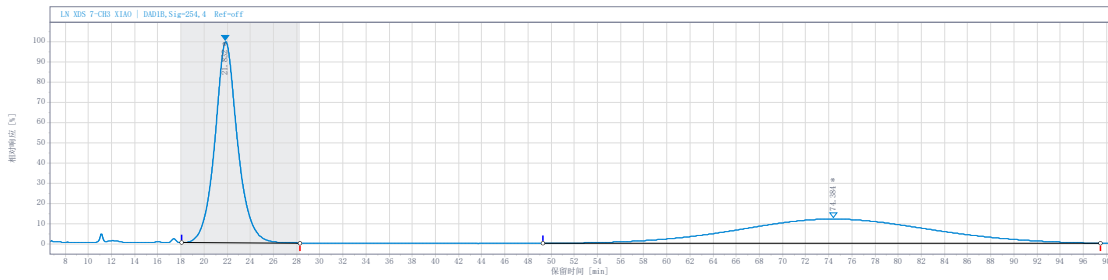

Signal: DAD1B, Sig=254, 4 Ref=off

| RetTime [min] | width [min] | Arer [mAU*s] | Height [mAU] | Area% |
|---------------|-------------|--------------|--------------|-------|
| 21.8          | 10.25       | 35661.79     | 262.45       | 49.21 |
| 74.4          | 48.15       | 36799.94     | 31.50        | 50.79 |

Asymmetric version

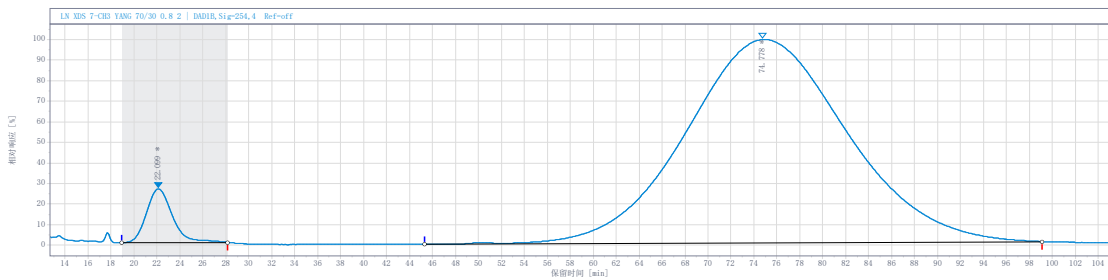

Signal: DAD1B, Sig=254, 4 Ref=off

| RetTime [min] | width [min] | Arer [mAU*s] | Height [mAU] | Area% |
|---------------|-------------|--------------|--------------|-------|
| 22.1          | 9.25        | 1245.69      | 7.98         | 4.04  |
| 74.8          | 53.85       | 29564.45     | 30.22        | 95.96 |

3ah

Racemic sample

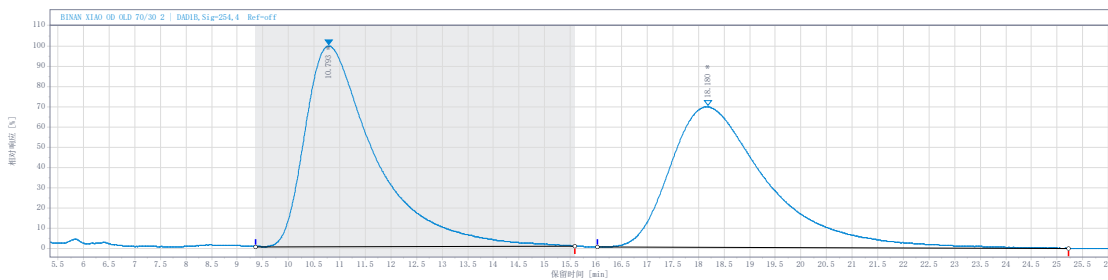

Signal: DAD1B, Sig=254, 4 Ref=off

| RetTime [min] | width [min] | Arer [mAU*s] | Height [mAU] | Area% |
|---------------|-------------|--------------|--------------|-------|
| 10.8          | 6.23        | 1483.83      | 15.72        | 50.67 |
| 18.2          | 9.19        | 1444.63      | 11.00        | 49.33 |

Asymmetric version

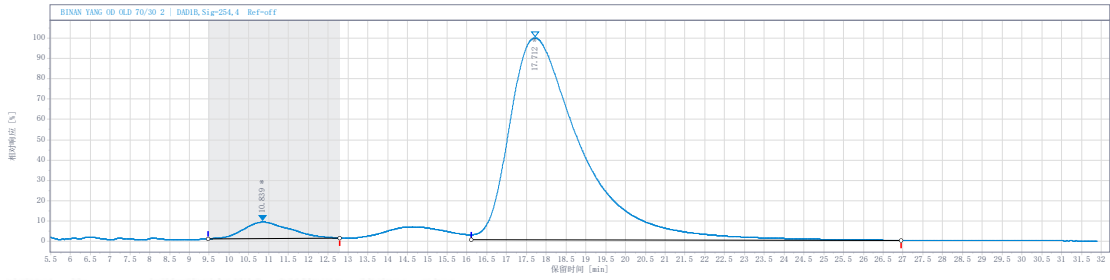

Signal: DAD1B, Sig=254, 4 Ref=off

| RetTime [min] | width [min] | Arer [mAU*s] | Height [mAU] | Area% |
|---------------|-------------|--------------|--------------|-------|
| 10.8          | 3.33        | 730.25       | 8.91         | 5.09  |
| 17.7          | 10.85       | 13609.36     | 108.74       | 94.91 |

3ai

Racemic sample

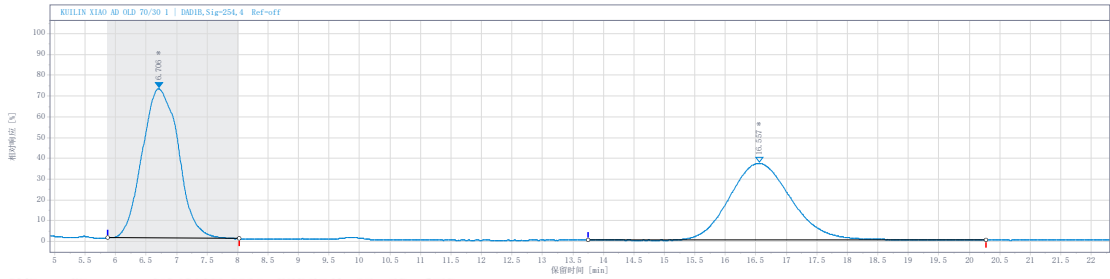

Signal: DAD1B, Sig=254, 4 Ref=off

| RetTime [min] | width [min] | Arer [mAU*s] | Height [mAU] | Area% |
|---------------|-------------|--------------|--------------|-------|
| 6.71          | 2.15        | 619.91       | 14.97        | 53.52 |
| 16.6          | 6.52        | 538.35       | 7.69         | 46.48 |

Asymmetric version

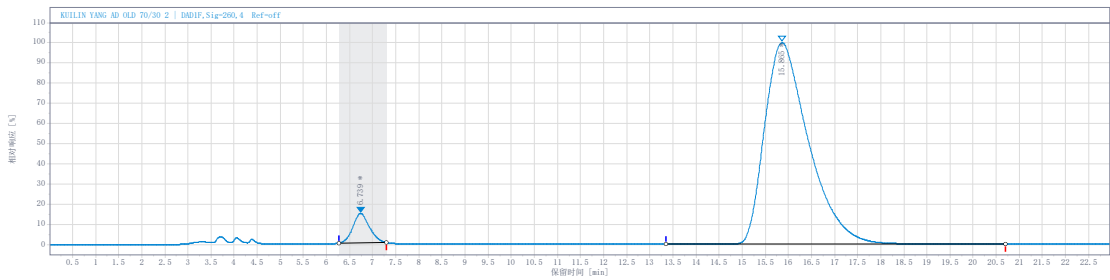

Signal: DAD1F, Sig=260, 4 Ref=off

| RetTime [min] | width [min] | Arer [mAU*s] | Height [mAU] | Area% |
|---------------|-------------|--------------|--------------|-------|
| 6.74          | 1.03        | 6360.70      | 258.84       | 5.16  |
| 15.9          | 7.37        | 116949.89    | 1767.38      | 94.84 |

3aj

Racemic sample



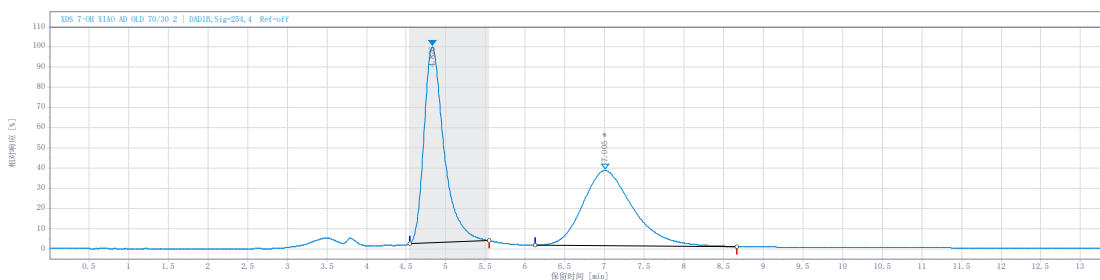

Signal: DAD1B, Sig=254, 4 Ref=off

| RetTime [min] | width [min] | Area [mAU*s] | Height [mAU] | Area% |
|---------------|-------------|--------------|--------------|-------|
| 4.83          | 1.00        | 4276.07      | 243.28       | 51.11 |
| 7.01          | 2.54        | 4089.68      | 93.44        | 48.89 |

Asymmetric version

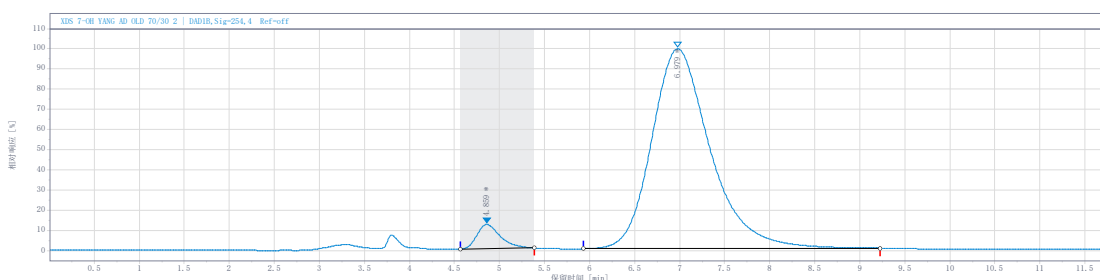

Signal: DAD1B, Sig=254, 4 Ref=off

| RetTime [min] | width [min] | Area [mAU*s] | Height [mAU] | Area% |
|---------------|-------------|--------------|--------------|-------|
| 4.86          | 0.82        | 267.80       | 14.87        | 4.59  |
| 6.98          | 3.29        | 5561.29      | 123.34       | 95.41 |

3aa (Gram scale)

Racemic sample

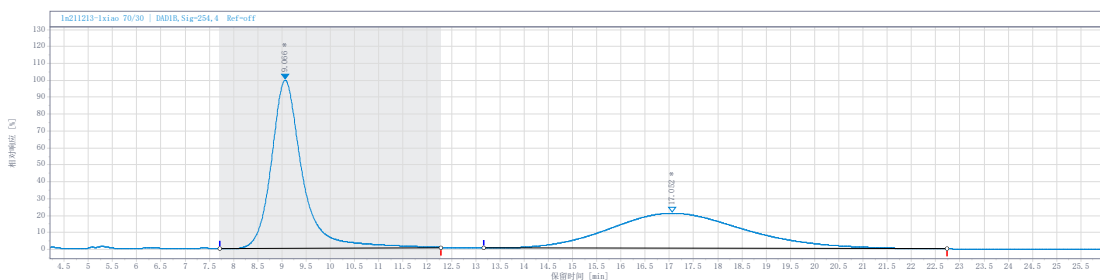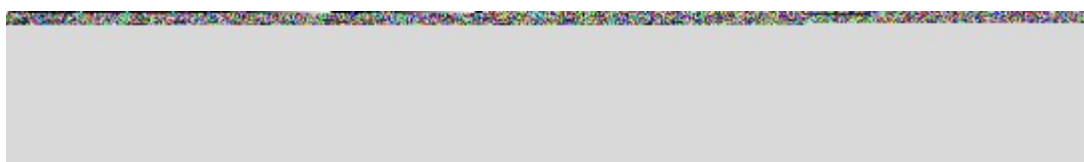

Asymmetric version

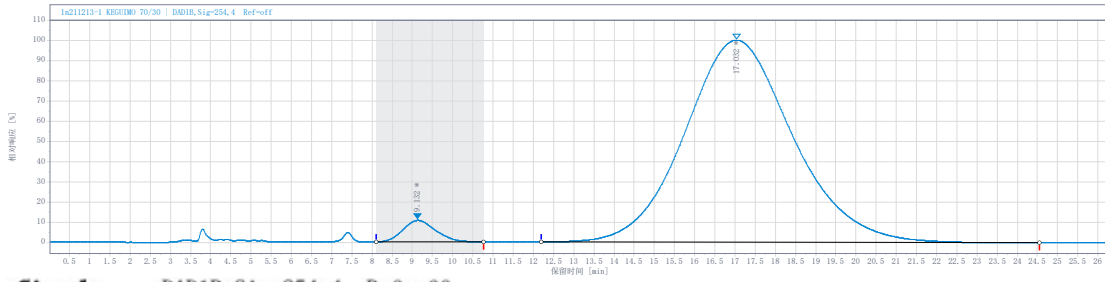

**Signal:** DAD1B, Sig=254, 4 Ref=off

| RetTime [min] | width [min] | Area [mAU*s] | Height [mAU] | Area% |
|---------------|-------------|--------------|--------------|-------|
| 9.13          | 2.66        | 1139.47      | 20.33        | 3.11  |
| 17.0          | 12.35       | 35518.08     | 190.52       | 96.89 |

## Part IV X-ray data of chiral **3aa**

### Crystal data and structure refinement for **3aa**:

|                                             |                                                               |
|---------------------------------------------|---------------------------------------------------------------|
| Empirical formula                           | C <sub>29</sub> H <sub>23</sub> NO <sub>7</sub>               |
| Formula weight                              | 497.48                                                        |
| Temperature/K                               | 293(2)                                                        |
| Crystal system                              | orthorhombic                                                  |
| Space group                                 | P212121                                                       |
| a/Å                                         | 11.7964(2)                                                    |
| b/Å                                         | 12.7829(2)                                                    |
| c/Å                                         | 16.2814(3)                                                    |
| α/°                                         | 90                                                            |
| β/°                                         | 90                                                            |
| γ/°                                         | 90                                                            |
| Volume/Å <sup>3</sup>                       | 2455.11(7)                                                    |
| Z                                           | 4                                                             |
| ρ <sub>calc</sub> /cm <sup>3</sup>          | 1.346                                                         |
| μ/mm <sup>-1</sup>                          | 0.802                                                         |
| F(000)                                      | 1040.0                                                        |
| Crystal size/mm <sup>3</sup>                | 0.2 × 0.18 × 0.15                                             |
| Radiation                                   | Cu Kα (λ = 1.54184)                                           |
| 2θ range for data collection/°              | 8.794 to 145.928                                              |
| Index ranges                                | -14 ≤ h ≤ 10, -15 ≤ k ≤ 15, -19 ≤ l ≤ 19                      |
| Reflections collected                       | 18417                                                         |
| Independent reflections                     | 4814 [R <sub>int</sub> = 0.0343, R <sub>sigma</sub> = 0.0272] |
| Data/restraints/parameters                  | 4814/0/336                                                    |
| Goodness-of-fit on F <sup>2</sup>           | 1.067                                                         |
| Final R indexes [I ≥ 2σ(I)]                 | R <sub>1</sub> = 0.0450, wR <sub>2</sub> = 0.1112             |
| Final R indexes [all data]                  | R <sub>1</sub> = 0.0555, wR <sub>2</sub> = 0.1194             |
| Largest diff. peak/hole / e Å <sup>-3</sup> | 0.20/-0.19                                                    |
| Flack parameter                             | 0.01(10)                                                      |

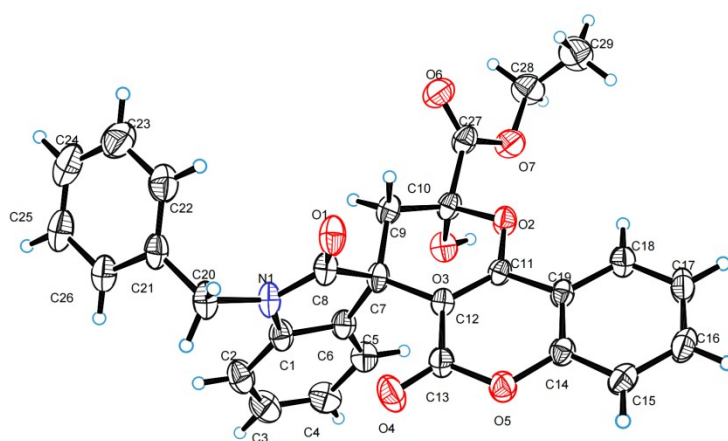

The crystal was prepared from the solution of **3aa** in toluene. Dissolved 10 mg **3aa** with 1 mL of toluene and volatilized slowly at 0 °C for 30 days. CCDC 2171098 contains the supplementary crystallographic data for this paper. These data can be obtained free of charge from The Cambridge Crystallographic Data Centre via [www.ccdc.cam.ac.uk/data\\_request/cif](http://www.ccdc.cam.ac.uk/data_request/cif).
